# Supplementary material
Source: PubMed Central journal article supplement (PMC9132548)
Supplement: NIHMS1800369-supplement-1800369_Sup_Info.pdf [file NIHMS1800369-supplement-1800369_Sup_Info.pdf]

# Supplementary Information

## - Supplementary Figures

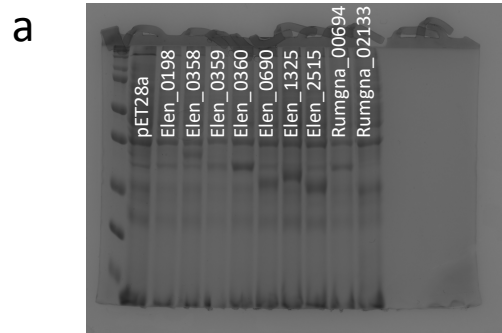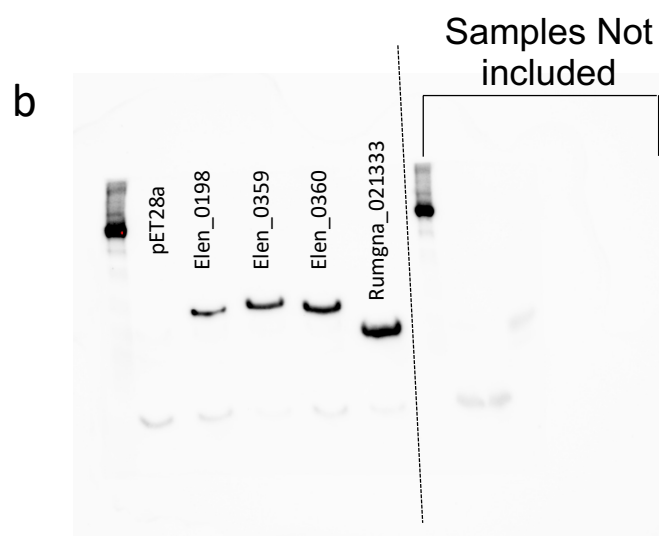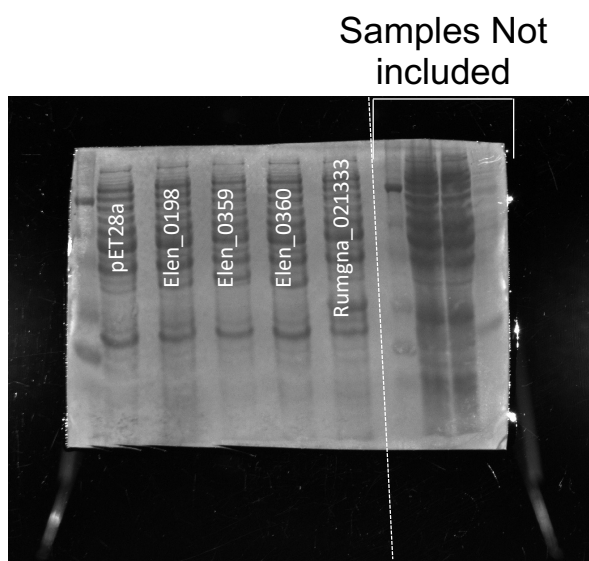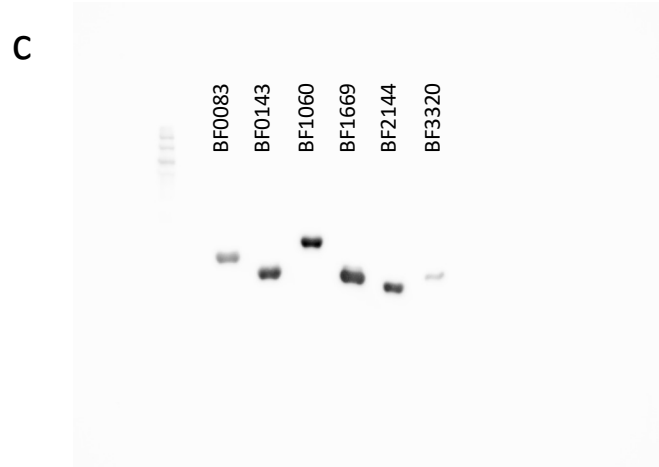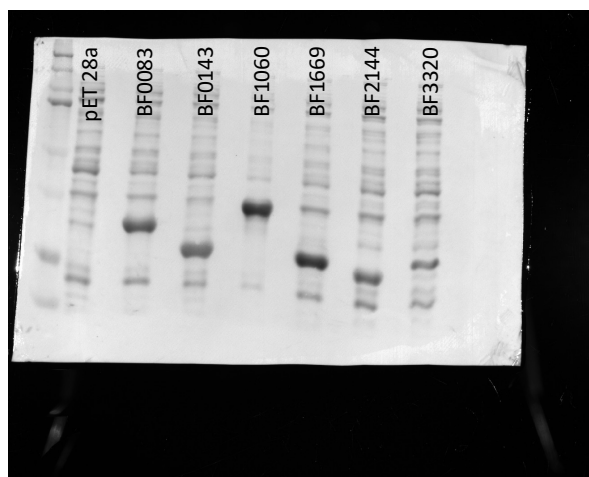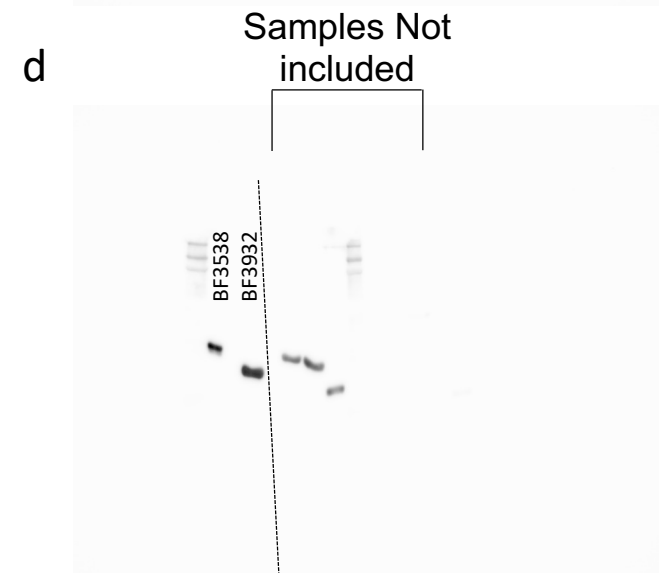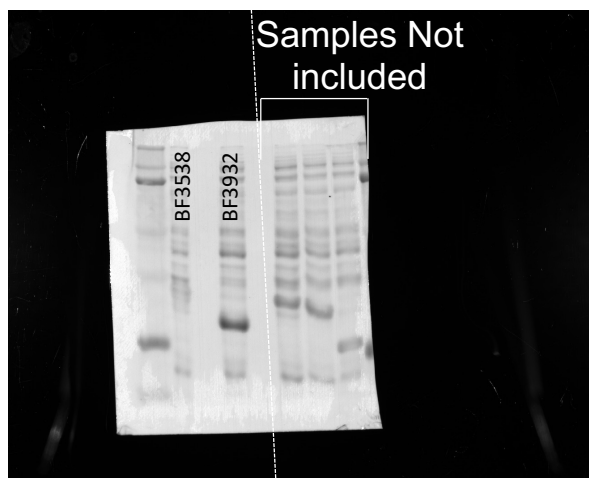

e

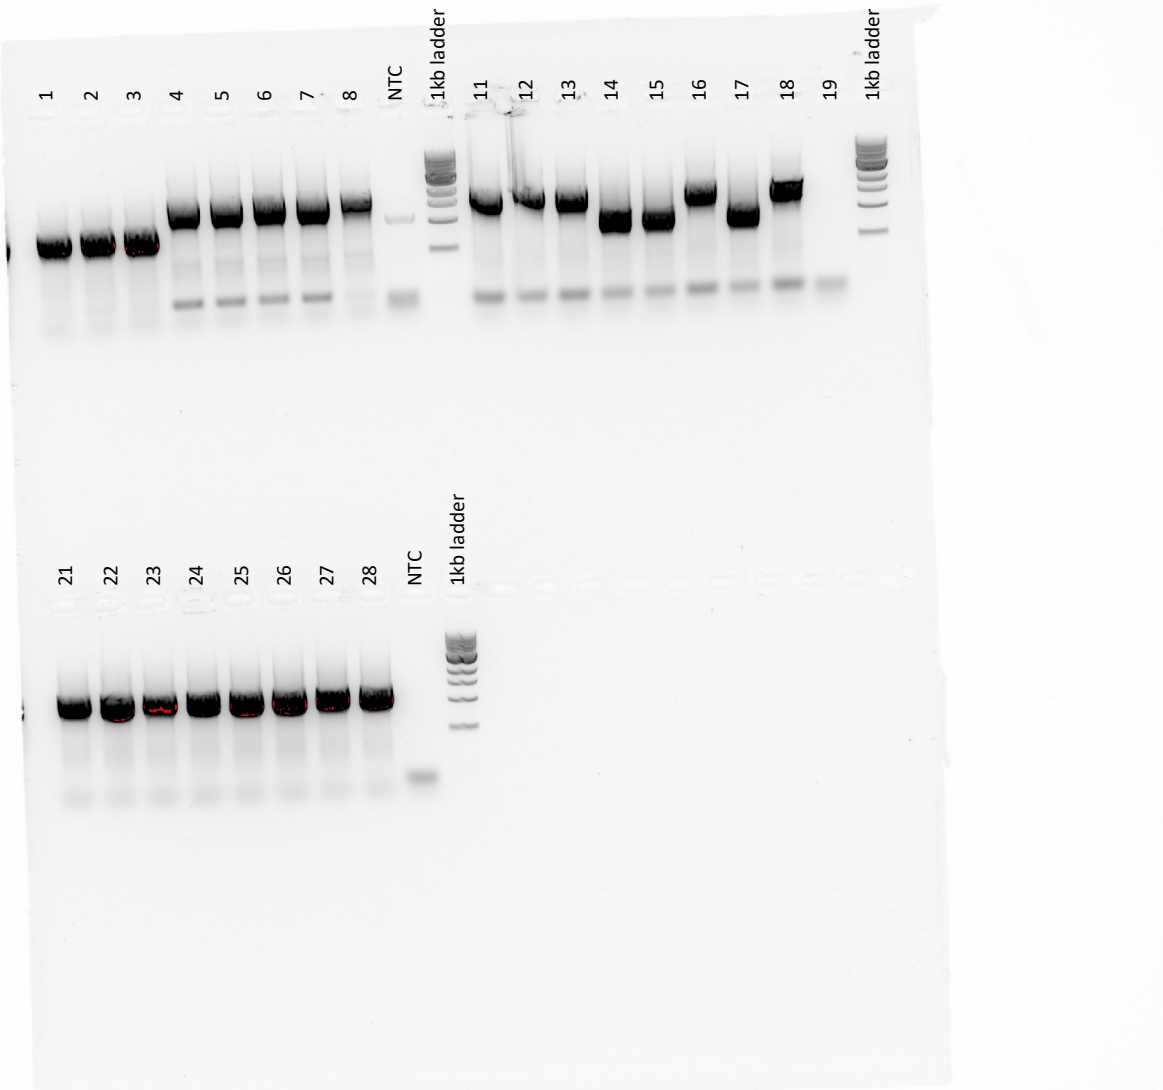

**Supplementary Figure 1 | Gel and immunoblots raw images. a-d, source images for Extended Data Fig. 4d-g. e, source image for Extended Data Fig. 4h.**

## IsoLCA Synthesis Procedure.

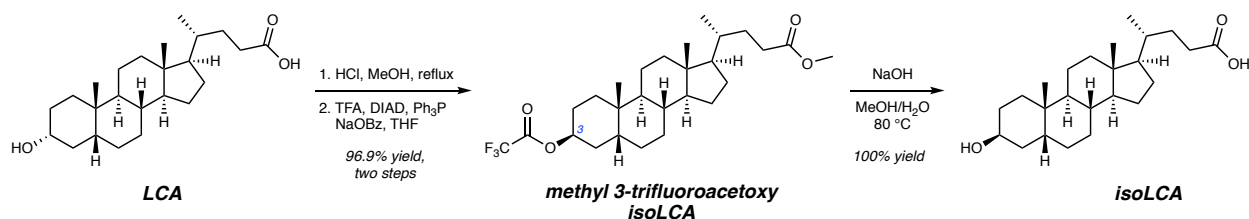

**IsoLCA.** Isolithocholic acid (isoLCA) was prepared from lithocholic acid (LCA) by carboxylic acid protection, then C3 alcohol inversion<sup>56</sup>, followed by ester cleavage. Methanol (125 mL, 0.25 M) and HCl (622  $\mu$ L of 1 M solution in methanol, 0.622 mmol, 0.02 equivalents) were added to a 500 mL round-bottom flask containing lithocholic acid (11.71 g, 31.10 mmol, 1 equivalent) and a stir bar. A reflux condenser was affixed to the flask and the contents were brought to reflux by immersion in a 90 °C oil bath with mixing. Upon completion by TLC analysis (1:1 hexanes/ethyl acetate; *p*-Anisaldehyde; overnight), the flask was cooled to room temperature and concentrated in vacuo. The resulting solid was further dried under high vacuum to afford methyl lithocholate as a free-flowing white solid (12.143 g, 31.087 mmol, 100% yield).  $R_f = 0.35$  (2:1 hexanes/ethyl acetate; *p*-Anisaldehyde); mp = 130–132 °C (lit.<sup>3</sup> mp 130–132 °C); <sup>1</sup>H NMR (600 MHz, CDCl<sub>3</sub>):  $\delta$  3.66 (s, 3H), 3.62 (td,  $J = 10.9, 5.3$  Hz, 1H), 2.35 (ddd,  $J = 15.4, 10.2, 5.1$  Hz, 1H), 2.22 (ddd,  $J = 15.7, 9.9, 6.5$  Hz, 1H), 1.95 (dt,  $J = 12.4, 3.2$  Hz, 1H), 1.88–1.73 (m, 5H), 1.68–1.64 (m, 1H), 1.59–1.55 (m, 1H), 1.53–1.49 (m, 1H), 1.43–1.19 (m, 12H), 1.16–1.03 (m, 5H), 0.97 (td,  $J = 14.2, 3.4$  Hz, 1H), 0.92 (s, 3H), 0.91 (d,  $J = 6.5$  Hz, 3H), 0.64 (s, 3H); HRMS (DART+)  $m/z$ :  $[M + NH_4]^+$  calculated for C<sub>25</sub>H<sub>46</sub>O<sub>3</sub>N 408.3478, found 408.3468;  $[\alpha]_D^{21.3} +30.62$  (c 1.07, CH<sub>2</sub>Cl<sub>2</sub>). All other compound data are consistent with reported values<sup>57,58</sup>.

Tetrahydrofuran (105 mL, 0.3 M) was added to a flame-dried 500 mL round-bottom flask charged with methyl lithocholate (12.332 g, 31.571 mmol, 1 equivalent) and a stir bar under

argon. To this colorless solution was added diisopropyl azodicarboxylate (DIAD: 6.84 mL, 34.73 mmol, 1.1 equivalents) and trifluoroacetic acid (TFA: 2.66 mL, 34.73 mmol, 1.1 equivalents), and the flask was placed in a room temperature water bath ( $T = 21\text{ }^{\circ}\text{C}$ ). Addition of triphenylphosphine ( $\text{Ph}_3\text{P}$ : 9.108 g, 34.73 mmol, 1.1 equivalents) to this bright orange solution resulted in a rapid color fading. Sodium benzoate ( $\text{NaOBz}$ : 5.005 g, 34.73 mmol, 1.1 equivalents) was then added and the white suspension was thoroughly mixed at room temperature. Upon completion by TLC analysis (2:1 hexanes/ethyl acetate; *p*-Anisaldehyde; ca. 4 h), hexanes (65 mL) were added. After mixing for at least 15 min, the reaction was filtered through a medium porosity Buchner funnel and the cloudy filtrate was concentrated in vacuo to yield an off-white solid. This crude solid (comprised of desired product,  $\text{Ph}_3\text{PO}$ , and reduced DIAD) was dissolved in  $\text{CH}_2\text{Cl}_2$  (ca. 150 mL), dry-loaded onto a mixture of Celite (15 g) and  $\text{SiO}_2$  (90 g), and purified by flash chromatography (6 x 21 cm  $\text{SiO}_2$ , 10% ethyl acetate in hexanes; collect fractions in 125–250 mL Erlenmeyer flasks) to afford methyl 3-trifluoroacetoxy isolithocholate as a white crystalline solid (14.885 g, 30.589 mmol, 96.9% yield).  $R_f = 0.37$  (9:1 hexanes/ethyl acetate; *p*-Anisaldehyde); mp 142–145  $^{\circ}\text{C}$ ;  $^1\text{H}$  NMR (600 MHz,  $\text{CDCl}_3$ ):  $\delta$  5.30 (br s, 1H), 3.66 (s, 3H), 2.35 (ddd,  $J = 15.4, 10.2, 5.2$  Hz, 1H), 2.22 (ddd,  $J = 15.8, 9.9, 6.5$  Hz, 1H), 2.05 (ddd,  $J = 15.7, 13.5, 2.9$  Hz, 1H), 1.99–1.96 (m, 1H), 1.93–1.77 (m, 3H), 1.73–1.53 (m, 6H), 1.46–1.26 (m, 9H), 1.21–1.00 (m, 6H), 0.98 (s, 3H), 0.91 (d,  $J = 6.5$  Hz, 3H), 0.65 (s, 3H).;  $^{13}\text{C}\{^1\text{H}\}$  NMR (151 MHz,  $\text{CDCl}_3$ ):  $\delta$  174.9, 157.1 (q,  $J = 41.6$  Hz), 114.8 (q,  $J = 286.2$  Hz), 76.7, 56.7, 56.1, 51.6, 42.9, 40.3, 40.1, 37.3, 35.7, 35.5, 35.0, 31.2, 31.1, 30.5, 30.4, 28.3, 26.4, 26.2, 24.8, 24.3, 23.8, 21.2, 18.4, 12.2;  $^{19}\text{F}$  NMR (376 MHz,  $\text{CDCl}_3$ ):  $\delta$  –75.4 (s); IR (ATR): 2973, 2929, 1777, 1737, 1435, 1213, 1185, 1152, 859  $\text{cm}^{-1}$ ; HRMS (DART+)  $m/z$ :  $[\text{M} + \text{NH}_4]^+$  calculated for  $\text{C}_{27}\text{H}_{45}\text{O}_4\text{F}_3\text{N}$  504.3301, found 504.3289;  $[\alpha]_{\text{D}}^{22.0} +15.95$  (c 1.08,  $\text{CH}_2\text{Cl}_2$ ). NMR spectra are shown in **Supplementary Fig. 2, 3** and **4**.

Methanol (146 mL),  $\text{H}_2\text{O}$  (29 mL; 5:1 methanol: $\text{H}_2\text{O}$ , 0.1 M), and NaOH (4.24 g, 106 mmol, 3 equivalents) were added to a 1 L round-bottom flask charged with methyl 3-trifluoroacetoxy

isoLCA (17.254 g, 35.312 mmol, 1 equivalent) and a stir bar. A reflux condenser was affixed to the flask, and the contents were placed under argon and warmed in an 80 °C oil bath with mixing. The suspension turned homogeneous over an hour. Upon reaction completion by TLC analysis (2:1 hexanes/EtOAc; *p*-Anisaldehyde; ca. 3 h), the flask was cooled to room temperature and methanol was removed in vacuo to yield a viscous slurry. H<sub>2</sub>O (400 mL) was added to this slurry and the contents were sonicated, followed by acidification to pH < 3 with 1 M HCl (ca. 125 mL). The precipitate was sonicated for at least 10 min to ensure a free-flowing solid, then cooled in an ice bath and isolated via vacuum filtration. Washing and further drying of the filter cake (air, then 110 °C oven over night, then high vacuum) yielded isolithocholic acid as a powdery white solid (13.419 g, 35.634 mmol, 100% yield).

**Characterization data**<sup>59</sup>:  $R_f = 0.12$  (1:1 hexanes/ethyl acetate; *p*-Anisaldehyde); mp 154–158 °C; <sup>1</sup>H NMR (600 MHz, CD<sub>3</sub>OD): δ 4.03 (p,  $J = 2.7$  Hz, 1H), 2.32 (ddd,  $J = 15.2, 9.8, 5.3$  Hz, 1H), 2.19 (ddd,  $J = 15.7, 9.5, 6.9$  Hz, 1H), 2.01 (dq,  $J = 13.8, 3.0$  Hz, 2H), 1.97–1.85 (m, 2H), 1.79 (dddd,  $J = 13.1, 9.8, 6.9, 2.8$  Hz, 1H), 1.77–1.72 (m, 1H), 1.60 (dtd,  $J = 10.9, 6.1, 5.5, 3.3$  Hz, 1H), 1.56 (ddd,  $J = 14.2, 4.7, 2.5$  Hz, 1H), 1.49–1.38 (m, 8H), 1.35–1.26 (m, 4H), 1.22–1.06 (m, 6H), 0.97 (s, 3H), 0.95 (d,  $J = 6.6$  Hz, 3H), 0.69 (s, 3H); <sup>13</sup>C{<sup>1</sup>H} NMR (151 MHz, CD<sub>3</sub>OD): δ 178.2, 67.8, 58.0, 57.5, 43.9, 41.6, 41.1, 37.8, 37.1, 36.7, 36.2, 34.4, 32.3, 32.01, 31.0, 29.2, 28.5, 27.9, 27.4, 25.3, 24.4, 22.2, 18.8, 12.5; IR (ATR): 3232, 2922, 2864, 1710, 1442, 1217, 1038, 957 cm<sup>-1</sup>; HRMS (DART–)  $m/z$ :  $[M - H]^-$  calculated for C<sub>24</sub>H<sub>39</sub>O<sub>3</sub> 375.2899, found 375.2908;  $[\alpha]_D^{22.4} +26.3$  ( $c$  0.805, CH<sub>3</sub>OH). NMR spectra are shown in **Supplementary Fig. 5** and **6**.

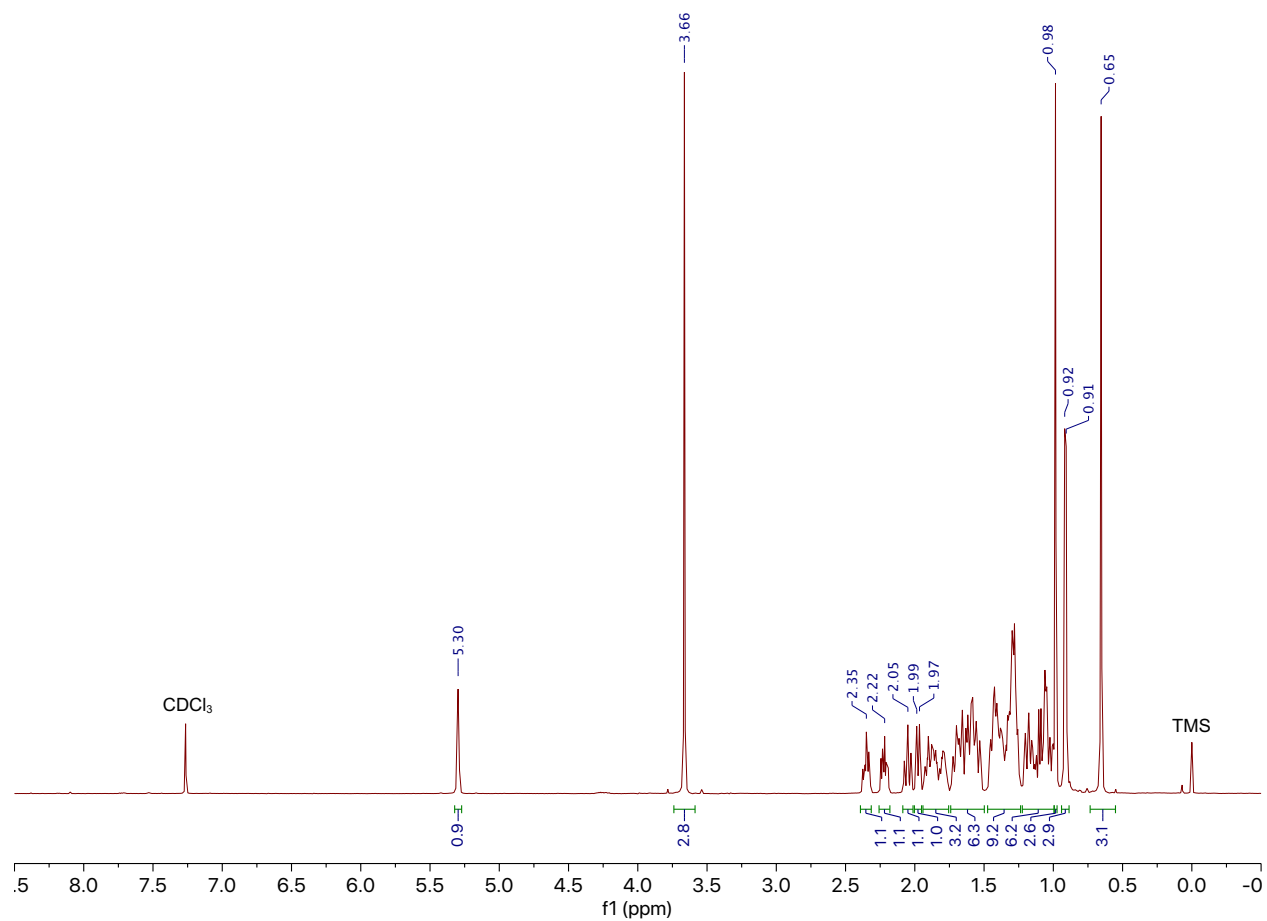

**Supplementary Figure 2 | <sup>1</sup>H NMR spectrum (600 MHz, CDCl<sub>3</sub>) of methyl 3-trifluoroacetoxy isolithocholate.** The compound data and spectrum of methyl 3-trifluoroacetoxy isolithocholate are representative of at least six synthesis experiments.

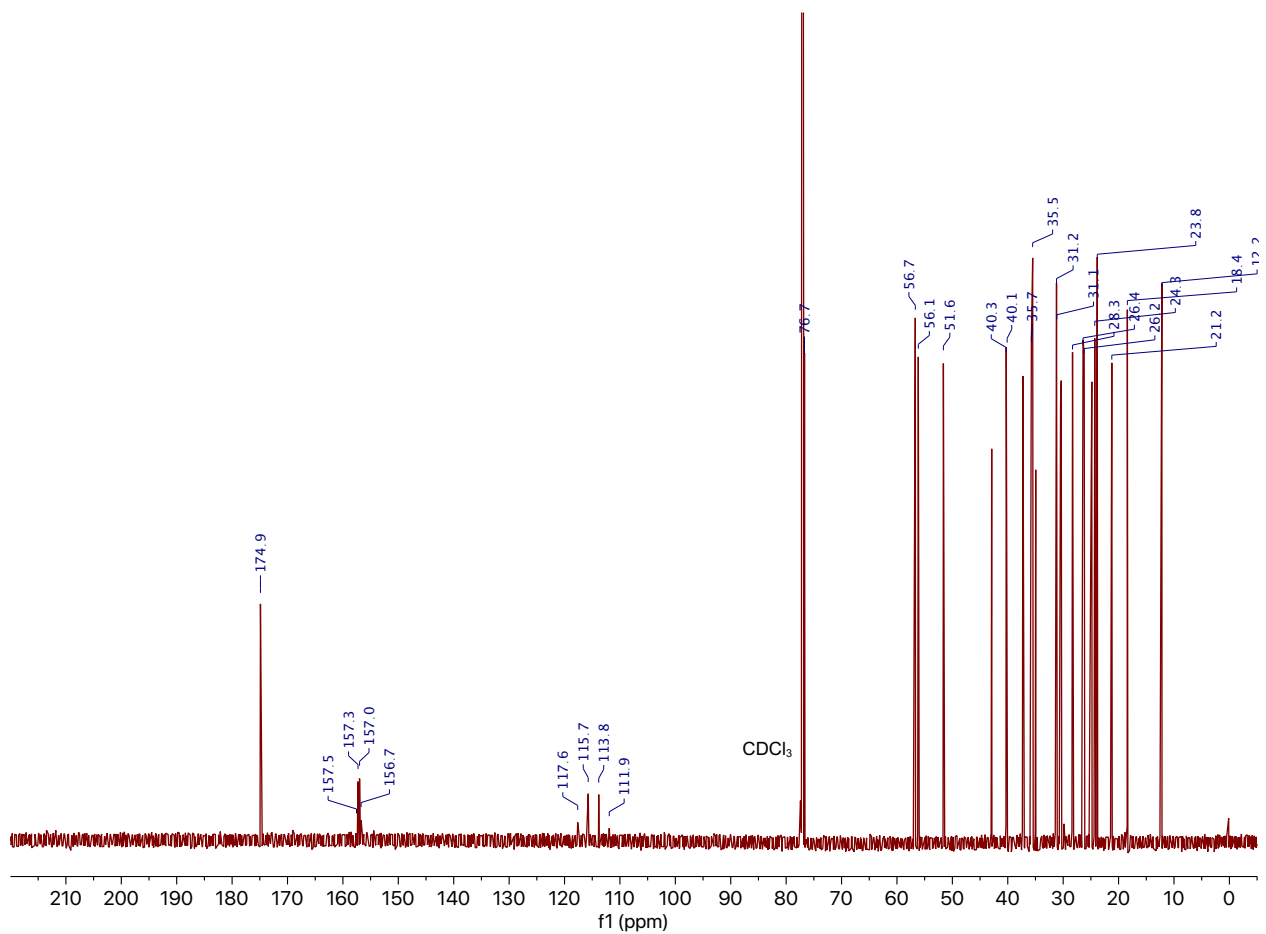

**Supplementary Figure 3 |  $^{13}\text{C}\{^1\text{H}\}$  NMR spectrum (151 MHz, CDCl<sub>3</sub>) of methyl 3-trifluoroacetoxy isolithocholate.** The compound data and spectrum of methyl 3-trifluoroacetoxy isolithocholate are representative of at least six synthesis experiments.

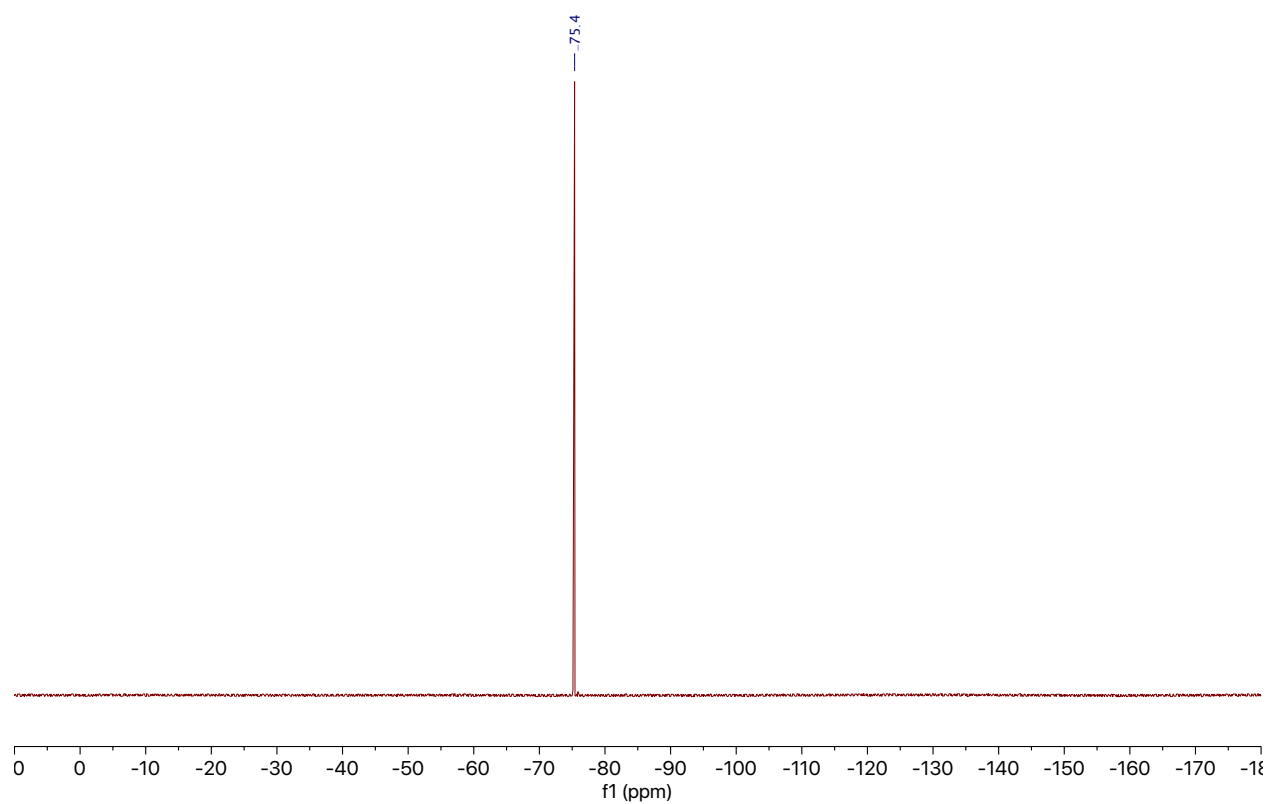

**Supplementary Figure 4 |  $^{19}\text{F}$  NMR spectrum (376 MHz,  $\text{CDCl}_3$ ) of methyl 3-trifluoroacetoxy isolithocholate.** The compound data and spectrum of methyl 3-trifluoroacetoxy isolithocholate are representative of at least six synthesis experiments.



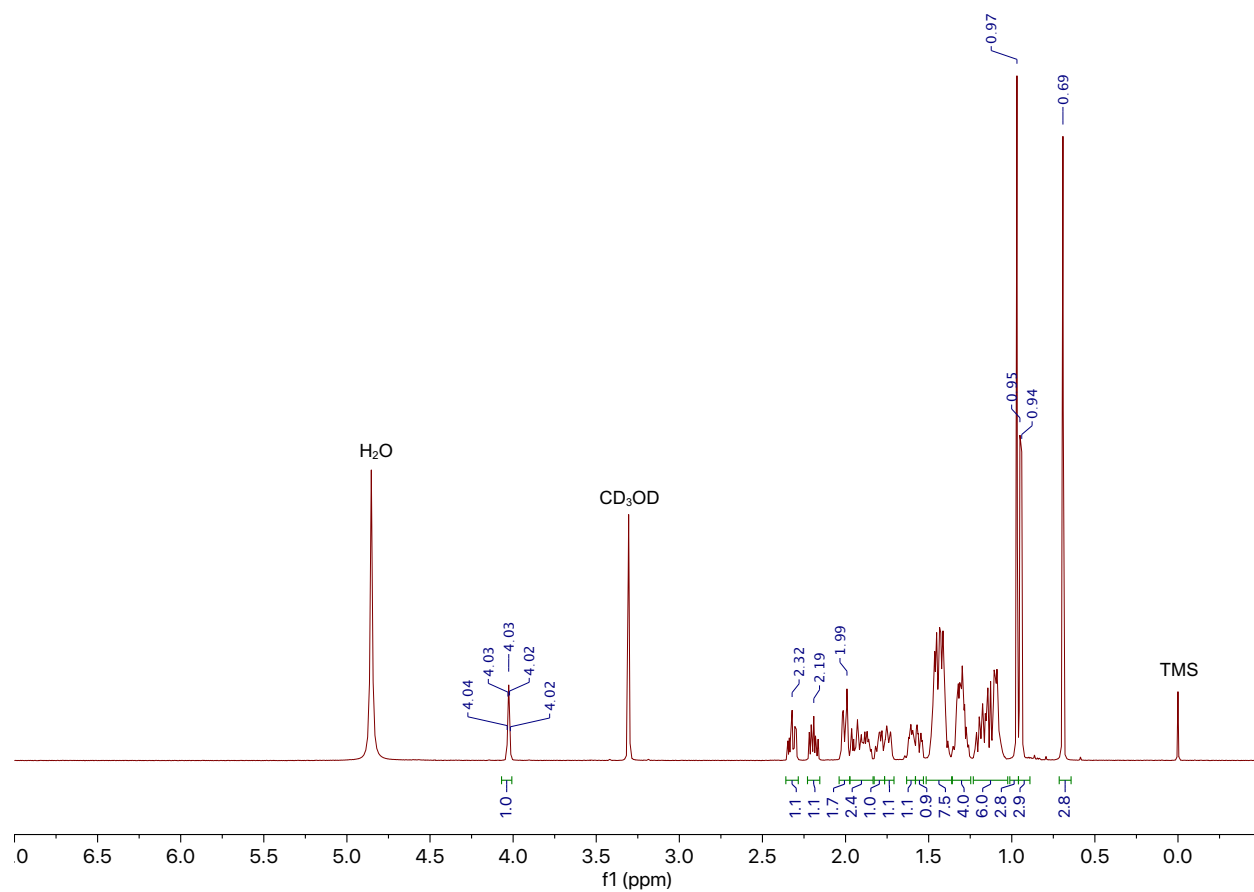

**Supplementary Figure 5 | <sup>1</sup>H NMR spectrum (600 MHz, CD<sub>3</sub>OD) of isolithocholic acid.**

The compound data and spectrum of isoLCA are representative of four synthesis experiments.

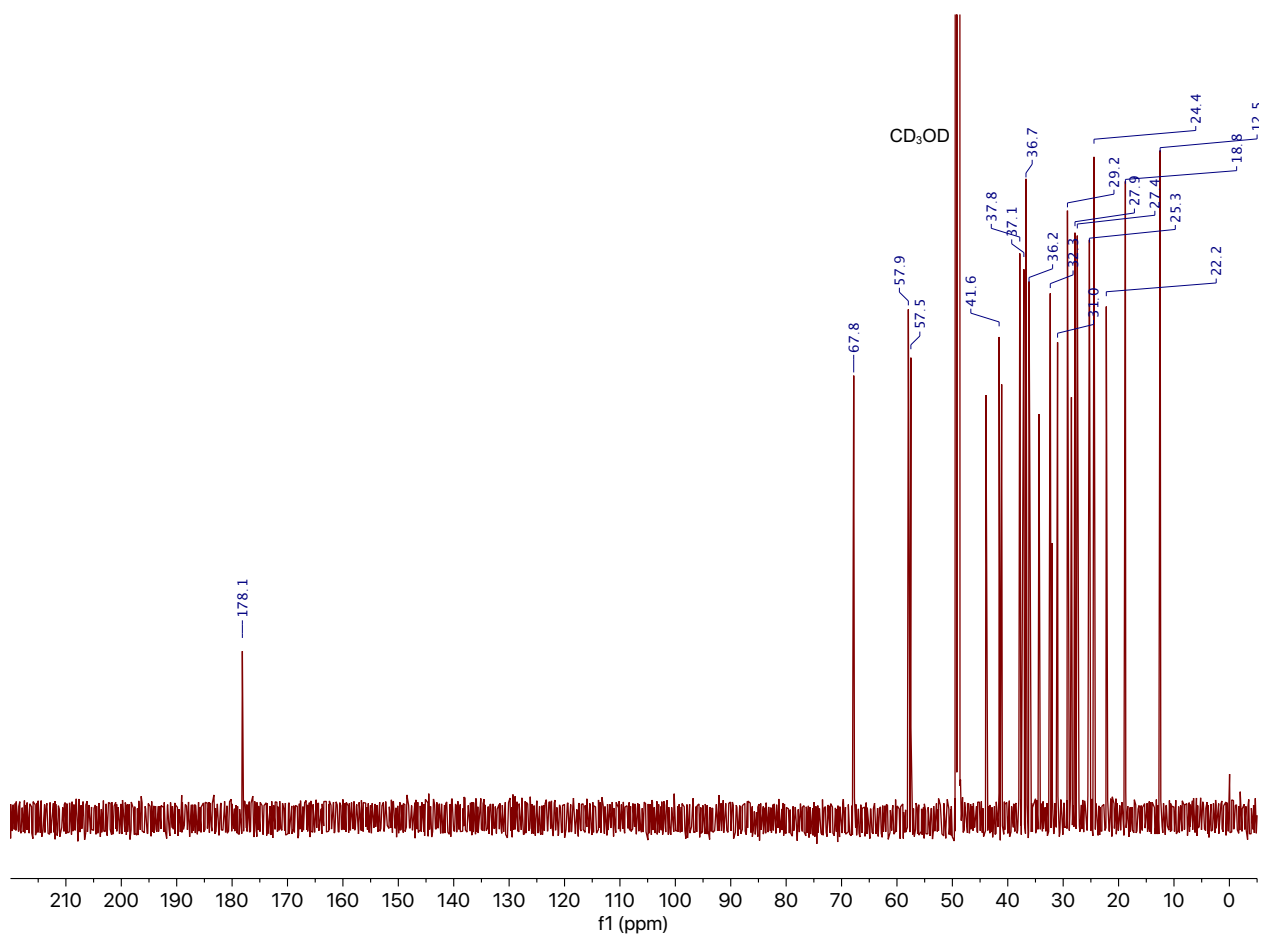

**Supplementary Figure 6 |  $^{13}\text{C}\{^1\text{H}\}$  NMR spectrum (151 MHz, CD<sub>3</sub>OD) of isolithocholic acid.** The compound data and spectrum of isoLCA are representative of four synthesis experiments.

**a** In vitro T cell gating strategy

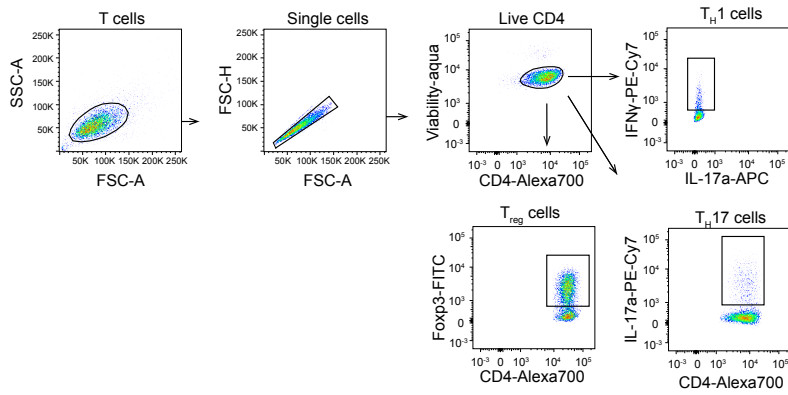

**b** In vivo lamina propria T cell gating strategy

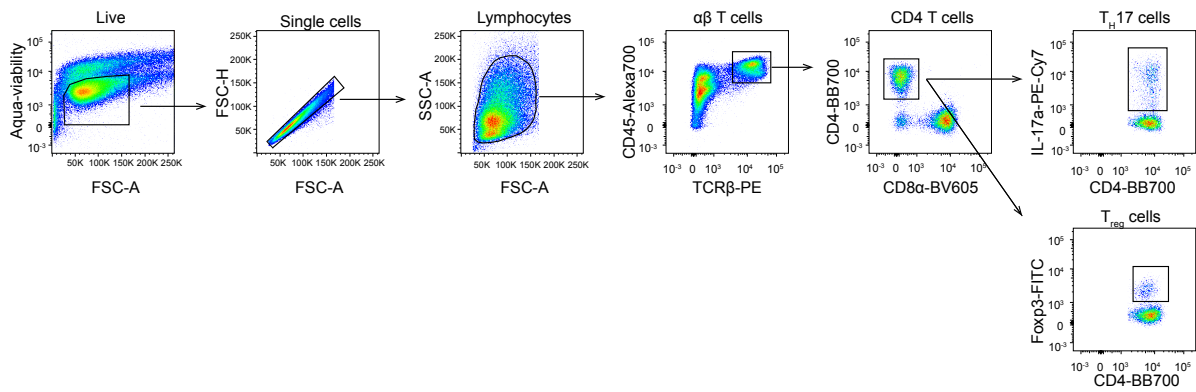

**Supplementary Figure 7 |** Gating strategy for the flow cytometric analyses of in vitro cultured T cells (a) and in vivo derived cells from the lamina propria (b).



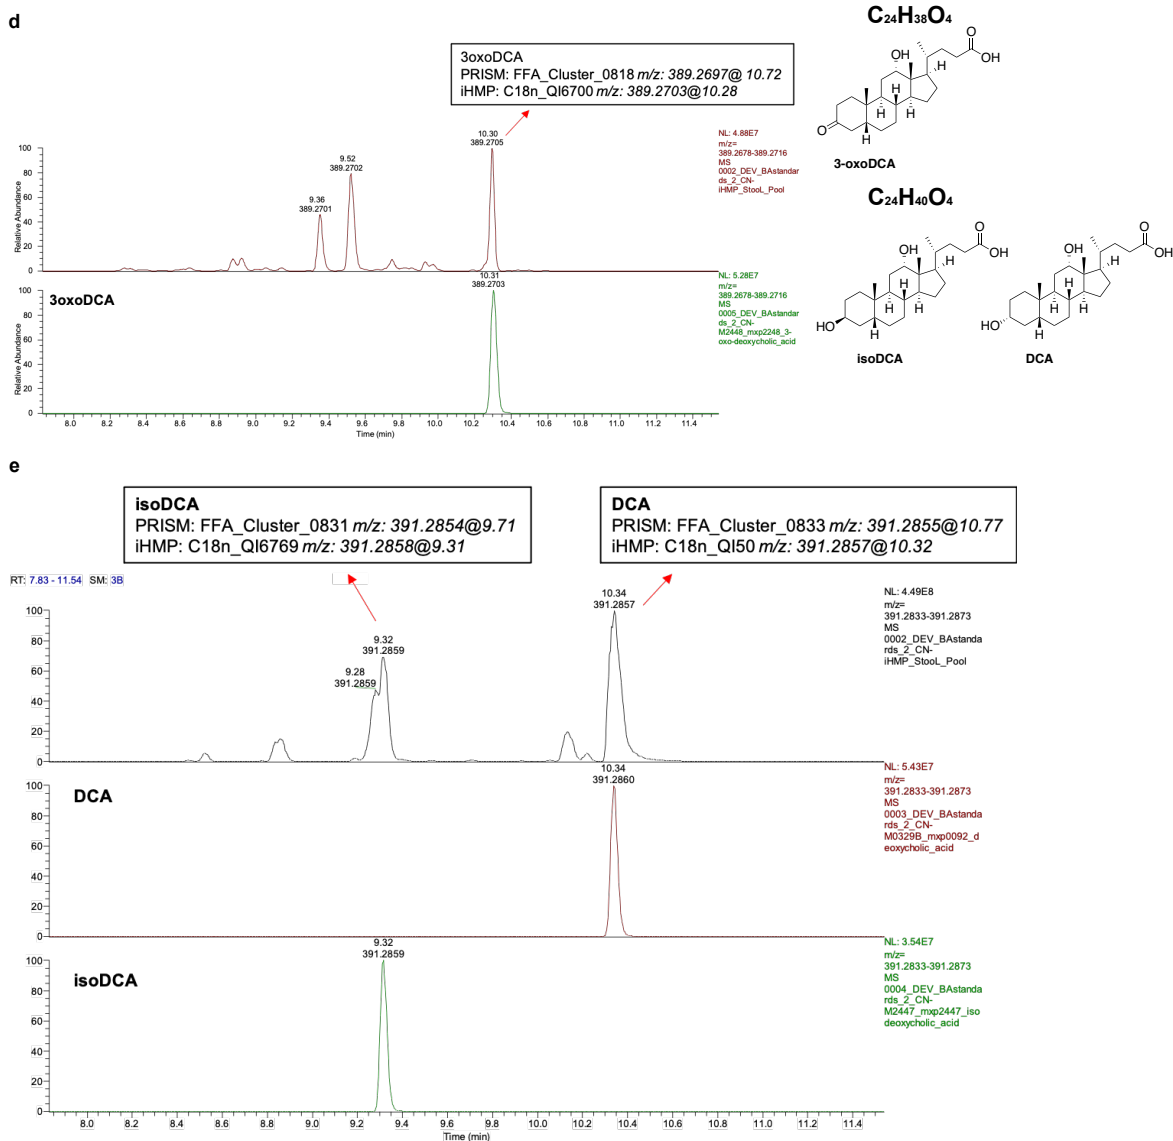

**Supplementary Figure 8 | Identification of modified LCAs and DCAs mapped to PRISM and HMP2 metabolome database.** **a**, EIC of molecules of interest run alongside the HMP2 stool pool. **b**, Additional features (adducts and fragments) were detected for the LCA isomers. Among the strongest signals was one corresponding to the formation of a dimer (2M-H). Unlike the M-H, this dimer  $m/z$  was integrated for all compounds in the non-targeted data in HMP2. This feature is not reported in PRISM because the method used had a narrower  $m/z$  range. **c**, Summary table of modified LCAs in PRISM and HMP2. **d**, EIC of 3-oxoDCA run alongside the HMP2 stool pool. **e**, EIC of isoDCA and DCA run alongside the HMP2 stool pool.

## - Supplementary Tables

Supplementary Table 1 | Key Reagent Table

|                                                                          |                    |             |
|--------------------------------------------------------------------------|--------------------|-------------|
| <b>Chemicals</b>                                                         |                    |             |
| DMSO                                                                     | Sigma              | D8418       |
| Ethyl acetate                                                            | Sigma              | 319902      |
| HCl                                                                      | Sigma              | 258148      |
| Methanol                                                                 | EMD Millipore      | MX0475      |
| Ethanol                                                                  | Sigma              | E7023       |
| PBS                                                                      | Genesee Scientific | 25-507      |
| Vitamin K1-hemin                                                         | BD Biosciences     | 212354      |
| Trace minerals                                                           | ATCC               | MD-TMS      |
| Trace vitamins                                                           | ATCC               | MD-VS       |
| FBS                                                                      | Genesee Scientific | 25-514      |
| Cellobiose                                                               | Sigma              | C7252       |
| Maltose                                                                  | Sigma              | M5895       |
| Fructose                                                                 | Sigma              | F0127       |
| Arginine                                                                 | Sigma              | A5006       |
| Yeast extract                                                            | Bacto              | 212750      |
| Malt extract                                                             | Sigma              | 70146       |
| Dextrose                                                                 | Sigma              | G5767       |
| Phorbol 12-myristate 13-acetate (PMA)                                    | Sigma              | P1585       |
| Ionomycin                                                                | Sigma              | I3909       |
| GolgiPlug                                                                | BD Biosciences     | 555029      |
| Liberase TM                                                              | Sigma              | 5401127001  |
| Dnase I (grade II, from bovine pancreas)                                 | Sigma              | 10104159001 |
| <b>Bile acids</b>                                                        |                    |             |
| LCA                                                                      | Sigma              | L6250       |
| 3-oxoLCA                                                                 | Steraloids         | C1750-000   |
| IsoLCA                                                                   | Steraloids         | C1475-000   |
| IsoalloLCA                                                               | Steraloids         | C0700-000   |
| AlloLCA                                                                  | Steraloids         | C0680-000   |
| T-LCA                                                                    | Steraloids         | C1472-000   |
| DCA                                                                      | Sigma              | D2510       |
| 3-oxoDCA                                                                 | Steraloids         | C1725-000   |
| IsoDCA                                                                   | Steraloids         | C1165-000   |
| CDCA                                                                     | AstaTech           | 76487       |
| TCA                                                                      | Sigma              | T4009       |
| $\beta$ MCA                                                              | Steraloids         | C1895-000   |
| GCA                                                                      | Sigma              | G2878       |
| <b>Antibodies</b>                                                        |                    |             |
| <i>For flow cytometry; specific folocs are indicated in the figures.</i> |                    |             |
| Anti-IL-17a (eBio17B7)                                                   | eBioscience        | 25-7177-82  |
| Anti-FoxP3 (FJK-16s)                                                     | eBioscience        | 11-5773-82  |
| Anti-ROR $\gamma$ t (B2D)                                                | eBioscience        | 17-6981-82  |
| Anti-IFN $\gamma$ (XMG1.2)                                               | eBioscience        | 48-7311-82  |
| Anti-CD3 $\epsilon$ (145-2C11)                                           | eBioscience        | 48-0031-82  |

**Supplementary Table 1 | Key Reagent Table (continued)**

|                                                          |                       |            |
|----------------------------------------------------------|-----------------------|------------|
| Anti-CD25 (PC61.5)                                       | eBioscience           | 25-0251-82 |
| Anti-CD62L (MEL-14)                                      | eBioscience           | 11-0621-85 |
| Anti-CD4 (RM4-5)                                         | eBioscience           | 56-0042-82 |
| Anti-CD45 (30-F11)                                       | Biolegend             | 103128     |
| Anti-CD8 $\alpha$ (53-6.7)                               | Biolegend             | 100744     |
| Anti-CD19 (6D5)                                          | Biolegend             | 115540     |
| Anti-CD44 (IM7)                                          | Biolegend             | 103032     |
| Anti-CD4 (RM4-5)                                         | BD                    | 566407     |
| <i>For in vitro T cell culture</i>                       |                       |            |
| Anti-CD3 $\epsilon$ (145-2C11)                           | eBioscience           | 16-0031-82 |
| Anti-CD28 (37.51)                                        | eBioscience           | 16-0281-82 |
| Anti-hamster IgG (whole molecule) goat affinity-purified | MPBio                 | 856984     |
| <i>For western blotting</i>                              |                       |            |
| Anti-His-tag Antibody (rabbit polyclonal)                | Cell Signaling        | 2365       |
| <b>Cytokines</b>                                         |                       |            |
| Human IL-2                                               | PEPROTECH             | 200-02     |
| Mouse IL-6                                               | eBioscience           | 14-8061-62 |
| Mouse IL-12                                              | PEPROTECH             | 210-12     |
| Human TGF $\beta$ 1                                      | PEPROTECH             | 100-21     |
| <b>Primers</b>                                           |                       |            |
| 16s_ElentaF                                              | CAGCAGGGAAGAAATTCGAC  |            |
| 16s_ElentaR                                              | TTGAGCCCTCGGATTAGAGA  |            |
| 16s_BragilisF                                            | TGTAACACGTGTGTAGCCCC  |            |
| 16s_BragilisR                                            | GGTTATGCTGAGGACTCTAG  |            |
| 16s_RgnavusF                                             | GGTAGTTGGTGGGGTAACGG  |            |
| 16s_RgnavusR                                             | TGTCTCAGTCCCAATGTGGC  |            |
| 16s_CinnocuumF                                           | CAGCTCGTGTTCGTGAGATGT |            |
| 16s_CinnocuumR                                           | CTCGCATGAGTCCCCAACTT  |            |

**Supplementary Table 2 | Human isolate screen metatables.** Table fields in the 1-10 sheets named PLATE1 through PLATE11 indicate eleven 96-well plates containing 990 colonies from two patients' stool samples were collected (Methods). Assays were performed in replicate plates using either 100  $\mu$ M LCA or 100  $\mu$ M 3-oxoLCA as the substrate. Conversion rates in percentage for each well are shown in yellow gradient highlights for 3 $\alpha$ -HSDH activity and green gradient highlights for 3 $\beta$ -HSDH activity. Table fields in the 12-13 sheets follow the similar format as the previous eleven sheets for the positive bacterial metabolizers verified in the bacterial culture tubes in triplicates. MS data was collected without specifying masses.

- PLATE1

## Sequence Summary Report

| Plate1 | 16S rDNA sequencing                               | LCA as substrate        |                       | 3-OxoLCA as substrate |                       |
|--------|---------------------------------------------------|-------------------------|-----------------------|-----------------------|-----------------------|
|        |                                                   | 3-OxoLCA production (%) | isoLCA production (%) | LCA production (%)    | isoLCA production (%) |
| P1-A1  | <i>Collinsella aerofaciens</i>                    | 0.44604                 | 0.00000               | 97.52560              | 0.04763               |
| P1-A10 | <i>Bacteroides fragilis</i>                       | 0.02749                 | 0.12314               | 23.64419              | 31.58931              |
| P1-A11 |                                                   | 0.04274                 | 0.06440               | 0.00000               | 0.00000               |
| P1-A12 |                                                   | 0.09501                 | 0.00000               | 0.08520               | 0.00000               |
| P1-A2  | <i>Collinsella aerofaciens</i>                    | 0.02380                 | 0.09519               | 34.13654              | 5.18806               |
| P1-A3  | <i>Collinsella aerofaciens</i>                    | 0.33216                 | 0.00000               | 97.35310              | 0.03396               |
| P1-A4  | <i>Catenibacterium mitsuokai</i>                  | 0.03153                 | 0.03378               | 0.02209               | 91.11984              |
| P1-A5  | <i>Collinsella aerofaciens</i>                    | 0.14841                 | 0.03544               | 98.09128              | 0.00000               |
| P1-A6  | <i>Collinsella aerofaciens</i>                    | 0.25392                 | 0.03681               | 97.84818              | 0.05627               |
| P1-A7  |                                                   | 0.00000                 | 0.00000               | 0.12799               | 0.83481               |
| P1-A8  | <i>Collinsella aerofaciens</i>                    | 0.21991                 | 0.00000               | 83.22174              | 0.00000               |
| P1-A9  | <i>Collinsella aerofaciens</i>                    | 0.12935                 | 0.05605               | 35.99106              | 5.64579               |
| P1-B1  | <i>Bacteroides cellulosilyticus</i>               | 0.02744                 | 0.00000               | 97.30672              | 0.06369               |
| P1-B10 | <i>Streptococcus salivarius</i>                   | 0.43195                 | 0.00000               | 5.09541               | 1.14501               |
| P1-B11 |                                                   | 0.02002                 | 0.12977               | 0.00000               | 1.06125               |
| P1-B12 | <i>Bacteroides dorei</i>                          | 0.06070                 | 0.00000               | 1.43275               | 9.54963               |
| P1-B2  |                                                   | 0.03586                 | 0.05186               | 0.04441               | 21.90368              |
| P1-B3  | <i>Collinsella aerofaciens</i>                    | 0.04314                 | 0.02988               | 97.75235              | 0.07245               |
| P1-B4  |                                                   | 0.03052                 | 0.00000               | 0.04674               | 0.02771               |
| P1-B5  | <i>Collinsella aerofaciens</i>                    | 0.19071                 | 0.00000               | 98.24994              | 0.08661               |
| P1-B6  | <i>Collinsella aerofaciens</i>                    | 0.18698                 | 0.04394               | 98.22308              | 0.13030               |
| P1-B7  | <i>Collinsella aerofaciens</i>                    | 0.05210                 | 0.10616               | 33.89225              | 4.82254               |
| P1-B8  | <i>Bacteroides cellulosilyticus/ intestinalis</i> | 0.02399                 | 0.10406               | 0.00000               | 19.78247              |
| P1-B9  | <i>Collinsella aerofaciens</i>                    | 0.00000                 | 0.05178               | 33.02611              | 4.59280               |
| P1-C1  | <i>Bacteroides vulgatus</i>                       | 0.11860                 | 0.50134               | 94.94904              | 2.27888               |
| P1-C10 | <i>Collinsella aerofaciens</i>                    | 0.09886                 | 0.04715               | 33.83207              | 5.07079               |
| P1-C11 | <i>Bacteroides vulgatus</i>                       | 0.00000                 | 0.08015               | 2.67418               | 7.53473               |
| P1-C12 |                                                   | 0.12093                 | 0.00000               | 0.01887               | 0.11314               |
| P1-C2  | <i>Bacteroides cellulosilyticus</i>               | 0.13438                 | 0.07398               | 97.55771              | 0.00000               |
| P1-C3  | <i>Bifidobacterium longum</i>                     | 1.05545                 | 0.00000               | 11.21356              | 16.90184              |
| P1-C4  | <i>Collinsella aerofaciens</i>                    | 0.03670                 | 0.04099               | 1.06936               | 0.00000               |



## Sequence Summary Report

|        |                                                   |         |         |          |          |
|--------|---------------------------------------------------|---------|---------|----------|----------|
| P1-C5  | <i>Collinsella aerofaciens</i>                    | 0.11097 | 0.05688 | 33.57453 | 5.04727  |
| P1-C6  | <i>Collinsella aerofaciens</i>                    | 0.13993 | 0.05684 | 33.98396 | 5.02675  |
| P1-C7  | <i>Collinsella aerofaciens</i>                    | 0.02790 | 0.00000 | 33.84925 | 4.72375  |
| P1-C8  | <i>Collinsella aerofaciens</i>                    | 0.08036 | 0.04408 | 97.56328 | 0.26278  |
| P1-C9  | <i>Collinsella aerofaciens</i>                    | 0.15869 | 0.02868 | 82.28676 | 0.00000  |
| P1-D1  |                                                   | 0.11188 | 0.08829 | 0.22668  | 2.20661  |
| P1-D10 | <i>Collinsella aerofaciens</i>                    | 0.07922 | 0.02980 | 32.73685 | 4.91519  |
| P1-D11 |                                                   | 0.00000 | 0.00000 | 0.00000  | 31.10003 |
| P1-D12 |                                                   | 0.08476 | 0.20323 | 0.00858  | 0.00000  |
| P1-D2  | <i>Bacteroides uniformis</i>                      | 0.05365 | 0.03028 | 0.00000  | 28.13904 |
| P1-D3  | <i>Collinsella aerofaciens</i>                    | 0.20849 | 0.00000 | 98.11412 | 0.00000  |
| P1-D4  | <i>Bacteroides cellulosilyticus</i>               | 0.02121 | 0.07653 | 0.00000  | 27.95430 |
| P1-D5  |                                                   | 0.01667 | 0.03098 | 0.08488  | 0.57821  |
| P1-D6  | <i>Collinsella aerofaciens</i>                    | 0.02126 | 0.06600 | 97.97734 | 0.00000  |
| P1-D7  | <i>Bacteroides cellulosilyticus</i>               | 0.02476 | 0.07838 | 0.00000  | 28.68572 |
| P1-D8  | <i>Parabacteroides merdae</i>                     | 0.02301 | 0.05161 | 0.00000  | 17.86859 |
| P1-D9  | <i>Collinsella aerofaciens</i>                    | 0.03792 | 0.03596 | 6.92291  | 1.38880  |
| P1-E1  | <i>Collinsella aerofaciens</i>                    | 0.04253 | 0.03403 | 36.19458 | 5.75837  |
| P1-E10 |                                                   | 0.02118 | 0.00000 | 0.01217  | 0.03165  |
| P1-E11 | <i>Collinsella aerofaciens</i>                    | 0.34342 | 0.00000 | 99.39099 | 0.10886  |
| P1-E12 | <i>Collinsella aerofaciens</i>                    | 0.27301 | 0.13269 | 99.88469 | 0.08919  |
| P1-E2  |                                                   | 0.00000 | 0.11259 | 0.00000  | 0.24271  |
| P1-E3  | <i>Collinsella aerofaciens</i>                    | 0.01720 | 0.02635 | 99.77632 | 0.00000  |
| P1-E4  |                                                   | 0.02336 | 0.00000 | 0.01630  | 0.07094  |
| P1-E5  | <i>Collinsella aerofaciens</i>                    | 0.17141 | 0.03486 | 91.61052 | 1.53582  |
| P1-E6  |                                                   | 0.00000 | 0.06590 | 0.48258  | 8.59895  |
| P1-E7  | <i>Collinsella aerofaciens</i>                    | 0.15425 | 0.10111 | 99.57845 | 0.08853  |
| P1-E8  |                                                   | 0.04396 | 0.03345 | 0.00000  | 14.44001 |
| P1-E9  | <i>Collinsella aerofaciens</i>                    | 0.05514 | 0.05776 | 31.01376 | 1.19468  |
| P1-F1  |                                                   | 0.03585 | 0.04717 | 0.31920  | 0.00000  |
| P1-F10 | <i>Bacteroides uniformis</i>                      | 0.02609 | 0.09498 | 0.00000  | 21.57717 |
| P1-F11 | <i>Collinsella aerofaciens</i>                    | 0.13779 | 0.00000 | 98.65641 | 0.09182  |
| P1-F12 | <i>Collinsella aerofaciens</i>                    | 0.00000 | 0.16891 | 33.63692 | 3.40649  |
| P1-F2  | <i>Bifidobacterium pseudocatenulatum</i>          | 0.08834 | 0.00000 | 1.73747  | 24.01944 |
| P1-F3  | <i>Bacteroides cellulosilyticus/ intestinalis</i> | 0.03397 | 0.03940 | 0.00000  | 27.15558 |
| P1-F4  |                                                   | 0.09185 | 0.02476 | 0.01002  | 0.09501  |
| P1-F5  |                                                   | 0.10864 | 0.02827 | 0.03360  | 0.33838  |

## Sequence Summary Report

|        |                                                       |         |         |          |          |
|--------|-------------------------------------------------------|---------|---------|----------|----------|
| P1-F6  | <i>Collinsella aerofaciens</i>                        | 0.02059 | 0.00000 | 98.14397 | 0.05338  |
| P1-F7  | <i>Bacteroides cellulosilyticus/ intestinalis</i>     | 0.06908 | 0.03878 | 0.00000  | 26.56359 |
| P1-F8  |                                                       | 0.02955 | 0.03666 | 0.00000  | 26.05974 |
| P1-F9  | <i>Collinsella aerofaciens</i>                        | 0.05560 | 0.07295 | 99.06028 | 0.11376  |
| P1-G1  | <i>Bacteroides cellulosilyticus</i>                   | 0.11790 | 0.02846 | 98.06354 | 0.26742  |
| P1-G10 | <i>Collinsella aerofaciens</i>                        | 0.21314 | 0.07202 | 99.33661 | 0.06390  |
| P1-G11 | <i>Collinsella aerofaciens</i>                        | 0.19963 | 0.00000 | 99.73534 | 0.08072  |
| P1-G12 | <i>Bacteroides cellulosilyticus</i>                   | 0.00000 | 0.00000 | 1.69723  | 1.08668  |
| P1-G2  | <i>Bacteroides rodentium</i>                          | 0.00000 | 0.04228 | 0.00000  | 26.91233 |
| P1-G3  |                                                       | 0.06964 | 0.00000 | 0.04478  | 0.05463  |
| P1-G4  | <i>Collinsella aerofaciens</i>                        | 0.09200 | 0.03686 | 99.37866 | 0.07556  |
| P1-G5  |                                                       | 0.04229 | 0.02481 | 0.00881  | 0.00000  |
| P1-G6  |                                                       | 0.04120 | 0.04161 | 0.02156  | 0.07405  |
| P1-G7  |                                                       | 0.02579 | 0.00000 | 0.55323  | 0.00000  |
| P1-G8  |                                                       | 0.13460 | 0.13430 | 0.13097  | 0.28562  |
| P1-G9  |                                                       | 0.13972 | 0.00000 | 0.01361  | 0.20632  |
| P1-H1  | <i>Bacteroides uniformis</i>                          | 0.04826 | 0.00000 | 0.04207  | 24.57614 |
| P1-H10 | <i>Collinsella aerofaciens</i>                        | 0.18343 | 0.05449 | 98.50101 | 0.07989  |
| P1-H11 |                                                       | 0.04622 | 0.00000 | 0.03578  | 0.04149  |
| P1-H12 | <i>Bacteroides sp. / Bacteroides cellulosilyticus</i> | 0.09583 | 0.16651 | 0.00000  | 16.34538 |
| P1-H2  | <i>Bifidobacterium longum</i>                         | 1.18248 | 0.00000 | 7.56200  | 12.50201 |
| P1-H3  | <i>Collinsella aerofaciens</i>                        | 0.27860 | 0.00000 | 97.97894 | 0.00000  |
| P1-H4  |                                                       | 0.02079 | 0.07200 | 0.02956  | 0.02814  |
| P1-H5  | <i>Catenibacterium mitsuokai/ Catenibacterium sp.</i> | 0.00000 | 0.12400 | 0.03176  | 85.95947 |
| P1-H6  |                                                       | 0.03371 | 0.04313 | 0.00920  | 0.02804  |
| P1-H7  |                                                       | 0.03182 | 0.00000 | 0.55225  | 1.71917  |
| P1-H8  | <i>Bifidobacterium longum</i>                         | 0.87125 | 0.00000 | 10.65127 | 16.71063 |
| P1-H9  | <i>Collinsella aerofaciens</i>                        | 0.14837 | 0.08053 | 99.50336 | 0.00000  |

## Sequence Summary Report

| Plate2 | 16S rDNA sequencing              | LCA as substrate        |                       | 3-OxoLCA as substrate |                       |
|--------|----------------------------------|-------------------------|-----------------------|-----------------------|-----------------------|
|        |                                  | 3-OxoLCA production (%) | isoLCA production (%) | LCA production (%)    | isoLCA production (%) |
| P2-A1  | <i>Roseburia faecis</i>          | 0.12362                 | 0.25781               | 2.35201               | 0.85601               |
| P2-A10 |                                  | 0.04265                 | 0.15479               | 0.00000               | 0.00000               |
| P2-A11 |                                  | 0.10892                 | 0.55658               | 0.00000               | 0.09692               |
| P2-A12 |                                  | 0.09747                 | 0.15616               | 0.26136               | 39.61100              |
| P2-A2  | <i>Lachnospira pectinoschiza</i> | 0.04369                 | 0.00000               | 0.03024               | 72.25347              |
| P2-A3  |                                  | 0.00000                 | 0.00000               | 0.78339               | 0.62250               |
| P2-A4  | <i>Murimonas intestini</i>       | 0.10093                 | 0.56119               | 3.95509               | 0.26514               |
| P2-A5  |                                  | 0.11654                 | 0.00000               | 0.00000               | 0.00000               |
| P2-A6  |                                  | 0.24784                 | 0.38302               | 0.00000               | 0.10160               |
| P2-A7  |                                  | 0.11079                 | 0.06529               | 0.10613               | 0.00000               |
| P2-A8  |                                  | 0.22618                 | 0.00000               | 0.00000               | 0.00000               |
| P2-A9  |                                  | 0.07968                 | 0.09809               | 0.04790               | 0.00000               |
| P2-B1  | <i>Roseburia faecis</i>          | 0.17984                 | 0.00000               | 1.98632               | 1.22241               |
| P2-B10 |                                  | 0.09287                 | 0.12224               | 0.00000               | 0.00000               |
| P2-B11 |                                  | 0.08035                 | 0.16093               | 0.00000               | 0.00000               |
| P2-B12 |                                  | 0.00000                 | 0.00000               | 0.46000               | 0.82530               |
| P2-B2  |                                  | 0.07889                 | 0.08219               | 0.45197               | 1.67710               |
| P2-B3  |                                  | 0.23817                 | 0.05960               | 0.00000               | 0.00000               |
| P2-B4  |                                  | 0.15764                 | 0.10205               | 0.00000               | 0.00000               |
| P2-B5  |                                  | 0.15129                 | 0.09621               | 0.00000               | 0.00000               |
| P2-B6  | <i>Clostridium citroniae</i>     | 3.36551                 | 5.59647               | 13.51704              | 1.48025               |
| P2-B7  |                                  | 0.09889                 | 0.07473               | 0.00000               | 6.70554               |
| P2-B8  |                                  | 0.08234                 | 0.07432               | 0.00000               | 0.00000               |
| P2-B9  |                                  | 0.13331                 | 0.11532               | 0.00000               | 0.00000               |
| P2-C1  |                                  | 0.16696                 | 0.09594               | 0.00000               | 0.00000               |
| P2-C10 |                                  | 0.06820                 | 0.08913               | 0.00000               | 0.41442               |
| P2-C11 |                                  | 0.21407                 | 0.07980               | 0.38246               | 0.00000               |
| P2-C12 |                                  | 0.07224                 | 0.13861               | 0.00000               | 0.00000               |
| P2-C2  |                                  | 0.07709                 | 0.00000               | 0.00000               | 0.00000               |
| P2-C3  |                                  | 0.20313                 | 0.10968               | 0.00000               | 0.00000               |
| P2-C4  |                                  | 0.18868                 | 0.00000               | 0.00000               | 0.00000               |

## Sequence Summary Report

|        |                              |         |         |          |          |
|--------|------------------------------|---------|---------|----------|----------|
| P2-C5  | <i>Clostridium citroniae</i> | 0.99419 | 2.06441 | 2.86249  | 9.24056  |
| P2-C6  |                              | 0.21486 | 0.00000 | 0.00000  | 0.00000  |
| P2-C7  |                              | 0.34449 | 0.21059 | 0.64004  | 0.00000  |
| P2-C8  |                              | 0.11697 | 0.00000 | 0.00000  | 0.00000  |
| P2-C9  |                              | 0.11503 | 0.18023 | 0.00000  | 0.00000  |
| P2-D1  |                              | 0.05209 | 0.00000 | 0.28362  | 0.00000  |
| P2-D10 |                              | 0.19091 | 0.21042 | 0.61587  | 0.00000  |
| P2-D11 |                              | 0.09181 | 0.10310 | 0.00000  | 0.00000  |
| P2-D12 | <i>Phocea massiliensis</i>   | 4.93739 | 0.08653 | 0.19928  | 0.00000  |
| P2-D2  |                              | 0.06144 | 0.10463 | 0.00000  | 0.00000  |
| P2-D3  |                              | 0.25152 | 0.00000 | 0.00000  | 0.00000  |
| P2-D4  |                              | 0.08885 | 0.07625 | 0.00000  | 0.00000  |
| P2-D5  |                              | 0.11977 | 0.10956 | 0.00000  | 0.00000  |
| P2-D6  |                              | 0.09073 | 0.06691 | 0.00000  | 0.00000  |
| P2-D7  |                              | 0.00000 | 0.05867 | 0.00000  | 19.10382 |
| P2-D8  |                              | 0.03079 | 0.00000 | 0.00000  | 0.00000  |
| P2-D9  |                              | 0.07003 | 0.06638 | 0.00000  | 0.00000  |
| P2-E1  |                              | 0.05233 | 0.00000 | 0.24556  | 0.23075  |
| P2-E10 |                              | 0.52698 | 0.00000 | 0.00000  | 0.00000  |
| P2-E11 |                              | 0.17586 | 0.07684 | 0.00000  | 0.00000  |
| P2-E12 |                              | 0.05184 | 0.20163 | 0.00000  | 0.00000  |
| P2-E2  |                              | 0.00000 | 0.09547 | 0.00000  | 0.00000  |
| P2-E3  |                              | 0.04098 | 0.00000 | 0.00000  | 0.00000  |
| P2-E4  |                              | 0.06008 | 0.06777 | 0.00000  | 0.00000  |
| P2-E5  |                              | 0.00000 | 0.11699 | 0.00000  | 0.00000  |
| P2-E6  |                              | 0.00000 | 0.13195 | 0.00000  | 0.00000  |
| P2-E7  |                              | 0.00000 | 0.11782 | 0.00000  | 0.00000  |
| P2-E8  | <i>Clostridium citroniae</i> | 0.00000 | 0.25850 | 38.06156 | 16.32686 |
| P2-E9  | <i>Clostridium symbiosum</i> | 0.11684 | 0.00000 | 1.02610  | 0.00000  |
| P2-F1  |                              | 0.06205 | 0.07664 | 0.20147  | 0.00000  |
| P2-F10 |                              | 0.07216 | 0.00000 | 0.00000  | 3.60249  |
| P2-F11 |                              | 0.08346 | 0.25721 | 0.00000  | 0.00000  |
| P2-F12 |                              | 0.07238 | 0.15120 | 0.00000  | 0.00000  |
| P2-F2  | <i>Lactobacillus rogosae</i> | 0.00000 | 0.00000 | 0.00000  | 61.27788 |
| P2-F3  |                              | 0.05579 | 0.11597 | 0.00000  | 0.55976  |
| P2-F4  |                              | 0.17660 | 0.87449 | 0.55185  | 8.44035  |
| P2-F5  |                              | 0.23013 | 0.13340 | 0.50879  | 15.24047 |

## Sequence Summary Report

|        |                              |         |         |         |          |
|--------|------------------------------|---------|---------|---------|----------|
| P2-F6  |                              | 0.09196 | 0.27258 | 0.56447 | 0.00000  |
| P2-F7  |                              | 0.18298 | 0.07514 | 0.00000 | 0.00000  |
| P2-F8  |                              | 0.06161 | 2.18083 | 0.00000 | 0.00000  |
| P2-F9  |                              | 0.08817 | 0.08383 | 0.00000 | 0.00000  |
| P2-G1  | <i>Lactobacillus rogosae</i> | 0.20420 | 0.14005 | 0.10165 | 54.33423 |
| P2-G10 |                              | 0.20916 | 0.32300 | 0.00000 | 0.00000  |
| P2-G11 |                              | 0.17788 | 0.00000 | 0.40326 | 0.00000  |
| P2-G12 |                              | 0.07224 | 0.12949 | 0.00000 | 0.00000  |
| P2-G2  |                              | 0.14303 | 0.00000 | 0.52918 | 0.26432  |
| P2-G3  |                              | 0.22225 | 0.06524 | 0.20311 | 11.54807 |
| P2-G4  |                              | 0.08906 | 0.08379 | 0.34502 | 6.42764  |
| P2-G5  |                              | 0.11325 | 0.23689 | 0.00000 | 0.00000  |
| P2-G6  |                              | 0.26286 | 0.10425 | 0.00000 | 0.00000  |
| P2-G7  |                              | 0.78107 | 0.27826 | 0.00000 | 0.87031  |
| P2-G8  |                              | 0.49365 | 0.00000 | 0.00000 | 0.00000  |
| P2-G9  |                              | 0.12059 | 0.00000 | 0.00000 | 0.00000  |
| P2-H1  |                              | 0.00000 | 0.09745 | 0.07264 | 9.19698  |
| P2-H10 |                              | 0.13659 | 0.26695 | 0.00000 | 0.00000  |
| P2-H11 |                              | 0.07915 | 0.00000 | 0.00000 | 0.00000  |
| P2-H12 |                              | 0.30870 | 0.00000 | 0.09035 | 0.00000  |
| P2-H2  | <i>Roseburia faecis</i>      | 0.00000 | 0.24335 | 1.12360 | 0.00000  |
| P2-H3  |                              | 0.00000 | 0.00000 | 0.20900 | 0.31638  |
| P2-H4  |                              | 0.25369 | 0.08703 | 0.00000 | 0.00000  |
| P2-H5  |                              | 0.08617 | 0.10684 | 0.00000 | 0.00000  |
| P2-H6  |                              | 0.00000 | 0.18526 | 0.00000 | 0.00000  |
| P2-H7  |                              | 0.11217 | 0.00000 | 0.00000 | 0.00000  |
| P2-H8  |                              | 0.00000 | 0.07500 | 0.00000 | 0.00000  |
| P2-H9  |                              | 0.07229 | 0.12166 | 0.11989 | 0.00000  |

## Sequence Summary Report

|        |                         | LCA as substrate        |                       | 3-OxoLCA as substrate |                       |
|--------|-------------------------|-------------------------|-----------------------|-----------------------|-----------------------|
| Plate3 | 16S rDNA sequencing     | 3-OxoLCA production (%) | isoLCA production (%) | LCA production (%)    | isoLCA production (%) |
| P3-A1  |                         | 0.04669                 | 0.04038               | 0.00000               | 0.00000               |
| P3-A10 |                         | 0.19176                 | 0.28934               | 0.59043               | 0.00000               |
| P3-A11 |                         | 0.09648                 | 0.10672               | 0.00000               | 0.00000               |
| P3-A12 |                         | 0.03841                 | 0.06944               | 0.00000               | 0.00000               |
| P3-A2  |                         | 0.08071                 | 0.06476               | 0.00000               | 0.00000               |
| P3-A3  |                         | 0.00000                 | 0.05054               | 0.00000               | 0.00000               |
| P3-A4  |                         | 0.00000                 | 0.04563               | 0.02744               | 0.00000               |
| P3-A5  |                         | 0.00000                 | 0.00000               | 0.00000               | 0.00000               |
| P3-A6  |                         | 0.11399                 | 0.05170               | 0.00000               | 0.00000               |
| P3-A7  |                         | 0.02592                 | 0.00000               | 0.00000               | 0.00000               |
| P3-A8  |                         | 0.01965                 | 0.02871               | 0.00000               | 0.00000               |
| P3-A9  |                         | 0.09683                 | 0.00000               | 0.00000               | 0.00000               |
| P3-B1  |                         | 0.09850                 | 0.07424               | 0.00000               | 0.00000               |
| P3-B10 |                         | 0.09136                 | 0.00000               | 0.00000               | 0.00000               |
| P3-B11 |                         | 0.02729                 | 0.03438               | 0.00000               | 0.00000               |
| P3-B12 |                         | 0.09084                 | 0.06265               | 0.00000               | 0.00000               |
| P3-B2  |                         | 0.02591                 | 0.13213               | 0.00000               | 0.00000               |
| P3-B3  |                         | 0.05501                 | 0.00000               | 0.00000               | 0.00000               |
| P3-B4  |                         | 0.03076                 | 0.03734               | 0.00000               | 0.00000               |
| P3-B5  |                         | 0.02277                 | 0.00000               | 0.00000               | 0.00000               |
| P3-B6  |                         | 0.05139                 | 0.00000               | 0.02944               | 0.00000               |
| P3-B7  |                         | 0.04378                 | 0.05759               | 0.00000               | 0.00000               |
| P3-B8  |                         | 0.00000                 | 0.10633               | 0.00000               | 0.00000               |
| P3-B9  |                         | 0.02763                 | 0.00000               | 0.00000               | 0.00000               |
| P3-C1  | Clostridium perfringens | 5.57412                 | 0.00000               | 24.02252              | 0.00000               |
| P3-C10 | Clostridium perfringens | 0.71723                 | 0.11029               | 14.57273              | 0.00000               |
| P3-C11 | Clostridium perfringens | 1.63981                 | 0.07242               | 49.21909              | 0.00000               |
| P3-C12 |                         | 0.11244                 | 0.16934               | 0.02252               | 0.00000               |
| P3-C2  | Clostridium perfringens | 0.73451                 | 0.00000               | 89.24200              | 0.00000               |
| P3-C3  | Clostridium perfringens | 1.07343                 | 0.04509               | 99.95836              | 0.00000               |
| P3-C4  | Clostridium perfringens | 0.53319                 | 0.03920               | 75.70073              | 0.00000               |

## Sequence Summary Report

|        |                         |         |         |           |         |
|--------|-------------------------|---------|---------|-----------|---------|
| P3-C5  | Clostridium perfringens | 0.41412 | 0.06213 | 100.00000 | 0.00000 |
| P3-C6  | Clostridium perfringens | 0.77330 | 0.06612 | 95.72283  | 0.00000 |
| P3-C7  | Clostridium perfringens | 0.24067 | 0.05611 | 97.00607  | 0.00000 |
| P3-C8  |                         | 0.13672 | 0.00000 | 0.03182   | 0.00000 |
| P3-C9  | Clostridium perfringens | 0.05478 | 0.00000 | 73.88949  | 0.00000 |
| P3-D1  |                         | 0.96008 | 0.03758 | 0.78782   | 0.00000 |
| P3-D10 | Clostridium perfringens | 0.32439 | 0.00000 | 72.36535  | 0.00000 |
| P3-D11 | Clostridium perfringens | 0.48075 | 0.07814 | 98.89026  | 0.00000 |
| P3-D12 | Clostridium perfringens | 2.17388 | 0.14828 | 38.81224  | 0.00000 |
| P3-D2  |                         | 0.07424 | 0.07785 | 0.16122   | 0.00000 |
| P3-D3  | Clostridium perfringens | 0.76857 | 0.10536 | 100.00000 | 0.00000 |
| P3-D4  | Clostridium perfringens | 1.15756 | 0.07215 | 99.25482  | 0.00000 |
| P3-D5  | Clostridium perfringens | 1.62943 | 0.08049 | 45.94084  | 0.00000 |
| P3-D6  | Clostridium perfringens | 1.04895 | 0.05123 | 87.27977  | 0.00000 |
| P3-D7  | Clostridium perfringens | 0.07881 | 0.03989 | 29.77756  | 0.00000 |
| P3-D8  | Clostridium perfringens | 0.95645 | 0.05630 | 49.13060  | 0.00000 |
| P3-D9  | Clostridium perfringens | 0.69771 | 0.09575 | 45.30661  | 0.00000 |
| P3-E1  | Clostridium perfringens | 6.35653 | 0.06872 | 95.91740  | 0.00000 |
| P3-E10 | Clostridium perfringens | 0.11336 | 0.15894 | 46.89499  | 0.00000 |
| P3-E11 | Clostridium perfringens | 0.85345 | 0.07484 | 94.27890  | 0.00000 |
| P3-E12 | Clostridium perfringens | 0.12876 | 0.11144 | 77.43442  | 0.00000 |
| P3-E2  | Clostridium perfringens | 5.96444 | 0.10204 | 1.50844   | 0.00000 |
| P3-E3  | Clostridium perfringens | 0.23619 | 0.04408 | 90.97546  | 0.00000 |
| P3-E4  | Clostridium perfringens | 0.66690 | 0.08194 | 1.20138   | 0.00000 |
| P3-E5  | Clostridium perfringens | 0.68799 | 0.05956 | 20.97578  | 0.00000 |
| P3-E6  | Clostridium perfringens | 0.79123 | 0.00000 | 47.18241  | 0.00000 |
| P3-E7  | Clostridium perfringens | 0.61406 | 0.04279 | 16.54851  | 0.00000 |
| P3-E8  | Clostridium perfringens | 0.20598 | 0.04937 | 99.63419  | 0.00000 |
| P3-E9  | Clostridium perfringens | 1.50024 | 0.04180 | 15.39342  | 0.00000 |
| P3-F1  | Clostridium perfringens | 0.79554 | 0.04375 | 41.33744  | 0.00000 |
| P3-F10 |                         | 0.39814 | 0.00000 | 0.37659   | 0.00000 |
| P3-F11 | Clostridium perfringens | 1.94334 | 0.03782 | 74.48873  | 0.00000 |
| P3-F12 | Clostridium perfringens | 0.12627 | 0.12733 | 51.94301  | 0.00000 |
| P3-F2  |                         | 0.94855 | 0.13978 | 0.03661   | 0.00000 |
| P3-F3  | Clostridium perfringens | 0.29007 | 0.00000 | 82.98616  | 0.00000 |
| P3-F4  | Clostridium perfringens | 0.10861 | 0.15433 | 4.76170   | 0.00000 |
| P3-F5  | Clostridium perfringens | 0.23673 | 0.03057 | 98.11292  | 0.00000 |

## Sequence Summary Report

|        |                         |         |          |           |          |
|--------|-------------------------|---------|----------|-----------|----------|
| P3-F6  | Clostridium perfringens | 1.08508 | 0.71104  | 4.88340   | 0.00000  |
| P3-F7  | Clostridium perfringens | 0.01983 | 25.57211 | 2.60407   | 97.39593 |
| P3-F8  | Ruminococcus gnavus     | 0.18143 | 27.10880 | 52.49258  | 46.14957 |
| P3-F9  | Clostridium perfringens | 0.38468 | 0.00000  | 98.81418  | 0.00000  |
| P3-G1  | Clostridium perfringens | 0.23529 | 0.03248  | 22.90683  | 0.00000  |
| P3-G10 | Clostridium perfringens | 1.14055 | 0.05183  | 97.08495  | 0.00000  |
| P3-G11 | Clostridium perfringens | 0.33132 | 27.73381 | 0.78034   | 98.35997 |
| P3-G12 |                         | 0.04911 | 0.06980  | 0.18124   | 0.29218  |
| P3-G2  | Ruminococcus gnavus     | 0.24153 | 22.18868 | 48.42299  | 43.77997 |
| P3-G3  | Clostridium perfringens | 0.58240 | 0.00000  | 32.75538  | 0.00000  |
| P3-G4  | Clostridium perfringens | 0.61205 | 0.06516  | 36.90437  | 0.00000  |
| P3-G5  | Clostridium perfringens | 0.53059 | 0.05577  | 43.83541  | 0.00000  |
| P3-G6  | Clostridium perfringens | 0.04822 | 0.11764  | 98.49617  | 0.00000  |
| P3-G7  | Clostridium perfringens | 0.03987 | 0.08650  | 100.00000 | 0.00000  |
| P3-G8  | Clostridium perfringens | 0.74578 | 0.05977  | 67.48157  | 0.00000  |
| P3-G9  | Clostridium perfringens | 1.08321 | 0.07836  | 99.88428  | 0.00000  |
| P3-H1  | Clostridium perfringens | 0.30252 | 0.08074  | 20.71473  | 0.00000  |
| P3-H10 |                         | 0.06888 | 0.06570  | 0.02478   | 0.00000  |
| P3-H11 |                         | 0.10529 | 0.00000  | 0.00000   | 0.00000  |
| P3-H12 |                         | 0.04466 | 0.06503  | 0.00000   | 0.00000  |
| P3-H2  | Clostridium perfringens | 0.83888 | 0.04650  | 99.51622  | 0.00000  |
| P3-H3  | Clostridium perfringens | 0.09169 | 0.00000  | 10.12035  | 0.00000  |
| P3-H4  | Clostridium perfringens | 0.65165 | 0.03291  | 100.00000 | 0.00000  |
| P3-H5  | Clostridium perfringens | 0.81587 | 0.46591  | 98.96462  | 0.00000  |
| P3-H6  | Clostridium perfringens | 1.81324 | 0.04175  | 25.68884  | 0.00000  |
| P3-H7  | Clostridium perfringens | 0.08223 | 0.00000  | 13.78581  | 0.00000  |
| P3-H8  | Clostridium perfringens | 0.87914 | 0.20223  | 99.77441  | 0.00000  |
| P3-H9  |                         | 0.05896 | 0.00000  | 0.00000   | 0.00000  |



## Sequence Summary Report

| Plate4 | 16S rDNA sequencing   | LCA as substrate        |                       | 3-OxoLCA as substrate |                       |
|--------|-----------------------|-------------------------|-----------------------|-----------------------|-----------------------|
|        |                       | 3-OxoLCA production (%) | isoLCA production (%) | LCA production (%)    | isoLCA production (%) |
| P4-A1  | Roseburia faecis      | 0.04131                 | 0.06218               | 10.64598              | 2.68225               |
| P4-A10 |                       | 0.00000                 | 0.00000               | 0.22471               | 0.11792               |
| P4-A11 |                       | 0.00000                 | 0.06980               | 0.52897               | 0.00000               |
| P4-A12 |                       | 0.13686                 | 0.00000               | 0.00000               | 0.00000               |
| P4-A2  |                       | 0.02931                 | 0.00000               | 0.00000               | 0.00000               |
| P4-A3  |                       | 0.00000                 | 0.08458               | 0.00000               | 0.00000               |
| P4-A4  |                       | 0.00000                 | 0.09108               | 0.00000               | 0.07221               |
| P4-A5  |                       | 0.00000                 | 0.05421               | 0.00000               | 0.00000               |
| P4-A6  |                       | 0.03343                 | 0.00000               | 0.00000               | 0.00000               |
| P4-A7  | Bacillus coagulans    | 0.00000                 | 0.00000               | 0.17659               | 53.55268              |
| P4-A8  | Bacillus coagulans    | 0.09968                 | 0.00000               | 0.21065               | 64.15554              |
| P4-A9  | Roseburia faecis      | 0.02208                 | 0.00000               | 88.76916              | 5.42824               |
| P4-B1  | Clostridium aldenense | 0.24958                 | 0.00000               | 3.37946               | 16.66502              |
| P4-B10 | Phocaea massiliensis  | 1.32086                 | 0.07467               | 86.42320              | 3.39077               |
| P4-B11 |                       | 0.00000                 | 0.00000               | 0.00000               | 0.00000               |
| P4-B12 |                       | 0.09366                 | 0.00000               | 0.00000               | 0.00000               |
| P4-B2  | Clostridium aldenense | 2.17636                 | 0.76229               | 34.88247              | 61.22177              |
| P4-B3  |                       | 0.02809                 | 0.05109               | 0.00000               | 0.08333               |
| P4-B4  |                       | 0.00000                 | 0.10525               | 0.00000               | 0.00000               |
| P4-B5  |                       | 0.00000                 | 0.00000               | 0.00000               | 0.00000               |
| P4-B6  |                       | 0.00000                 | 0.00000               | 0.00000               | 0.00000               |
| P4-B7  |                       | 0.00000                 | 0.09794               | 0.00000               | 0.00000               |
| P4-B8  |                       | 0.10434                 | 0.08155               | 0.32707               | 0.00000               |
| P4-B9  |                       | 0.11091                 | 0.00000               | 0.20501               | 0.00000               |
| P4-C1  |                       | 0.63381                 | 0.00000               | 0.00000               | 0.00000               |
| P4-C10 | Clostridium citroniae | 0.07761                 | 0.00000               | 88.42194              | 4.94213               |
| P4-C11 |                       | 0.08862                 | 0.00000               | 0.54059               | 0.53067               |
| P4-C12 | Bacteroides fragilis  | 0.00000                 | 0.00000               | 86.85391              | 0.21107               |
| P4-C2  |                       | 0.05000                 | 0.00000               | 0.18937               | 5.52353               |
| P4-C3  |                       | 0.00000                 | 0.07861               | 0.00000               | 0.00000               |
| P4-C4  |                       | 0.04253                 | 0.00000               | 0.00000               | 0.00000               |

## Sequence Summary Report

|        |                                        |          |         |          |          |
|--------|----------------------------------------|----------|---------|----------|----------|
| P4-C5  |                                        | 0.00000  | 0.08674 | 0.00000  | 0.00000  |
| P4-C6  |                                        | 0.00000  | 0.07933 | 0.00000  | 0.00000  |
| P4-C7  |                                        | 0.13754  | 0.00000 | 0.00000  | 0.00000  |
| P4-C8  |                                        | 0.03823  | 0.00000 | 0.00000  | 0.00000  |
| P4-C9  |                                        | 0.34134  | 0.08930 | 0.61111  | 0.56821  |
| P4-D1  | <i>Fusicatenibacter saccharivorans</i> | 0.03713  | 0.05281 | 96.15253 | 3.51286  |
| P4-D10 |                                        | 0.05479  | 0.00000 | 0.00000  | 0.00000  |
| P4-D11 |                                        | 0.00000  | 0.00000 | 0.00000  | 0.00000  |
| P4-D12 |                                        | 0.05575  | 0.03772 | 0.00000  | 0.00000  |
| P4-D2  |                                        | 0.00000  | 0.09721 | 0.00000  | 0.00000  |
| P4-D3  |                                        | 0.00000  | 0.10769 | 0.00000  | 0.00000  |
| P4-D4  |                                        | 0.00000  | 0.17380 | 0.00000  | 0.00000  |
| P4-D5  |                                        | 0.00000  | 0.00000 | 0.00000  | 0.00000  |
| P4-D6  | <i>Clostridium aldenense</i>           | 0.66174  | 0.10490 | 18.28490 | 4.51408  |
| P4-D7  |                                        | 0.21615  | 0.00000 | 0.00000  | 0.00000  |
| P4-D8  |                                        | 0.00000  | 0.06668 | 0.00000  | 0.00000  |
| P4-D9  |                                        | 0.00000  | 0.18756 | 0.00000  | 0.00000  |
| P4-E1  |                                        | 0.03683  | 0.00000 | 0.00000  | 0.00000  |
| P4-E10 |                                        | 0.36658  | 0.00000 | 0.00000  | 0.00000  |
| P4-E11 |                                        | 0.10058  | 0.08605 | 0.00000  | 0.00000  |
| P4-E12 |                                        | 0.08287  | 0.25604 | 0.00000  | 0.00000  |
| P4-E2  | <i>Romboutsia lituseburensis</i>       | 0.00000  | 0.06973 | 11.68166 | 13.29531 |
| P4-E3  |                                        | 0.11122  | 0.00000 | 0.00000  | 0.00000  |
| P4-E4  | <i>Romboutsia timonensis</i>           | 0.09589  | 0.11567 | 10.78270 | 1.10043  |
| P4-E5  | <i>Bacteroides fragilis</i>            | 0.00000  | 0.07495 | 7.24833  | 1.54549  |
| P4-E6  |                                        | 0.08421  | 0.08216 | 0.00000  | 0.00000  |
| P4-E7  |                                        | 0.00000  | 0.00000 | 0.00000  | 0.00000  |
| P4-E8  |                                        | 0.00000  | 0.07612 | 0.00000  | 0.00000  |
| P4-E9  |                                        | 0.12054  | 0.00000 | 0.00000  | 0.00000  |
| P4-F1  |                                        | 0.44095  | 0.57193 | 0.00000  | 0.00000  |
| P4-F10 | <i>Clostridium perfringens</i>         | 21.62110 | 0.03675 | 93.58619 | 0.49505  |
| P4-F11 | <i>Clostridium perfringens</i>         | 15.86673 | 0.07946 | 81.61440 | 0.32529  |
| P4-F12 | <i>Clostridium perfringens</i>         | 6.26080  | 0.24302 | 82.76126 | 0.47362  |
| P4-F2  |                                        | 0.00000  | 0.00000 | 0.00000  | 0.00000  |
| P4-F3  |                                        | 0.00000  | 0.00000 | 0.03490  | 0.00000  |
| P4-F4  |                                        | 0.00000  | 0.00000 | 0.00000  | 0.00000  |
| P4-F5  |                                        | 0.00000  | 0.06903 | 0.00000  | 0.00000  |

## Sequence Summary Report

|        |                                   |          |          |          |          |
|--------|-----------------------------------|----------|----------|----------|----------|
| P4-F6  | <i>Clostridium perfringens</i>    | 2.43789  | 0.07638  | 96.35296 | 0.00000  |
| P4-F7  | <i>Clostridium perfringens</i>    | 1.31019  | 0.00000  | 92.41206 | 0.24208  |
| P4-F8  | <i>Clostridium aldenense</i>      | 2.70961  | 0.44668  | 32.66861 | 6.71354  |
| P4-F9  | <i>Clostridium perfringens</i>    | 0.10195  | 0.04457  | 9.85060  | 0.18221  |
| P4-G1  | <i>Clostridium perfringens</i>    | 3.06696  | 0.00000  | 83.72991 | 0.24167  |
| P4-G10 | <i>Clostridium perfringens</i>    | 2.76120  | 0.00000  | 90.75036 | 0.15843  |
| P4-G11 | <i>Clostridium perfringens</i>    | 16.70926 | 0.05442  | 88.09501 | 0.45870  |
| P4-G12 | <i>Clostridium perfringens</i>    | 38.33151 | 0.19432  | 88.81575 | 0.46315  |
| P4-G2  | <i>Ruminococcus gnavus</i>        | 0.68704  | 19.13871 | 73.00227 | 23.67676 |
| P4-G3  | <i>Clostridium perfringens</i>    | 34.02939 | 0.04036  | 86.32963 | 1.08307  |
| P4-G4  | <i>Clostridium perfringens</i>    | 29.73023 | 0.00000  | 90.96978 | 0.56736  |
| P4-G5  | <i>Clostridium perfringens</i>    | 33.17728 | 0.00000  | 91.14764 | 0.40673  |
| P4-G6  | <i>Clostridium perfringens</i>    | 26.80538 | 0.00000  | 89.99235 | 0.15519  |
| P4-G7  | <i>Clostridium perfringens</i>    | 20.99210 | 0.00000  | 90.88960 | 0.37955  |
| P4-G8  | <i>Clostridium perfringens</i>    | 12.21771 | 0.00000  | 97.80056 | 0.00000  |
| P4-G9  | <i>Clostridium perfringens</i>    | 21.50584 | 0.02950  | 96.73967 | 0.34898  |
| P4-H1  | <i>Clostridium perfringens</i>    | 34.20743 | 0.00000  | 84.64784 | 0.41899  |
| P4-H10 | <i>Clostridium perfringens</i>    | 2.29594  | 0.00000  | 93.13971 | 0.60197  |
| P4-H11 | <i>Clostridium perfringens</i>    | 3.34450  | 0.10198  | 87.11719 | 0.15687  |
| P4-H12 | <i>Clostridium perfringens</i>    | 22.41180 | 0.00000  | 93.25305 | 0.34212  |
| P4-H2  | <i>Clostridium perfringens</i>    | 1.68172  | 0.16722  | 89.76903 | 0.15412  |
| P4-H3  | <i>Clostridium perfringens</i>    | 2.44717  | 0.00000  | 87.56843 | 0.16944  |
| P4-H4  | <i>Clostridium perfringens</i>    | 1.72430  | 0.10102  | 88.99064 | 0.12301  |
| P4-H5  | <i>Clostridium perfringens</i>    | 2.00302  | 0.04339  | 96.00979 | 0.26234  |
| P4-H6  | <i>Clostridium perfringens</i>    | 24.30641 | 0.02946  | 88.94044 | 0.47597  |
| P4-H7  | <i>Clostridium perfringens</i>    | 28.92956 | 0.04700  | 92.33367 | 6.61562  |
| P4-H8  | <i>Coprobacillus cateniformis</i> | 0.25859  | 0.00000  | 99.13505 | 0.00000  |
| P4-H9  | <i>Clostridium perfringens</i>    | 1.64309  | 0.24424  | 88.99835 | 0.17231  |

## Sequence Summary Report

| Plate5 | 16S rDNA sequencing                 | LCA as substrate        |                       | 3-OxoLCA as substrate |                       |
|--------|-------------------------------------|-------------------------|-----------------------|-----------------------|-----------------------|
|        |                                     | 3-OxoLCA production (%) | isoLCA production (%) | LCA production (%)    | isoLCA production (%) |
| P5-A1  | <i>Collinsella aerofaciens</i>      | 6.35832                 | 0.17785               | 100.00000             | 0.00000               |
| P5-A10 | <i>Collinsella aerofaciens</i>      | 0.00000                 | 0.00000               | 7.83984               | 0.48520               |
| P5-A11 |                                     | 0.00000                 | 0.13360               | 0.05129               | 0.00000               |
| P5-A12 | <i>Bacteroides cellulosilyticus</i> | 0.00000                 | 0.24641               | 12.08809              | 40.28507              |
| P5-A2  | <i>Bifidobacterium longum</i>       | 0.16383                 | 1.34041               | 0.02586               | 1.99457               |
| P5-A3  | <i>Collinsella aerofaciens</i>      | 4.48771                 | 0.00000               | 99.43387              | 0.00000               |
| P5-A4  |                                     | 0.00000                 | 0.27769               | 0.00000               | 47.46135              |
| P5-A5  | <i>Peptoniphilus harei</i>          | 0.00000                 | 0.00000               | 1.91468               | 82.43851              |
| P5-A6  |                                     | 0.00000                 | 0.00000               | 0.00000               | 24.12213              |
| P5-A7  |                                     | 0.10067                 | 0.33789               | 0.31795               | 2.08422               |
| P5-A8  |                                     | 0.50229                 | 0.26525               | 0.60464               | 1.85514               |
| P5-A9  | <i>Collinsella aerofaciens</i>      | 3.29954                 | 0.46866               | 93.94722              | 0.00000               |
| P5-B1  |                                     | 0.00000                 | 0.00000               | 0.00000               | 0.00000               |
| P5-B10 | <i>Collinsella aerofaciens</i>      | 0.51554                 | 0.61793               | 99.75056              | 0.13289               |
| P5-B11 |                                     | 0.00000                 | 0.51917               | 0.00000               | 0.00000               |
| P5-B12 | <i>Bacteroides cellulosilyticus</i> | 0.00000                 | 0.00000               | 11.27135              | 0.71933               |
| P5-B2  |                                     | 0.00000                 | 0.73827               | 0.00000               | 0.00000               |
| P5-B3  | <i>Collinsella aerofaciens</i>      | 0.00000                 | 0.93371               | 7.44576               | 0.55707               |
| P5-B4  |                                     | 0.12778                 | 0.86557               | 0.00000               | 0.00000               |
| P5-B5  |                                     | 0.00000                 | 0.00000               | 0.00000               | 0.00000               |
| P5-B6  | <i>Collinsella aerofaciens</i>      | 0.00000                 | 0.37197               | 1.76918               | 93.87159              |
| P5-B7  | <i>Collinsella aerofaciens</i>      | 0.21324                 | 0.00000               | 99.94257              | 0.00000               |
| P5-B8  |                                     | 0.00000                 | 0.00000               | 0.00000               | 0.06868               |
| P5-B9  | <i>Bifidobacterium longum</i>       | 1.47636                 | 2.29794               | 2.36788               | 7.56313               |
| P5-C1  | <i>Collinsella aerofaciens</i>      | 4.16783                 | 0.00000               | 47.03655              | 0.00000               |
| P5-C10 |                                     | 0.00000                 | 0.41384               | 0.00000               | 0.10701               |
| P5-C11 | <i>Bifidobacterium longum</i>       | 0.75415                 | 2.16399               | 0.09530               | 3.46336               |
| P5-C12 |                                     | 0.00000                 | 0.00000               | 0.00000               | 0.00000               |
| P5-C2  | <i>Collinsella aerofaciens</i>      | 0.29273                 | 6.13747               | 89.01105              | 8.91820               |
| P5-C3  |                                     | 0.00000                 | 0.00000               | 0.03648               | 10.35777              |
| P5-C4  | <i>Bifidobacterium longum</i>       | 1.45408                 | 2.12153               | 0.04816               | 4.52518               |

## Sequence Summary Report

|        |                                          |         |          |           |          |
|--------|------------------------------------------|---------|----------|-----------|----------|
| P5-C5  | <i>Collinsella aerofaciens</i>           | 0.00000 | 0.00000  | 10.42374  | 0.62101  |
| P5-C6  |                                          | 0.00000 | 0.15480  | 0.00000   | 0.00000  |
| P5-C7  | <i>Collinsella aerofaciens</i>           | 0.00000 | 0.00000  | 9.41029   | 0.72405  |
| P5-C8  |                                          | 0.00000 | 0.00000  | 0.01172   | 0.00000  |
| P5-C9  |                                          | 0.00000 | 0.67108  | 0.00000   | 0.00000  |
| P5-D1  | <i>Collinsella aerofaciens</i>           | 0.00000 | 0.28006  | 14.56738  | 1.56613  |
| P5-D10 |                                          | 1.59360 | 12.22718 | 0.04800   | 0.00000  |
| P5-D11 | <i>Collinsella aerofaciens</i>           | 0.70233 | 0.00000  | 99.32288  | 0.00000  |
| P5-D12 |                                          | 0.52481 | 0.18082  | 0.24355   | 4.30147  |
| P5-D2  |                                          | 0.00000 | 0.00000  | 0.00000   | 2.28786  |
| P5-D3  |                                          | 0.09161 | 0.28118  | 0.00000   | 0.28634  |
| P5-D4  |                                          | 0.07542 | 0.28662  | 0.00000   | 0.00000  |
| P5-D5  | <i>Collinsella aerofaciens</i>           | 0.82951 | 0.00000  | 99.39542  | 0.00000  |
| P5-D6  |                                          | 0.00000 | 0.00000  | 0.00000   | 0.00000  |
| P5-D7  |                                          | 0.00000 | 0.30827  | 0.05379   | 0.72024  |
| P5-D8  |                                          | 0.00000 | 0.30035  | 0.06145   | 7.37611  |
| P5-D9  | <i>Collinsella aerofaciens</i>           | 0.00000 | 0.00000  | 5.78695   | 1.77300  |
| P5-E1  | <i>Bacteroides dorei</i>                 | 0.00000 | 0.00000  | 1.79280   | 0.98924  |
| P5-E10 |                                          | 0.00000 | 0.00000  | 0.00000   | 0.10101  |
| P5-E11 | <i>Bacteroides cellulosilyticus</i>      | 0.00000 | 0.00000  | 96.62218  | 0.83395  |
| P5-E12 | <i>Bifidobacterium pseudocatenulatum</i> | 0.00000 | 0.32475  | 12.02219  | 64.21384 |
| P5-E2  |                                          | 1.61618 | 0.65487  | 0.13583   | 10.44787 |
| P5-E3  | <i>Bifidobacterium longum</i>            | 1.45199 | 2.02448  | 2.74125   | 5.82997  |
| P5-E4  |                                          | 0.00000 | 0.52835  | 0.22599   | 18.22831 |
| P5-E5  | <i>Bifidobacterium longum</i>            | 0.08819 | 2.09533  | 3.56424   | 0.47473  |
| P5-E6  | <i>Bifidobacterium longum</i>            | 1.27046 | 2.26067  | 25.94907  | 72.32475 |
| P5-E7  |                                          | 0.09179 | 0.44059  | 0.05398   | 0.48957  |
| P5-E8  | <i>Collinsella aerofaciens</i>           | 0.64140 | 0.60553  | 99.96220  | 0.00000  |
| P5-E9  | <i>Collinsella aerofaciens</i>           | 0.00000 | 0.55511  | 11.92025  | 0.81696  |
| P5-F1  |                                          | 0.10068 | 0.00000  | 0.00000   | 1.54274  |
| P5-F10 |                                          | 0.00000 | 0.00000  | 0.00000   | 3.91072  |
| P5-F11 |                                          | 0.00000 | 0.00000  | 0.02656   | 6.92200  |
| P5-F12 | <i>Bifidobacterium longum</i>            | 0.09506 | 2.23312  | 1.80464   | 95.41979 |
| P5-F2  | <i>Collinsella aerofaciens</i>           | 1.22242 | 0.00000  | 100.00000 | 0.00000  |
| P5-F3  | <i>Bifidobacterium longum</i>            | 0.20974 | 1.02181  | 0.03011   | 2.32614  |
| P5-F4  |                                          | 0.00000 | 0.25372  | 0.00000   | 0.00000  |
| P5-F5  | <i>Bifidobacterium faecale</i>           | 0.00000 | 0.22998  | 1.14343   | 0.00000  |

## Sequence Summary Report

|        |                                          |          |         |           |          |
|--------|------------------------------------------|----------|---------|-----------|----------|
| P5-F6  | <i>Collinsella aerofaciens</i>           | 0.00000  | 0.00000 | 6.84434   | 70.72986 |
| P5-F7  | <i>Collinsella aerofaciens</i>           | 0.28076  | 0.56239 | 100.00000 | 0.00000  |
| P5-F8  |                                          | 0.00000  | 0.00000 | 0.09846   | 0.40862  |
| P5-F9  |                                          | 0.00000  | 0.34488 | 0.00000   | 0.00000  |
| P5-G1  | <i>Bacteroides cellulosilyticus</i>      | 1.68478  | 0.00000 | 97.84053  | 0.00000  |
| P5-G10 | <i>Collinsella aerofaciens</i>           | 0.35874  | 0.00000 | 2.64588   | 0.00000  |
| P5-G11 | <i>Bacteroides cellulosilyticus</i>      | 0.00000  | 0.00000 | 0.36476   | 95.67585 |
| P5-G12 | <i>Bifidobacterium faecale</i>           | 0.00000  | 0.00000 | 19.20505  | 0.00000  |
| P5-G2  | <i>Collinsella aerofaciens</i>           | 0.23720  | 0.00000 | 99.87347  | 0.00000  |
| P5-G3  | <i>Bifidobacterium longum</i>            | 1.80020  | 2.33632 | 0.04824   | 5.57488  |
| P5-G4  | <i>Collinsella aerofaciens</i>           | 0.31259  | 0.00000 | 99.92285  | 0.05581  |
| P5-G5  | <i>Collinsella aerofaciens</i>           | 0.23247  | 0.81635 | 24.24741  | 0.00000  |
| P5-G6  | <i>Bifidobacterium longum</i>            | 1.51745  | 0.77337 | 26.56201  | 71.91720 |
| P5-G7  | <i>Bifidobacterium longum</i>            | 0.14271  | 2.01638 | 3.64790   | 5.26859  |
| P5-G8  |                                          | 0.00000  | 0.20980 | 0.10540   | 86.94181 |
| P5-G9  |                                          | 0.00000  | 0.00000 | 0.00000   | 0.72537  |
| P5-H1  |                                          | 0.00000  | 0.00000 | 0.00000   | 19.76039 |
| P5-H10 |                                          | 0.00000  | 0.21221 | 0.00000   | 0.00000  |
| P5-H11 | <i>Bacteroides fragilis</i>              | 2.75009  | 0.00000 | 3.83345   | 0.00000  |
| P5-H12 | <i>Bacteroides fragilis</i>              | 31.03629 | 0.00000 | 98.30083  | 0.00000  |
| P5-H2  |                                          | 0.00000  | 0.12643 | 0.00000   | 99.39552 |
| P5-H3  |                                          | 0.00000  | 0.64587 | 0.05376   | 0.00000  |
| P5-H4  |                                          | 0.00000  | 0.27373 | 0.00000   | 0.00000  |
| P5-H5  |                                          | 0.00000  | 0.29779 | 0.00000   | 0.10413  |
| P5-H6  | <i>Collinsella intestinalis</i>          | 4.58706  | 0.67423 | 96.97683  | 0.00000  |
| P5-H7  |                                          | 0.00000  | 0.27028 | 0.00000   | 0.00000  |
| P5-H8  | <i>Bifidobacterium pseudocatenulatum</i> | 0.00000  | 0.18864 | 0.00000   | 70.84122 |
| P5-H9  | <i>Bacteroides fragilis</i>              | 0.00000  | 0.00000 | 0.36897   | 14.99881 |

## Sequence Summary Report

| Plate6 | 16S rDNA sequencing             | LCA as substrate        |                       | 3-OxoLCA as substrate |                       |
|--------|---------------------------------|-------------------------|-----------------------|-----------------------|-----------------------|
|        |                                 | 3-OxoLCA production (%) | isoLCA production (%) | LCA production (%)    | isoLCA production (%) |
| P6-A1  |                                 | 0.04739                 | 0.00000               | 0.00000               | 0.00000               |
| P6-A10 | <i>Collinsella intestinalis</i> | 5.03699                 | 0.05249               | 80.87789              | 0.20138               |
| P6-A11 | <i>Collinsella intestinalis</i> | 2.18681                 | 0.05554               | 80.95377              | 0.23985               |
| P6-A12 | <i>Collinsella intestinalis</i> | 0.78213                 | 0.00000               | 88.92832              | 0.16588               |
| P6-A2  | <i>Collinsella intestinalis</i> | 0.79731                 | 0.03464               | 82.57390              | 0.15288               |
| P6-A3  | <i>Peptoniphilus harei</i>      | 0.00000                 | 0.03797               | 4.83845               | 83.78978              |
| P6-A4  |                                 | 0.00000                 | 0.03637               | 0.06501               | 0.00000               |
| P6-A5  | <i>Collinsella aerofaciens</i>  | 0.09483                 | 0.05829               | 80.81056              | 0.00000               |
| P6-A6  |                                 | 0.00000                 | 0.09777               | 0.03097               | 0.00000               |
| P6-A7  | <i>Collinsella intestinalis</i> | 0.05779                 | 0.09028               | 85.02009              | 0.14596               |
| P6-A8  | <i>Collinsella intestinalis</i> | 1.13690                 | 0.00000               | 85.78117              | 0.00000               |
| P6-A9  | <i>Peptoniphilus harei</i>      | 0.00000                 | 0.00000               | 5.44749               | 77.61245              |
| P6-B1  | <i>Collinsella intestinalis</i> | 0.73471                 | 0.61133               | 85.10960              | 0.08380               |
| P6-B10 | <i>Collinsella intestinalis</i> | 3.17529                 | 0.03265               | 80.95873              | 0.00000               |
| P6-B11 | <i>Collinsella intestinalis</i> | 0.83753                 | 0.07194               | 87.66914              | 0.22560               |
| P6-B12 | <i>Collinsella intestinalis</i> | 0.81978                 | 0.00000               | 86.39735              | 0.31679               |
| P6-B2  | <i>Collinsella intestinalis</i> | 0.74456                 | 0.00000               | 86.24369              | 0.28054               |
| P6-B3  | <i>Collinsella intestinalis</i> | 0.75311                 | 0.11385               | 89.46062              | 0.26828               |
| P6-B4  | <i>Collinsella intestinalis</i> | 0.04970                 | 0.04470               | 81.48347              | 0.34738               |
| P6-B5  | <i>Collinsella intestinalis</i> | 1.21965                 | 0.00000               | 86.81133              | 0.00000               |
| P6-B6  | <i>Peptoniphilus harei</i>      | 0.00000                 | 0.00000               | 18.34299              | 20.28317              |
| P6-B7  | <i>Collinsella aerofaciens</i>  | 0.02406                 | 0.08259               | 78.76877              | 0.26058               |
| P6-B8  | <i>Collinsella intestinalis</i> | 1.09642                 | 0.03280               | 90.20711              | 0.11975               |
| P6-B9  | <i>Collinsella intestinalis</i> | 1.50241                 | 0.07474               | 85.28664              | 0.00000               |
| P6-C1  | <i>Collinsella intestinalis</i> | 0.06323                 | 0.00000               | 90.75315              | 0.15363               |
| P6-C10 | <i>Collinsella intestinalis</i> | 1.26260                 | 0.00000               | 84.35965              | 0.36637               |
| P6-C11 | <i>Collinsella intestinalis</i> | 0.08661                 | 0.08183               | 84.84703              | 0.53000               |
| P6-C12 |                                 | 0.00000                 | 0.00000               | 0.59619               | 0.00000               |
| P6-C2  | <i>Collinsella intestinalis</i> | 0.96269                 | 0.00000               | 88.12759              | 0.34382               |
| P6-C3  | <i>Collinsella intestinalis</i> | 1.76012                 | 0.05587               | 83.43802              | 0.13792               |
| P6-C4  | <i>Collinsella intestinalis</i> | 0.07054                 | 0.10732               | 90.44832              | 0.08360               |

## Sequence Summary Report

|        |                                                     |         |          |          |          |
|--------|-----------------------------------------------------|---------|----------|----------|----------|
| P6-C5  | <i>Collinsella intestinalis</i>                     | 1.09067 | 0.00000  | 90.76124 | 0.00000  |
| P6-C6  | <i>Eggerthella lenta</i>                            | 9.72812 | 19.75481 | 22.88320 | 6.79556  |
| P6-C7  | <i>Peptoniphilus harei</i>                          | 0.06349 | 0.08096  | 87.33350 | 0.00000  |
| P6-C8  | <i>Collinsella intestinalis</i>                     | 0.06119 | 0.04519  | 90.22181 | 0.08504  |
| P6-C9  | <i>Collinsella intestinalis</i>                     | 0.37149 | 0.00000  | 87.54129 | 0.00000  |
| P6-D1  | <i>Bacteroides cellulosilyticus</i>                 | 0.00000 | 0.10404  | 0.26346  | 29.34336 |
| P6-D10 | <i>Bacteroides vulgatus</i>                         | 0.00000 | 0.09198  | 5.27356  | 25.00190 |
| P6-D11 |                                                     | 0.00000 | 0.08321  | 0.00000  | 0.00000  |
| P6-D12 | <i>Bifidobacterium longum</i>                       | 0.00000 | 0.00000  | 17.08818 | 26.07555 |
| P6-D2  | <i>Collinsella aerofaciens</i>                      | 0.00000 | 0.07956  | 43.76892 | 9.46219  |
| P6-D3  | <i>Collinsella aerofaciens</i>                      | 0.42278 | 0.06742  | 88.72734 | 0.29577  |
| P6-D4  | <i>Bifidobacterium longum</i>                       | 0.00000 | 0.00000  | 16.75673 | 23.60516 |
| P6-D5  |                                                     | 0.00000 | 0.00000  | 0.10158  | 0.41138  |
| P6-D6  |                                                     | 0.00000 | 0.06727  | 0.11505  | 0.00000  |
| P6-D7  |                                                     | 0.00000 | 0.00000  | 0.09090  | 0.00000  |
| P6-D8  |                                                     | 0.00000 | 0.00000  | 0.10317  | 0.36630  |
| P6-D9  | <i>Collinsella aerofaciens</i>                      | 0.00000 | 0.04473  | 43.08762 | 7.73917  |
| P6-E1  | <i>Collinsella aerofaciens</i>                      | 0.48776 | 0.04171  | 85.87531 | 0.26055  |
| P6-E10 |                                                     | 0.00000 | 0.06279  | 0.08149  | 0.00000  |
| P6-E11 | <i>Bifidobacterium longum</i>                       | 0.00000 | 0.00000  | 17.93394 | 26.84629 |
| P6-E12 |                                                     | 0.00000 | 0.05864  | 0.11141  | 0.15901  |
| P6-E2  |                                                     | 0.00000 | 0.09794  | 0.12328  | 0.00000  |
| P6-E3  | <i>Collinsella aerofaciens</i>                      | 0.02175 | 0.00000  | 87.36951 | 0.29076  |
| P6-E4  | <i>Collinsella aerofaciens</i>                      | 0.00000 | 0.00000  | 85.35505 | 0.46543  |
| P6-E5  |                                                     | 0.00000 | 0.05088  | 0.00000  | 0.13020  |
| P6-E6  |                                                     | 0.04599 | 0.00000  | 0.07757  | 0.00000  |
| P6-E7  | <i>Collinsella aerofaciens</i>                      | 0.07318 | 0.00000  | 81.12988 | 0.14626  |
| P6-E8  |                                                     | 0.04474 | 0.00000  | 0.02863  | 18.39104 |
| P6-E9  |                                                     | 0.02917 | 0.00000  | 0.00000  | 0.07482  |
| P6-F1  | <i>Collinsella aerofaciens</i>                      | 0.12430 | 0.04989  | 88.38759 | 0.32333  |
| P6-F10 | <i>Bacteroides uniformis/ Bacteroides rodentium</i> | 0.00000 | 0.00000  | 0.00000  | 35.35425 |
| P6-F11 |                                                     | 0.00000 | 0.00000  | 0.14505  | 0.19331  |
| P6-F12 | <i>Bacteroides cellulosilyticus</i>                 | 0.00000 | 0.00000  | 0.02763  | 32.41464 |
| P6-F2  | <i>Bifidobacterium longum</i>                       | 0.00000 | 0.00000  | 5.72530  | 10.11808 |
| P6-F3  | <i>Bifidobacterium longum</i>                       | 0.03621 | 0.00000  | 16.23888 | 25.21364 |
| P6-F4  | <i>Collinsella aerofaciens</i>                      | 0.07799 | 0.05097  | 88.65441 | 0.34582  |
| P6-F5  |                                                     | 0.00000 | 0.00000  | 0.10286  | 0.20780  |



## Sequence Summary Report

|        |                                     |         |         |          |          |
|--------|-------------------------------------|---------|---------|----------|----------|
| P6-F6  | <i>Collinsella aerofaciens</i>      | 0.23472 | 0.12534 | 88.77833 | 0.10917  |
| P6-F7  |                                     | 0.06347 | 0.00000 | 0.12063  | 0.15586  |
| P6-F8  | <i>Collinsella aerofaciens</i>      | 0.00000 | 0.04827 | 45.05085 | 9.34177  |
| P6-F9  |                                     | 0.00000 | 0.06564 | 0.04082  | 0.20986  |
| P6-G1  | <i>Bacteroides fragilis</i>         | 0.00000 | 0.00000 | 1.35950  | 45.10501 |
| P6-G10 |                                     | 0.00000 | 0.00000 | 0.04410  | 1.43551  |
| P6-G11 | <i>Collinsella aerofaciens</i>      | 0.09276 | 0.00000 | 82.71868 | 0.27251  |
| P6-G12 |                                     | 0.00000 | 0.00000 | 0.00000  | 0.14902  |
| P6-G2  | <i>Collinsella aerofaciens</i>      | 0.10549 | 0.04649 | 83.05247 | 0.24624  |
| P6-G3  | <i>Bacteroides cellulosilyticus</i> | 0.00000 | 0.10601 | 0.04566  | 46.84486 |
| P6-G4  | <i>Collinsella aerofaciens</i>      | 0.00000 | 0.00000 | 45.99707 | 8.15475  |
| P6-G5  | <i>Collinsella aerofaciens</i>      | 0.04633 | 0.00000 | 86.13539 | 0.36727  |
| P6-G6  |                                     | 0.00000 | 0.00000 | 0.00000  | 0.00000  |
| P6-G7  |                                     | 0.00000 | 0.08702 | 0.19198  | 1.95192  |
| P6-G8  | <i>Bacteroides cellulosilyticus</i> | 0.00000 | 0.28700 | 0.10881  | 31.92564 |
| P6-G9  |                                     | 0.00000 | 0.04707 | 0.16848  | 0.14682  |
| P6-H1  | <i>Bacteroides fragilis</i>         | 0.00000 | 0.00000 | 2.23577  | 47.41220 |
| P6-H10 | <i>Bifidobacterium longum</i>       | 0.00000 | 0.07649 | 5.39632  | 9.60726  |
| P6-H11 |                                     | 0.00000 | 0.00000 | 0.07380  | 0.00000  |
| P6-H12 |                                     | 0.03280 | 0.06039 | 0.00000  | 0.00000  |
| P6-H2  | <i>Collinsella aerofaciens</i>      | 0.00000 | 0.00000 | 53.59665 | 9.13661  |
| P6-H3  | <i>Bifidobacterium longum</i>       | 0.02946 | 0.00000 | 14.06397 | 22.14646 |
| P6-H4  |                                     | 0.00000 | 0.06995 | 0.00000  | 0.00000  |
| P6-H5  | <i>Bacteroides dorei</i>            | 0.00000 | 0.10640 | 8.96245  | 19.19089 |
| P6-H6  |                                     | 0.27899 | 0.00000 | 0.15487  | 0.57411  |
| P6-H7  | <i>Collinsella aerofaciens</i>      | 0.05950 | 0.05554 | 11.40488 | 6.62472  |
| P6-H8  |                                     | 0.03547 | 0.00000 | 0.00000  | 0.00000  |
| P6-H9  |                                     | 0.00000 | 0.16372 | 0.54537  | 32.22356 |

## Sequence Summary Report

| Plate7 | 16S rDNA sequencing               | LCA as substrate        |                       | 3-OxoLCA as substrate |                       |
|--------|-----------------------------------|-------------------------|-----------------------|-----------------------|-----------------------|
|        |                                   | 3-OxoLCA production (%) | isoLCA production (%) | LCA production (%)    | isoLCA production (%) |
| P7-A1  |                                   | 0.00000                 | 0.00000               | 0.00000               | 0.08149               |
| P7-A10 | <i>Collinsella intestinalis</i>   | 2.12578                 | 0.00000               | 83.82000              | 0.28239               |
| P7-A11 | <i>Collinsella intestinalis</i>   | 2.08956                 | 0.03026               | 86.53722              | 0.78321               |
| P7-A12 | <i>Collinsella intestinalis</i>   | 2.47589                 | 0.00000               | 87.65660              | 0.97189               |
| P7-A2  | <i>Raoultibacter massiliensis</i> | 10.90595                | 0.02497               | 44.33729              | 0.16447               |
| P7-A3  | <i>Collinsella intestinalis</i>   | 2.15431                 | 0.02110               | 83.68233              | 0.00000               |
| P7-A4  | <i>Collinsella intestinalis</i>   | 1.33325                 | 0.03000               | 86.22256              | 0.09864               |
| P7-A5  |                                   | 0.01376                 | 0.00000               | 0.09730               | 0.00000               |
| P7-A6  | <i>Collinsella intestinalis</i>   | 0.40948                 | 0.05383               | 88.34519              | 0.09547               |
| P7-A7  |                                   | 0.00000                 | 0.00000               | 0.05505               | 0.00000               |
| P7-A8  | <i>Collinsella intestinalis</i>   | 1.51431                 | 0.00000               | 89.24219              | 1.33112               |
| P7-A9  | <i>Collinsella intestinalis</i>   | 2.77175                 | 0.00000               | 89.11561              | 0.29084               |
| P7-B1  | <i>Collinsella intestinalis</i>   | 1.27907                 | 0.00000               | 86.15241              | 0.13486               |
| P7-B10 | <i>Peptoniphilus harei</i>        | 0.00000                 | 0.00000               | 6.05415               | 78.48273              |
| P7-B11 | <i>Collinsella intestinalis</i>   | 1.93719                 | 0.00000               | 86.48642              | 0.63739               |
| P7-B12 | <i>Collinsella intestinalis</i>   | 1.33037                 | 0.00000               | 89.83860              | 0.47198               |
| P7-B2  | <i>Collinsella intestinalis</i>   | 1.88057                 | 0.00000               | 89.96373              | 0.00000               |
| P7-B3  | <i>Collinsella aerofaciens</i>    | 0.73715                 | 0.09642               | 85.48110              | 0.00000               |
| P7-B4  | <i>Collinsella intestinalis</i>   | 1.34818                 | 0.00000               | 90.60103              | 0.31750               |
| P7-B5  | <i>Collinsella intestinalis</i>   | 1.13056                 | 0.00000               | 90.81693              | 0.38595               |
| P7-B6  | <i>Peptoniphilus harei</i>        | 0.00000                 | 0.00000               | 4.57459               | 82.98978              |
| P7-B7  | <i>Collinsella intestinalis</i>   | 0.87547                 | 0.00000               | 91.63545              | 0.00000               |
| P7-B8  | <i>Peptoniphilus harei</i>        | 0.00000                 | 0.01662               | 5.33779               | 78.89307              |
| P7-B9  | <i>Collinsella intestinalis</i>   | 3.04259                 | 0.04234               | 93.14118              | 0.20256               |
| P7-C1  | <i>Collinsella intestinalis</i>   | 1.87849                 | 0.00000               | 87.22774              | 0.24323               |
| P7-C10 | <i>Collinsella intestinalis</i>   | 2.02710                 | 0.04405               | 90.02566              | 0.21949               |
| P7-C11 | <i>Peptoniphilus harei</i>        | 0.01055                 | 0.01592               | 4.60605               | 85.01845              |
| P7-C12 | <i>Peptoniphilus harei</i>        | 0.00000                 | 0.00000               | 5.45745               | 82.41179              |
| P7-C2  | <i>Collinsella intestinalis</i>   | 0.81303                 | 0.00000               | 92.60209              | 0.29581               |
| P7-C3  | <i>Peptoniphilus harei</i>        | 0.00000                 | 0.00000               | 6.02837               | 68.62382              |
| P7-C4  | <i>Collinsella intestinalis</i>   | 0.69611                 | 0.00000               | 93.53722              | 0.24009               |

## Sequence Summary Report

|        |                                 |          |         |          |          |
|--------|---------------------------------|----------|---------|----------|----------|
| P7-C5  | <i>Collinsella intestinalis</i> | 0.91133  | 0.00000 | 94.41519 | 0.30115  |
| P7-C6  | <i>Collinsella intestinalis</i> | 1.22687  | 0.00000 | 93.63386 | 0.18295  |
| P7-C7  | <i>Collinsella intestinalis</i> | 0.06364  | 0.00000 | 93.61567 | 0.20943  |
| P7-C8  | <i>Collinsella intestinalis</i> | 0.03371  | 0.00000 | 92.56804 | 0.41874  |
| P7-C9  | <i>Collinsella intestinalis</i> | 0.26536  | 0.00000 | 93.64264 | 0.22941  |
| P7-D1  | <i>Collinsella intestinalis</i> | 2.41715  | 0.01726 | 90.66354 | 0.28759  |
| P7-D10 | <i>Collinsella intestinalis</i> | 0.04593  | 0.03971 | 92.22222 | 0.27757  |
| P7-D11 | <i>Collinsella intestinalis</i> | 3.30840  | 0.00000 | 91.51434 | 0.27907  |
| P7-D12 | <i>Collinsella intestinalis</i> | 1.38002  | 0.00000 | 92.70704 | 0.00000  |
| P7-D2  | <i>Collinsella intestinalis</i> | 3.40013  | 0.00000 | 95.32890 | 0.00000  |
| P7-D3  | <i>Collinsella intestinalis</i> | 2.66549  | 0.00000 | 94.46089 | 0.35258  |
| P7-D4  | <i>Collinsella intestinalis</i> | 1.19199  | 0.04695 | 92.95004 | 0.09506  |
| P7-D5  | <i>Collinsella intestinalis</i> | 1.87314  | 0.00000 | 95.63740 | 0.13336  |
| P7-D6  | <i>Collinsella intestinalis</i> | 0.05907  | 0.00000 | 94.85396 | 0.29450  |
| P7-D7  | <i>Collinsella intestinalis</i> | 0.21167  | 0.00000 | 93.29147 | 0.35016  |
| P7-D8  | <i>Collinsella intestinalis</i> | 0.61819  | 0.00000 | 93.07241 | 0.25222  |
| P7-D9  | <i>Collinsella intestinalis</i> | 1.49679  | 0.00000 | 95.15976 | 0.17585  |
| P7-E1  | <i>Collinsella intestinalis</i> | 4.98890  | 0.00000 | 88.38053 | 0.22665  |
| P7-E10 | <i>Collinsella intestinalis</i> | 0.27568  | 0.09186 | 92.58653 | 0.20042  |
| P7-E11 | <i>Collinsella intestinalis</i> | 1.63905  | 0.03831 | 92.41037 | 0.00000  |
| P7-E12 | <i>Collinsella intestinalis</i> | 1.21051  | 0.00000 | 89.24012 | 0.32901  |
| P7-E2  | <i>Collinsella intestinalis</i> | 3.23527  | 0.00000 | 94.40808 | 0.33750  |
| P7-E3  | <i>Gordonibacter pamelaee</i>   | 22.82634 | 3.64573 | 46.80347 | 16.49276 |
| P7-E4  | <i>Collinsella intestinalis</i> | 0.05923  | 0.00000 | 94.41703 | 0.36419  |
| P7-E5  | <i>Collinsella intestinalis</i> | 1.59325  | 0.04210 | 94.12225 | 0.27851  |
| P7-E6  | <i>Collinsella intestinalis</i> | 0.15709  | 0.00000 | 95.40575 | 0.17234  |
| P7-E7  | <i>Collinsella intestinalis</i> | 0.36160  | 0.00000 | 93.02594 | 0.00000  |
| P7-E8  | <i>Collinsella intestinalis</i> | 2.34159  | 0.00000 | 93.28704 | 0.37041  |
| P7-E9  | <i>Collinsella intestinalis</i> | 4.52619  | 0.00000 | 95.69402 | 0.00000  |
| P7-F1  | <i>Collinsella intestinalis</i> | 4.13674  | 0.00000 | 89.59086 | 0.18593  |
| P7-F10 | <i>Eggerthella lenta</i>        | 6.84812  | 7.43788 | 17.86148 | 4.72162  |
| P7-F11 | <i>Collinsella intestinalis</i> | 2.83460  | 0.05118 | 90.98127 | 0.29330  |
| P7-F12 | <i>Collinsella intestinalis</i> | 0.49667  | 0.00000 | 90.12974 | 0.00000  |
| P7-F2  | <i>Collinsella aerofaciens</i>  | 0.00000  | 0.04336 | 55.87166 | 9.11060  |
| P7-F3  | <i>Collinsella intestinalis</i> | 2.12561  | 0.00000 | 95.80454 | 0.26831  |
| P7-F4  | <i>Collinsella intestinalis</i> | 0.93680  | 0.00000 | 94.96916 | 0.14224  |
| P7-F5  | <i>Collinsella intestinalis</i> | 1.06129  | 0.00000 | 93.71275 | 0.29961  |

## Sequence Summary Report

|        |                           |          |          |          |          |
|--------|---------------------------|----------|----------|----------|----------|
| P7-F6  | Collinsella intestinalis  | 0.48780  | 0.03590  | 97.99953 | 0.00000  |
| P7-F7  | Collinsella intestinalis  | 0.14085  | 0.05765  | 92.90184 | 0.21848  |
| P7-F8  | Peptoniphilus harei       | 0.00000  | 0.03670  | 5.40581  | 77.82719 |
| P7-F9  | Collinsella intestinalis  | 0.07258  | 0.00000  | 92.60414 | 0.34866  |
| P7-G1  | Collinsella intestinalis  | 8.86156  | 0.03543  | 91.46105 | 0.28099  |
| P7-G10 | Collinsella intestinalis  | 0.19588  | 0.00000  | 88.43309 | 0.26984  |
| P7-G11 | Collinsella intestinalis  | 0.05257  | 0.00000  | 87.56368 | 0.15353  |
| P7-G12 | Monoglobus pectinilyticus | 0.19071  | 0.00000  | 29.96833 | 0.26837  |
| P7-G2  | Collinsella intestinalis  | 3.93531  | 0.00000  | 93.39960 | 0.28829  |
| P7-G3  | Collinsella intestinalis  | 3.42268  | 0.00000  | 92.52948 | 0.27991  |
| P7-G4  |                           | 0.00000  | 0.00000  | 0.00000  | 0.00000  |
| P7-G5  |                           | 0.00000  | 0.00000  | 0.00000  | 0.00000  |
| P7-G6  | Collinsella intestinalis  | 0.99822  | 0.00000  | 91.11152 | 0.27057  |
| P7-G7  | Eggerthella lenta         | 20.90626 | 3.87219  | 11.41579 | 3.47197  |
| P7-G8  |                           | 0.28227  | 0.00000  | 87.10975 | 0.23175  |
| P7-G9  | Eggerthella lenta         | 36.55302 | 47.54130 | 25.20126 | 7.50220  |
| P7-H1  |                           | 0.00000  | 0.00000  | 0.04876  | 0.00000  |
| P7-H10 | Monoglobus pectinilyticus | 0.04172  | 0.00000  | 27.36535 | 0.23802  |
| P7-H11 | Collinsella intestinalis  | 0.36013  | 0.00000  | 80.45786 | 0.16247  |
| P7-H12 | Peptoniphilus harei       | 0.00000  | 0.00000  | 0.02855  | 87.94745 |
| P7-H2  | Collinsella intestinalis  | 2.68505  | 0.00000  | 91.02001 | 0.22526  |
| P7-H3  | Collinsella intestinalis  | 2.83854  | 0.00000  | 86.13365 | 0.08121  |
| P7-H4  | Peptoniphilus harei       | 0.00000  | 0.00000  | 4.88038  | 82.13127 |
| P7-H5  |                           | 0.18895  | 0.00000  | 0.02948  | 0.00000  |
| P7-H6  | Collinsella intestinalis  | 1.12293  | 0.00000  | 82.14284 | 0.09609  |
| P7-H7  | Collinsella intestinalis  | 0.12046  | 0.03505  | 85.77946 | 0.00000  |
| P7-H8  | Collinsella intestinalis  | 0.79596  | 0.00000  | 87.11181 | 0.15417  |
| P7-H9  | Collinsella intestinalis  | 0.06189  | 0.00000  | 87.97733 | 0.31982  |

## Sequence Summary Report

| Plate8 | 16S rDNA sequencing              | LCA as substrate        |                       | 3-OxoLCA as substrate |                       |
|--------|----------------------------------|-------------------------|-----------------------|-----------------------|-----------------------|
|        |                                  | 3-OxoLCA production (%) | isoLCA production (%) | LCA production (%)    | isoLCA production (%) |
| P8-A1  |                                  | 0.02605                 | 0.00000               | 0.11567               | 0.21029               |
| P8-A10 | <i>Bifidobacterium longum</i>    | 0.24630                 | 0.07986               | 17.49833              | 26.42472              |
| P8-A11 | <i>Collinsella aerofaciens</i>   | 0.11551                 | 0.10361               | 8.99470               | 5.57623               |
| P8-A12 | <i>Collinsella aerofaciens</i>   | 0.04131                 | 0.10457               | 79.74763              | 0.13274               |
| P8-A2  | <i>Bifidobacterium longum</i>    | 0.09291                 | 0.04534               | 16.59738              | 25.46388              |
| P8-A3  | <i>Collinsella aerofaciens</i>   | 0.03493                 | 0.00000               | 49.90561              | 8.22788               |
| P8-A4  | <i>Collinsella aerofaciens</i>   | 0.00000                 | 0.00000               | 84.23534              | 0.00000               |
| P8-A5  | <i>Collinsella aerofaciens</i>   | 0.15796                 | 0.03469               | 48.69747              | 10.11218              |
| P8-A6  | <i>Collinsella aerofaciens</i>   | 0.05045                 | 0.05990               | 83.43207              | 0.00000               |
| P8-A7  | <i>Collinsella aerofaciens</i>   | 0.04655                 | 0.05439               | 77.04708              | 0.20146               |
| P8-A8  | <i>Collinsella aerofaciens</i>   | 0.02358                 | 0.09240               | 81.20127              | 0.22826               |
| P8-A9  |                                  | 0.09964                 | 0.00000               | 0.06667               | 0.10516               |
| P8-B1  | <i>Peptoniphilus harei</i>       | 0.15435                 | 0.12996               | 5.38119               | 76.32120              |
| P8-B10 |                                  | 0.04593                 | 0.04818               | 0.68866               | 0.12481               |
| P8-B11 | <i>Collinsella intestinalis</i>  | 5.66346                 | 0.15010               | 85.24643              | 0.28681               |
| P8-B12 | <i>Peptoniphilus harei</i>       | 0.02900                 | 0.07365               | 4.17572               | 82.19406              |
| P8-B2  | <i>Peptoniphilus harei</i>       | 0.00000                 | 0.15806               | 5.64757               | 77.09931              |
| P8-B3  |                                  | 0.03679                 | 0.05010               | 0.00000               | 0.00000               |
| P8-B4  |                                  | 0.07458                 | 0.04139               | 0.42340               | 23.49654              |
| P8-B5  | <i>Monoglobus pectinilyticus</i> | 0.28013                 | 0.07043               | 33.09927              | 0.34213               |
| P8-B6  | <i>Collinsella intestinalis</i>  | 13.70085                | 0.05964               | 87.37722              | 0.00000               |
| P8-B7  | <i>Peptoniphilus harei</i>       | 0.03342                 | 0.04146               | 5.61610               | 74.96311              |
| P8-B8  | <i>Collinsella aerofaciens</i>   | 0.06655                 | 0.05562               | 85.90964              | 0.30073               |
| P8-B9  | <i>Monoglobus pectinilyticus</i> | 2.49782                 | 0.00000               | 32.55076              | 0.24425               |
| P8-C1  | <i>Monoglobus pectinilyticus</i> | 4.17787                 | 0.06604               | 36.30624              | 0.08437               |
| P8-C10 | <i>Collinsella intestinalis</i>  | 12.69198                | 0.05114               | 86.84912              | 0.27043               |
| P8-C11 | <i>Monoglobus pectinilyticus</i> | 1.59023                 | 0.00000               | 31.83882              | 0.20927               |
| P8-C12 | <i>Collinsella intestinalis</i>  | 21.10642                | 0.06973               | 86.36487              | 0.25369               |
| P8-C2  | <i>Collinsella intestinalis</i>  | 1.08661                 | 0.00000               | 93.97437              | 0.22891               |
| P8-C3  | <i>Collinsella intestinalis</i>  | 15.04968                | 0.13271               | 94.27427              | 0.20884               |
| P8-C4  | <i>Monoglobus pectinilyticus</i> | 0.34233                 | 0.17082               | 35.61409              | 0.32007               |

## Sequence Summary Report

|        |                           |          |          |          |          |
|--------|---------------------------|----------|----------|----------|----------|
| P8-C5  | Monoglobus pectinilyticus | 0.25077  | 0.13682  | 32.48034 | 0.00000  |
| P8-C6  |                           | 0.02147  | 0.17407  | 0.03886  | 0.00000  |
| P8-C7  | Collinsella intestinalis  | 8.74024  | 0.02187  | 90.66014 | 0.25646  |
| P8-C8  | Monoglobus pectinilyticus | 2.39225  | 0.16230  | 90.01398 | 0.08637  |
| P8-C9  | Collinsella intestinalis  | 1.45061  | 0.00000  | 90.83013 | 0.24617  |
| P8-D1  | Collinsella intestinalis  | 23.14536 | 0.00000  | 93.26084 | 0.13663  |
| P8-D10 | Monoglobus pectinilyticus | 1.27344  | 0.03870  | 34.63793 | 0.29143  |
| P8-D11 | Peptoniphilus harei       | 0.12227  | 0.12020  | 4.62060  | 78.05975 |
| P8-D12 | Collinsella intestinalis  | 3.78555  | 0.00000  | 93.76057 | 0.00000  |
| P8-D2  | Eggerthella lenta         | 48.81447 | 8.13633  | 47.23950 | 22.06168 |
| P8-D3  | Collinsella intestinalis  | 12.84827 | 0.00000  | 93.06784 | 0.07164  |
| P8-D4  | Peptoniphilus harei       | 0.07175  | 0.00000  | 5.20410  | 76.24708 |
| P8-D5  | Collinsella intestinalis  | 3.89545  | 0.00000  | 94.34285 | 0.00000  |
| P8-D6  | Collinsella intestinalis  | 0.78667  | 0.00000  | 92.75317 | 0.00000  |
| P8-D7  | Monoglobus pectinilyticus | 0.31686  | 0.00000  | 32.00372 | 0.22009  |
| P8-D8  | Eggerthella lenta         | 43.03595 | 9.90261  | 44.69670 | 17.64921 |
| P8-D9  |                           | 0.14188  | 0.00000  | 0.00000  | 0.00000  |
| P8-E1  |                           | 0.16003  | 0.09205  | 0.08349  | 0.00000  |
| P8-E10 | Collinsella intestinalis  | 6.31235  | 0.20942  | 89.26881 | 0.00000  |
| P8-E11 | Monoglobus pectinilyticus | 1.27524  | 0.07853  | 36.88274 | 0.07824  |
| P8-E12 | Monoglobus pectinilyticus | 1.30826  | 0.31534  | 37.08392 | 0.40482  |
| P8-E2  | Peptoniphilus harei       | 0.09433  | 0.00000  | 5.56548  | 73.71652 |
| P8-E3  |                           | 0.02717  | 0.00000  | 0.03038  | 0.00000  |
| P8-E4  | Monoglobus pectinilyticus | 0.39670  | 0.21272  | 33.28813 | 0.23889  |
| P8-E5  | Collinsella intestinalis  | 4.68123  | 0.03457  | 94.03777 | 0.21820  |
| P8-E6  | Monoglobus pectinilyticus | 0.72109  | 0.10450  | 31.29797 | 0.17059  |
| P8-E7  | Collinsella intestinalis  | 0.08094  | 0.16421  | 91.25153 | 0.00000  |
| P8-E8  | Peptoniphilus harei       | 0.00000  | 0.04227  | 5.51501  | 73.74883 |
| P8-E9  |                           | 0.13039  | 0.04484  | 0.04554  | 0.00000  |
| P8-F1  |                           | 0.17217  | 0.07425  | 0.00000  | 0.00000  |
| P8-F10 | Peptoniphilus harei       | 0.09541  | 0.11228  | 5.43071  | 76.19893 |
| P8-F11 | Peptoniphilus harei       | 3.30883  | 0.45147  | 0.02676  | 94.68729 |
| P8-F12 | Collinsella intestinalis  | 6.89357  | 0.14064  | 0.01545  | 96.39206 |
| P8-F2  | Eggerthella lenta         | 20.16405 | 11.92693 | 79.67543 | 17.84863 |
| P8-F3  | Eggerthella lenta         | 50.26139 | 10.12897 | 42.85667 | 17.01935 |
| P8-F4  | Monoglobus pectinilyticus | 1.66689  | 0.05879  | 28.27532 | 0.00000  |
| P8-F5  | Peptoniphilus harei       | 0.00000  | 0.08212  | 5.00071  | 75.71169 |

## Sequence Summary Report

|        |                           |          |          |          |          |
|--------|---------------------------|----------|----------|----------|----------|
| P8-F6  | Peptoniphilus harei       | 0.00000  | 0.04021  | 5.57630  | 73.55224 |
| P8-F7  | Collinsella intestinalis  | 7.33921  | 0.03838  | 90.50494 | 0.00000  |
| P8-F8  | Collinsella intestinalis  | 7.96172  | 0.03035  | 91.93853 | 0.00000  |
| P8-F9  | Collinsella intestinalis  | 5.17015  | 0.05536  | 93.09270 | 0.00000  |
| P8-G1  | Eggerthella lenta         | 45.25475 | 9.29648  | 35.89902 | 13.19238 |
| P8-G10 | Peptoniphilus harei       | 0.02419  | 0.07393  | 4.70986  | 77.53346 |
| P8-G11 | Collinsella aerofaciens   | 0.08311  | 0.05493  | 85.09003 | 0.24411  |
| P8-G12 | Peptoniphilus harei       | 0.98549  | 0.06522  | 42.51834 | 0.38487  |
| P8-G2  | Eggerthella lenta         | 0.04235  | 0.09199  | 88.44842 | 0.00000  |
| P8-G3  | Peptoniphilus harei       | 0.05769  | 0.00000  | 16.81608 | 21.53425 |
| P8-G4  | Collinsella intestinalis  | 0.04522  | 0.10061  | 86.12116 | 0.30557  |
| P8-G5  | Monoglobus pectinilyticus | 1.21695  | 0.00000  | 34.66803 | 0.21776  |
| P8-G6  |                           | 0.20583  | 0.27653  | 0.50734  | 26.58322 |
| P8-G7  | Collinsella intestinalis  | 1.14283  | 0.06875  | 88.49695 | 0.19565  |
| P8-G8  | Collinsella intestinalis  | 0.94443  | 0.03972  | 89.67492 | 0.00000  |
| P8-G9  |                           | 0.06353  | 0.08582  | 0.00000  | 0.00000  |
| P8-H1  | Monoglobus pectinilyticus | 3.10662  | 0.09463  | 42.75429 | 0.39168  |
| P8-H10 | Monoglobus pectinilyticus | 1.16742  | 0.14987  | 30.50877 | 0.23948  |
| P8-H11 | Monoglobus pectinilyticus | 0.59432  | 0.00000  | 30.63150 | 0.17592  |
| P8-H12 | Peptoniphilus harei       | 0.06031  | 0.05304  | 4.59360  | 80.87113 |
| P8-H2  | Monoglobus pectinilyticus | 2.08661  | 0.08425  | 44.31678 | 0.31906  |
| P8-H3  | Monoglobus pectinilyticus | 1.49068  | 0.04943  | 36.89020 | 0.37450  |
| P8-H4  | Monoglobus pectinilyticus | 1.41018  | 0.03699  | 7.72229  | 2.56529  |
| P8-H5  | Eggerthella lenta         | 37.00561 | 14.29137 | 3.33597  | 1.08090  |
| P8-H6  | Monoglobus pectinilyticus | 1.41475  | 0.12192  | 31.71054 | 0.08246  |
| P8-H7  |                           | 0.07230  | 0.00000  | 0.00000  | 0.00000  |
| P8-H8  | Monoglobus pectinilyticus | 0.78278  | 0.26257  | 30.97117 | 0.06489  |
| P8-H9  | Monoglobus pectinilyticus | 0.81762  | 0.00000  | 34.11502 | 0.22899  |

## Sequence Summary Report

| Plate9 | 16S rDNA sequencing             | LCA as substrate        |                       | 3-OxoLCA as substrate |                       |
|--------|---------------------------------|-------------------------|-----------------------|-----------------------|-----------------------|
|        |                                 | 3-OxoLCA production (%) | isoLCA production (%) | LCA production (%)    | isoLCA production (%) |
| P9-A1  | <i>Collinsella intestinalis</i> | 7.28082                 | 0.00000               | 99.07172              | 0.00000               |
| P9-A10 | <i>Collinsella intestinalis</i> | 4.40681                 | 0.00000               | 98.39648              | 0.00000               |
| P9-A11 | <i>Collinsella intestinalis</i> | 4.18293                 | 0.00000               | 90.20278              | 0.00000               |
| P9-A12 | <i>Collinsella intestinalis</i> | 5.77091                 | 0.00000               | 98.97189              | 0.00000               |
| P9-A2  | <i>Collinsella intestinalis</i> | 3.96405                 | 0.00000               | 99.39062              | 0.51599               |
| P9-A3  |                                 | 0.00000                 | 0.05769               | 0.00000               | 0.00000               |
| P9-A4  |                                 | 0.07546                 | 0.00000               | 0.00000               | 0.00000               |
| P9-A5  | <i>Collinsella intestinalis</i> | 2.56883                 | 0.07237               | 99.74925              | 0.00000               |
| P9-A6  | <i>Collinsella intestinalis</i> | 2.70121                 | 0.06270               | 99.14807              | 0.00000               |
| P9-A7  | <i>Collinsella intestinalis</i> | 0.80434                 | 0.00000               | 99.30726              | 0.00000               |
| P9-A8  | <i>Collinsella intestinalis</i> | 2.28450                 | 0.00000               | 98.01761              | 0.29373               |
| P9-A9  | <i>Collinsella intestinalis</i> | 3.19246                 | 0.09187               | 99.20526              | 0.00000               |
| P9-B1  | <i>Collinsella intestinalis</i> | 4.39110                 | 0.09839               | 96.18479              | 0.20904               |
| P9-B10 | <i>Collinsella aerofaciens</i>  | 0.00000                 | 0.00000               | 15.12151              | 2.67324               |
| P9-B11 | <i>Bifidobacterium longum</i>   | 0.05328                 | 0.07403               | 0.00000               | 97.24012              |
| P9-B12 |                                 | 0.00000                 | 0.06169               | 0.00000               | 0.12563               |
| P9-B2  | <i>Collinsella intestinalis</i> | 6.02249                 | 0.13259               | 98.65584              | 0.17824               |
| P9-B3  | <i>Peptoniphilus harei</i>      | 0.00000                 | 0.00000               | 2.62904               | 40.49974              |
| P9-B4  | <i>Bifidobacterium longum</i>   | 0.03795                 | 0.00000               | 2.40203               | 5.02133               |
| P9-B5  |                                 | 0.00000                 | 0.05663               | 0.00000               | 3.47494               |
| P9-B6  | <i>Collinsella aerofaciens</i>  | 0.08775                 | 0.00000               | 99.72768              | 0.00000               |
| P9-B7  | <i>Collinsella aerofaciens</i>  | 0.00000                 | 0.00000               | 17.07097              | 2.63041               |
| P9-B8  |                                 | 0.03520                 | 0.00000               | 0.00000               | 0.00000               |
| P9-B9  |                                 | 0.04006                 | 0.00000               | 0.00000               | 0.00000               |
| P9-C1  |                                 | 0.00000                 | 0.00000               | 0.00000               | 0.00000               |
| P9-C10 | <i>Bifidobacterium longum</i>   | 0.07964                 | 0.00000               | 1.88794               | 3.55003               |
| P9-C11 | <i>Bifidobacterium longum</i>   | 0.09238                 | 0.00000               | 24.48863              | 43.94762              |
| P9-C12 | <i>Collinsella aerofaciens</i>  | 0.69941                 | 0.00000               | 97.11219              | 0.90159               |
| P9-C2  | <i>Paroisenella catena</i>      | 0.00000                 | 0.07356               | 0.81275               | 95.04366              |
| P9-C3  |                                 | 0.00000                 | 0.00000               | 0.00000               | 0.00000               |
| P9-C4  |                                 | 0.00000                 | 0.00000               | 0.00000               | 3.06098               |



## Sequence Summary Report

|        |                                   |          |         |          |          |
|--------|-----------------------------------|----------|---------|----------|----------|
| P9-C5  |                                   | 0.04963  | 0.09247 | 0.03656  | 0.00000  |
| P9-C6  |                                   | 0.04087  | 0.05772 | 0.91301  | 1.61369  |
| P9-C7  |                                   | 0.00000  | 0.00000 | 0.00000  | 4.85521  |
| P9-C8  | <i>Parolsenella catena</i>        | 0.00000  | 0.00000 | 0.11359  | 96.75234 |
| P9-C9  | <i>Parabacteroides distasonis</i> | 0.08782  | 0.72376 | 2.67119  | 41.39989 |
| P9-D1  |                                   | 0.00000  | 0.09846 | 0.32721  | 0.12020  |
| P9-D10 |                                   | 0.00000  | 0.00000 | 0.00000  | 0.00000  |
| P9-D11 |                                   | 0.05300  | 0.00000 | 0.00000  | 0.00000  |
| P9-D12 | <i>Collinsella aerofaciens</i>    | 0.63862  | 0.12399 | 98.69657 | 0.13602  |
| P9-D2  | <i>Collinsella aerofaciens</i>    | 0.00000  | 0.00000 | 14.88628 | 2.49990  |
| P9-D3  |                                   | 0.00000  | 0.08075 | 0.00000  | 0.00000  |
| P9-D4  | <i>Collinsella aerofaciens</i>    | 0.05718  | 0.00000 | 98.91456 | 0.00000  |
| P9-D5  | <i>Parolsenella catena</i>        | 0.03272  | 0.08326 | 0.43914  | 97.18028 |
| P9-D6  |                                   | 0.00000  | 0.00000 | 0.03597  | 0.00000  |
| P9-D7  |                                   | 0.00000  | 0.09548 | 0.08559  | 11.99631 |
| P9-D8  | <i>Collinsella aerofaciens</i>    | 0.13098  | 0.00000 | 99.11986 | 0.11436  |
| P9-D9  | <i>Parabacteroides chongii</i>    | 0.00000  | 0.00000 | 0.08285  | 16.12584 |
| P9-E1  |                                   | 0.00000  | 0.13739 | 0.00000  | 0.00000  |
| P9-E10 |                                   | 0.00000  | 0.05884 | 0.00000  | 0.07089  |
| P9-E11 | <i>Bifidobacterium longum</i>     | 0.00000  | 0.00000 | 1.14001  | 3.40083  |
| P9-E12 |                                   | 0.03352  | 0.06095 | 0.00000  | 0.00000  |
| P9-E2  |                                   | 0.00000  | 0.06122 | 0.00000  | 0.00000  |
| P9-E3  | <i>Collinsella aerofaciens</i>    | 0.59485  | 0.11064 | 95.54359 | 0.00000  |
| P9-E4  |                                   | 0.00000  | 0.00000 | 0.02774  | 0.00000  |
| P9-E5  |                                   | 0.00000  | 0.00000 | 0.00000  | 0.00000  |
| P9-E6  | <i>Collinsella aerofaciens</i>    | 0.00000  | 0.05504 | 23.01025 | 4.02213  |
| P9-E7  |                                   | 0.00000  | 0.00000 | 0.02937  | 0.00000  |
| P9-E8  |                                   | 0.00000  | 0.00000 | 0.03200  | 0.10620  |
| P9-E9  |                                   | 0.00000  | 0.00000 | 0.00000  | 7.37578  |
| P9-F1  | <i>Bifidobacterium longum</i>     | 0.04859  | 0.00000 | 2.24862  | 4.15510  |
| P9-F10 | <i>Collinsella intestinalis</i>   | 10.64282 | 0.70182 | 94.95824 | 0.00000  |
| P9-F11 | <i>Peptoniphilus harei</i>        | 0.00000  | 0.00000 | 3.51141  | 40.56271 |
| P9-F12 | <i>Collinsella intestinalis</i>   | 4.96933  | 0.00000 | 94.11615 | 0.47160  |
| P9-F2  | <i>Collinsella intestinalis</i>   | 3.68657  | 0.06006 | 97.69122 | 0.00000  |
| P9-F3  | <i>Collinsella intestinalis</i>   | 4.91153  | 0.11714 | 96.51039 | 0.00000  |
| P9-F4  | <i>Collinsella intestinalis</i>   | 1.76157  | 0.00000 | 99.56819 | 0.15655  |
| P9-F5  | <i>Collinsella intestinalis</i>   | 2.78870  | 0.04439 | 96.61440 | 0.30722  |

## Sequence Summary Report

|        |                                 |          |         |          |          |
|--------|---------------------------------|----------|---------|----------|----------|
| P9-F6  | <i>Collinsella intestinalis</i> | 2.67907  | 0.00000 | 95.50631 | 0.27353  |
| P9-F7  | <i>Peptoniphilus harei</i>      | 0.00000  | 0.00000 | 4.24911  | 48.63308 |
| P9-F8  | <i>Collinsella intestinalis</i> | 2.17470  | 0.00000 | 97.26683 | 0.12911  |
| P9-F9  | <i>Collinsella intestinalis</i> | 3.59277  | 0.00000 | 96.47777 | 0.12295  |
| P9-G1  | <i>Collinsella intestinalis</i> | 6.97920  | 0.00000 | 95.04295 | 0.00000  |
| P9-G10 | <i>Peptoniphilus harei</i>      | 0.05127  | 0.00000 | 4.18809  | 40.77875 |
| P9-G11 | <i>Collinsella intestinalis</i> | 2.11541  | 0.00000 | 96.49217 | 0.07038  |
| P9-G12 | <i>Collinsella intestinalis</i> | 4.45546  | 0.00000 | 95.76433 | 0.30002  |
| P9-G2  | <i>Collinsella intestinalis</i> | 5.62839  | 0.00000 | 94.49581 | 0.00000  |
| P9-G3  | <i>Collinsella intestinalis</i> | 4.93217  | 0.05593 | 96.59442 | 0.10322  |
| P9-G4  | <i>Collinsella intestinalis</i> | 1.59201  | 0.00000 | 97.11176 | 0.15258  |
| P9-G5  | <i>Collinsella intestinalis</i> | 0.60457  | 0.00000 | 97.72769 | 0.13630  |
| P9-G6  | <i>Collinsella intestinalis</i> | 1.08709  | 0.00000 | 97.34953 | 0.16526  |
| P9-G7  | <i>Collinsella intestinalis</i> | 0.72354  | 0.00000 | 95.38806 | 0.28939  |
| P9-G8  | <i>Collinsella intestinalis</i> | 0.63494  | 0.00000 | 92.89789 | 0.10749  |
| P9-G9  | <i>Collinsella intestinalis</i> | 3.89871  | 0.00000 | 96.45528 | 0.14326  |
| P9-H1  | <i>Anaerococcus rubeifantis</i> | 0.00000  | 0.00000 | 3.25783  | 0.00000  |
| P9-H10 | <i>Collinsella intestinalis</i> | 4.23827  | 0.00000 | 99.60749 | 0.12120  |
| P9-H11 | <i>Collinsella intestinalis</i> | 2.62418  | 0.00000 | 96.81246 | 0.08107  |
| P9-H12 | <i>Collinsella intestinalis</i> | 12.69548 | 0.00000 | 95.72582 | 0.09783  |
| P9-H2  | <i>Collinsella intestinalis</i> | 2.85363  | 0.00000 | 93.15008 | 0.29110  |
| P9-H3  | <i>Collinsella intestinalis</i> | 2.86053  | 0.05673 | 96.41722 | 0.32567  |
| P9-H4  | <i>Collinsella intestinalis</i> | 1.24102  | 0.00000 | 96.04583 | 0.12649  |
| P9-H5  | <i>Peptoniphilus harei</i>      | 0.00000  | 0.00000 | 3.42344  | 50.89230 |
| P9-H6  | <i>Collinsella intestinalis</i> | #DIV/0!  | #DIV/0! | 97.23289 | 0.21211  |
| P9-H7  | <i>Collinsella intestinalis</i> | 2.35148  | 0.00000 | 97.70918 | 0.09586  |
| P9-H8  | <i>Collinsella intestinalis</i> | 0.80755  | 0.00000 | 94.58732 | 0.28606  |
| P9-H9  | <i>Collinsella intestinalis</i> | 2.80643  | 0.00000 | 97.22985 | 0.12701  |

## Sequence Summary Report

| Plate10 | 16S rDNA sequencing              | LCA as substrate        |                       | 3-OxoLCA as substrate |                       |
|---------|----------------------------------|-------------------------|-----------------------|-----------------------|-----------------------|
|         |                                  | 3-OxoLCA production (%) | isoLCA production (%) | LCA production (%)    | isoLCA production (%) |
| P10-A1  | <i>Collinsella intestinalis</i>  | 34.13153                | 0.04609               | 91.13490              | 0.10915               |
| P10-A10 |                                  | 0.04946                 | 0.00000               | 0.00000               | 3.32532               |
| P10-A11 | <i>Peptoniphilus harei</i>       | 0.20042                 | 0.00000               | 3.45043               | 43.48243              |
| P10-A12 | <i>Peptoniphilus harei</i>       | 0.05607                 | 0.00000               | 3.29957               | 48.86068              |
| P10-A2  | <i>Monoglobus pectinilyticus</i> | 2.98334                 | 0.00000               | 0.22340               | 0.00000               |
| P10-A3  | <i>Monoglobus pectinilyticus</i> | 2.87063                 | 0.00000               | 0.04888               | 0.00000               |
| P10-A4  | <i>Collinsella intestinalis</i>  | 27.27120                | 0.09959               | 91.05681              | 0.00000               |
| P10-A5  | <i>Collinsella intestinalis</i>  | 0.09288                 | 0.12955               | 94.76505              | 0.44230               |
| P10-A6  |                                  | 0.97173                 | 0.00000               | 0.20248               | 0.00000               |
| P10-A7  |                                  | 0.09553                 | 0.13916               | 0.20765               | 0.00000               |
| P10-A8  |                                  | 0.13614                 | 0.00000               | 0.19039               | 0.00000               |
| P10-A9  | <i>Peptoniphilus harei</i>       | 20.94046                | 0.06083               | 70.95821              | 17.56274              |
| P10-B1  | <i>Monoglobus pectinilyticus</i> | 2.72237                 | 0.00000               | 0.10888               | 0.00000               |
| P10-B10 |                                  | 0.63316                 | 0.30146               | 0.44183               | 0.00000               |
| P10-B11 | <i>Collinsella aerofaciens</i>   | 0.53360                 | 0.24133               | 85.19406              | 0.17345               |
| P10-B12 | <i>Collinsella aerofaciens</i>   | 0.37665                 | 0.00000               | 91.23036              | 0.32686               |
| P10-B2  |                                  | 0.14864                 | 0.00000               | 0.00000               | 0.00000               |
| P10-B3  | <i>Collinsella intestinalis</i>  | 33.52895                | 0.00000               | 87.06503              | 0.00000               |
| P10-B4  | <i>Monoglobus pectinilyticus</i> | 1.48688                 | 0.00000               | 0.00000               | 0.00000               |
| P10-B5  |                                  | 0.15448                 | 0.00000               | 0.03048               | 0.00000               |
| P10-B6  | <i>Collinsella intestinalis</i>  | 0.10106                 | 0.18386               | 86.38025              | 0.17592               |
| P10-B7  | <i>Collinsella intestinalis</i>  | 26.11192                | 0.00000               | 86.18871              | 0.00000               |
| P10-B8  | <i>Collinsella intestinalis</i>  | 16.11306                | 0.88903               | 86.27787              | 0.00000               |
| P10-B9  |                                  | 0.13231                 | 0.00000               | 0.13349               | 3.05035               |
| P10-C1  |                                  | 0.08269                 | 0.09747               | 0.04869               | 0.32269               |
| P10-C2  | <i>Collinsella intestinalis</i>  | 8.37484                 | 0.16038               | 87.09328              | 0.27866               |
| P10-C3  | <i>Collinsella intestinalis</i>  | 6.84692                 | 0.00000               | 89.59874              | 0.00000               |
| P10-C4  | <i>Collinsella intestinalis</i>  | 29.96992                | 0.17135               | 90.76710              | 0.00000               |
| P10-C5  |                                  | 0.16509                 | 0.00000               | 0.04407               | 0.00000               |
| P10-C6  |                                  | 0.07534                 | 0.00000               | 0.00000               | 0.00000               |

## Sequence Summary Report

| Plate11 | 16S rDNA sequencing              | LCA as substrate        |                       | 3-OxoLCA as substrate |                       |
|---------|----------------------------------|-------------------------|-----------------------|-----------------------|-----------------------|
|         |                                  | 3-OxoLCA production (%) | isoLCA production (%) | LCA production (%)    | isoLCA production (%) |
| P11-A1  | <i>Peptoniphilus harei</i>       | 0.00000                 | 0.11066               | 3.66193               | 45.95645              |
| P11-A10 | <i>Collinsella intestinalis</i>  | 0.86539                 | 0.00000               | 42.50473              | 0.13183               |
| P11-A11 | <i>Collinsella intestinalis</i>  | 26.97747                | 0.00000               | 83.97298              | 0.23300               |
| P11-A12 | <i>Collinsella intestinalis</i>  | 46.30576                | 0.04713               | 78.00327              | 0.44037               |
| P11-A2  | <i>Peptoniphilus harei</i>       | 0.06262                 | 0.10561               | 3.09950               | 37.90957              |
| P11-A3  | <i>Collinsella intestinalis</i>  | 17.18537                | 0.06339               | 51.39268              | 0.00000               |
| P11-A4  | <i>Collinsella intestinalis</i>  | 0.09696                 | 0.16847               | 6.02485               | 0.00000               |
| P11-A5  | <i>Peptoniphilus harei</i>       | 0.00000                 | 0.12610               | 4.74418               | 32.36729              |
| P11-A6  | <i>Collinsella intestinalis</i>  | 9.60761                 | 0.22744               | 89.22872              | 0.32642               |
| P11-A7  | <i>Peptoniphilus harei</i>       | 0.10321                 | 0.29490               | 3.10186               | 39.14505              |
| P11-A8  | <i>Peptoniphilus harei</i>       | 0.22200                 | 0.41791               | 2.60061               | 50.62676              |
| P11-A9  | <i>Peptoniphilus harei</i>       | 0.00000                 | 0.10367               | 3.28555               | 42.01524              |
| P11-B1  | <i>Bacteroides vulgatus</i>      | 0.00000                 | 0.11906               | 0.31535               | 2.95486               |
| P11-B10 | <i>Peptoniphilus harei</i>       | 28.46166                | 2.75273               | 69.66825              | 21.85608              |
| P11-B11 | <i>Peptoniphilus harei</i>       | 0.07911                 | 0.00000               | 2.92147               | 42.12848              |
| P11-B12 | <i>Peptoniphilus harei</i>       | 0.00000                 | 0.14852               | 3.10709               | 41.23396              |
| P11-B2  | <i>Monoglobus pectinilyticus</i> | 4.09840                 | 0.00000               | 0.37248               | 0.00000               |
| P11-B3  | <i>Collinsella intestinalis</i>  | 42.75195                | 0.07456               | 78.54120              | 0.10154               |
| P11-B4  |                                  | 0.79552                 | 0.00000               | 0.10954               | 0.00000               |
| P11-B5  |                                  | 0.06712                 | 0.00000               | 0.00000               | 0.00000               |
| P11-B6  |                                  | 0.30473                 | 0.14799               | 0.00000               | 0.00000               |
| P11-B7  | <i>Peptoniphilus harei</i>       | 0.11328                 | 0.20032               | 3.13469               | 36.07062              |
| P11-B8  | <i>Collinsella intestinalis</i>  | 27.71460                | 0.08200               | 78.19122              | 0.00000               |
| P11-B9  | <i>Peptoniphilus harei</i>       | 0.13525                 | 0.43195               | 3.38364               | 41.91333              |
| P11-C1  | <i>Collinsella aerofaciens</i>   | 0.05841                 | 0.00000               | 91.66464              | 0.41719               |
| P11-C10 |                                  | 0.08099                 | 0.00000               | 0.17327               | 2.06836               |
| P11-C11 | <i>Monoglobus pectinilyticus</i> | 1.82339                 | 0.12305               | 0.20410               | 0.00000               |
| P11-C12 | <i>Peptoniphilus harei</i>       | 0.11067                 | 0.24922               | 2.11105               | 28.10889              |
| P11-C2  | <i>Collinsella intestinalis</i>  | 3.48402                 | 0.10618               | 35.66891              | 0.00000               |
| P11-C3  | <i>Peptoniphilus harei</i>       | 0.12280                 | 0.15244               | 2.97525               | 39.33789              |
| P11-C4  | <i>Monoglobus pectinilyticus</i> | 0.10822                 | 0.24221               | 1.27308               | 0.16743               |

## Sequence Summary Report

|         |                             |          |         |          |          |
|---------|-----------------------------|----------|---------|----------|----------|
| P11-C5  | Monoglobus pectinilyticus   | 1.19860  | 0.00000 | 0.31154  | 0.08835  |
| P11-C6  |                             | 0.00000  | 0.00000 | 0.00000  | 0.00000  |
| P11-C7  | Peptoniphilus harei         | 0.00000  | 0.00000 | 2.68781  | 34.09251 |
| P11-C8  | Adlercreutzia equolifaciens | 39.81859 | 0.19673 | 14.08318 | 0.00000  |
| P11-C9  | Collinsella intestinalis    | 13.59109 | 0.00000 | 72.37848 | 0.00000  |
| P11-D1  | Peptoniphilus harei         | 0.06340  | 0.10766 | 2.83116  | 44.82826 |
| P11-D10 | Collinsella intestinalis    | 43.42578 | 0.23388 | 66.25658 | 0.17113  |
| P11-D11 | Collinsella intestinalis    | 3.57592  | 0.00000 | 81.78846 | 0.00000  |
| P11-D12 |                             | 0.07987  | 0.00000 | 0.06574  | 0.00000  |
| P11-D2  | Collinsella intestinalis    | 8.15272  | 0.16623 | 79.53094 | 0.00000  |
| P11-D3  | Peptoniphilus harei         | 0.00000  | 0.15700 | 3.81178  | 48.91274 |
| P11-D4  | Peptoniphilus harei         | 0.27014  | 0.21548 | 3.09270  | 42.12123 |
| P11-D5  | Collinsella intestinalis    | 13.96320 | 0.07954 | 86.93987 | 0.00000  |
| P11-D6  |                             | 0.07203  | 0.13140 | 0.00000  | 0.00000  |
| P11-D7  | Collinsella aerofaciens     | 0.00000  | 0.00000 | 87.14289 | 0.00000  |
| P11-D8  | Monoglobus pectinilyticus   | 1.20169  | 0.10486 | 0.06072  | 0.00000  |
| P11-D9  | Collinsella intestinalis    | 5.64109  | 0.13079 | 85.44712 | 0.00000  |
| P11-E1  | Monoglobus pectinilyticus   | 3.17484  | 0.23541 | 0.08938  | 0.00000  |
| P11-E10 | Collinsella aerofaciens     | 0.11794  | 0.20400 | 94.28662 | 0.21217  |
| P11-E11 |                             | 0.24904  | 0.24776 | 0.07438  | 0.00000  |
| P11-E12 | Collinsella intestinalis    | 38.93470 | 0.07375 | 89.41156 | 0.25841  |
| P11-E2  |                             | 0.14723  | 0.00000 | 0.00000  | 0.00000  |
| P11-E3  |                             | 0.00000  | 0.00000 | 0.00000  | 0.00000  |
| P11-E4  | Peptoniphilus harei         | 1.22833  | 0.14916 | 3.19996  | 38.01712 |
| P11-E5  |                             | 0.19518  | 0.13251 | 0.25903  | 0.00000  |
| P11-E6  | Eggerthella lenta           | 61.51247 | 4.68565 | 44.52899 | 13.35614 |
| P11-E7  | Collinsella intestinalis    | 0.08293  | 0.08112 | 84.96732 | 0.00000  |
| P11-E8  | Monoglobus pectinilyticus   | 1.92583  | 0.00000 | 0.20726  | 0.00000  |
| P11-E9  | Peptoniphilus harei         | 0.09064  | 0.00000 | 2.91248  | 32.61786 |
| P11-F1  | Monoglobus pectinilyticus   | 3.48797  | 0.00000 | 0.16052  | 0.00000  |
| P11-F10 | Peptoniphilus harei         | 0.98483  | 0.00000 | 2.42459  | 33.55051 |
| P11-F11 | Collinsella intestinalis    | 19.95551 | 0.00000 | 91.59552 | 0.00000  |
| P11-F12 | Monoglobus pectinilyticus   | 2.36716  | 0.00000 | 1.61500  | 0.18970  |
| P11-F2  | Peptoniphilus harei         | 0.05987  | 0.00000 | 4.59756  | 48.34521 |
| P11-F3  | Peptoniphilus harei         | 0.00000  | 0.23510 | 2.92159  | 40.44338 |
| P11-F4  | Peptoniphilus harei         | 0.06379  | 0.00000 | 3.68128  | 46.00239 |
| P11-F5  |                             | 0.07273  | 0.00000 | 0.00000  | 0.00000  |

## Sequence Summary Report

|         |                           |          |         |          |          |
|---------|---------------------------|----------|---------|----------|----------|
| P11-F6  | Peptoniphilus harei       | 0.14416  | 0.00000 | 2.61786  | 29.49851 |
| P11-F7  | Peptoniphilus harei       | 0.00000  | 0.09166 | 4.16206  | 54.03078 |
| P11-F8  | Peptoniphilus harei       | 0.00000  | 0.11763 | 3.84235  | 43.52608 |
| P11-F9  | Peptoniphilus harei       | 0.13621  | 0.12565 | 3.17480  | 38.36444 |
| P11-G1  |                           | 0.21824  | 0.39175 | 0.00000  | 0.00000  |
| P11-G10 |                           | 0.07388  | 0.15293 | 0.69846  | 0.13031  |
| P11-G11 | Monoglobus pectinilyticus | 1.03655  | 0.00000 | 0.36070  | 0.00000  |
| P11-G12 | Collinsella aerofaciens   | 0.27244  | 0.15139 | 90.90176 | 0.27351  |
| P11-G2  | Peptoniphilus harei       | 0.06302  | 0.00000 | 3.34763  | 37.33372 |
| P11-G3  | Peptoniphilus harei       | 0.00000  | 0.13599 | 1.40228  | 37.46754 |
| P11-G4  | Collinsella intestinalis  | 19.45308 | 0.00000 | 83.18162 | 0.37567  |
| P11-G5  | Peptoniphilus harei       | 0.00000  | 0.00000 | 2.70056  | 38.32069 |
| P11-G6  |                           | 0.06538  | 0.00000 | 0.00000  | 0.00000  |
| P11-G7  |                           | 0.58927  | 0.00000 | 0.08500  | 0.00000  |
| P11-G8  |                           | 0.71497  | 0.14668 | 0.29177  | 0.00000  |
| P11-G9  |                           | 0.06738  | 0.45770 | 0.19571  | 3.77796  |
| P11-H1  | Collinsella aerofaciens   | 0.06181  | 0.12437 | 89.19152 | 0.23390  |
| P11-H10 | Collinsella intestinalis  | 12.48378 | 0.00000 | 89.60910 | 0.00000  |
| P11-H11 |                           | 0.98537  | 0.00000 | 0.88820  | 0.00000  |
| P11-H12 | Collinsella intestinalis  | 2.20309  | 0.19412 | 89.71500 | 0.00000  |
| P11-H2  | Peptoniphilus harei       | 0.00000  | 0.12022 | 4.13325  | 45.90040 |
| P11-H3  | Collinsella intestinalis  | 26.38131 | 0.03697 | 89.88760 | 0.09504  |
| P11-H4  |                           | 0.05660  | 0.23356 | 0.00000  | 0.00000  |
| P11-H5  | Peptoniphilus harei       | 0.23857  | 0.46837 | 2.85276  | 33.48213 |
| P11-H6  | Peptoniphilus harei       | 0.00000  | 0.16256 | 1.52549  | 36.50106 |
| P11-H7  | Collinsella aerofaciens   | 0.25774  | 0.00000 | 89.80009 | 0.59266  |
| P11-H8  |                           | 0.89396  | 0.18908 | 0.11399  | 0.00000  |
| P11-H9  | Peptoniphilus harei       | 0.00000  | 0.00000 | 3.89692  | 43.50304 |

Table S2 - biological triplicate tubes\_3-oxoLCA producers

| With 100uM LCA as substrate for 48hr |                                   | 3-oxoLCA % |            |            | isoLCA %   |            |            |
|--------------------------------------|-----------------------------------|------------|------------|------------|------------|------------|------------|
| Human isolates                       | 16S Sequencing hits               | Replicate1 | Replicate2 | Replicate3 | Replicate1 | Replicate2 | Replicate3 |
| P4-B10                               | Phoceia massiliensis              | 2.36       | 2.47       | 1.65       | 0.22       | 0.51       | 0.51       |
| P4-F8                                | Clostridium aldenense             | 0.84       | 1.39       | 1.63       | 5.10       | 3.84       | 3.76       |
| P4-G2                                | Ruminococcus gnavus               | 1.15       | 0.99       | 1.20       | 22.36      | 26.97      | 32.91      |
| P4-G5                                | Clostridium perfringens           | 6.05       | 7.17       | 6.61       | 0.21       | 0.35       | 0.18       |
| P7-A2                                | Raoultibacter massiliensis        | 47.37      | 41.59      | 44.49      | 0.00       | 0.00       | 0.00       |
| P7-E3                                | Gordonibacter pamelaee            | 65.42      | 69.60      | 69.47      | 6.44       | 4.73       | 5.25       |
| P7-G1                                | Collinsella intestinalis          | 5.12       | 4.26       | 4.49       | 0.00       | 0.00       | 0.00       |
| P7-G7                                | Eggerthella lenta                 | 62.89      | 62.41      | 62.20      | 6.13       | 6.41       | 6.04       |
| P8-B9                                | Monoglobus pectinilyticus         | 4.14       | 4.44       | 3.36       | 0.60       | 0.00       | 0.00       |
| P8-C12                               | Collinsella intestinalis          | 22.49      | 20.35      | 24.73      | 0.00       | 0.00       | 0.19       |
| P8-F11                               | Peptoniphilus harei               | 0.25       | 0.19       | 0.00       | 0.00       | 0.23       | 0.00       |
| P2-D12                               | Phoceia massiliensis              | 0.54       | 0.39       | 0.67       | 0.98       | 0.10       | 0.81       |
| P3-E2                                | Clostridium perfringens           | 3.27       | 4.38       | 4.41       | 0.00       | 0.23       | 0.20       |
| P5-A1                                | Collinsella aerofaciens           | 1.26       | 1.20       | 0.97       | 0.00       | 0.15       | 0.17       |
| P5-B9                                | Bifidobacterium longum            | 1.42       | 1.65       | 1.30       | 0.18       | 0.17       | 0.12       |
| P10-A9                               | Peptoniphilus harei               | 0.70       | 0.98       | 0.87       | 4.92       | 5.41       | 4.87       |
| P11-C8                               | Adlercreutzia equolifaciens       | 18.21      | 15.34      | 16.36      | 0.00       | 0.26       | 0.12       |
| P11-E6                               | Eggerthella lenta                 | 19.75      | 18.69      | 19.28      | 34.56      | 35.86      | 36.81      |
| P10-A9                               | Peptoniphilus harei               | 0.77       | 1.22       | 1.66       | 2.80       | 1.52       | 2.89       |
| P11-A12                              | Collinsella intestinalis          | 2.05       | 3.04       | 2.63       | 0.13       | 0.00       | 0.00       |
| P11-B10                              | Peptoniphilus harei               | 0.00       | 0.00       | 0.00       | 0.18       | 0.00       | 0.14       |
| P4-G12                               | Clostridium perfringens           | 2.03       | 1.42       | 1.56       | 1.03       | 0.00       | 0.00       |
| P8-C1                                | Monoglobus pectinilyticus         | 0.29       | 0.24       | 0.27       | 0.00       | 0.00       | 0.00       |
| P8-C10                               | Collinsella intestinalis          | 0.82       | 1.36       | 1.52       | 0.00       | 0.00       | 0.00       |
| P10-B8                               | Collinsella intestinalis          | 3.66       | 3.67       | 3.21       | 0.00       | 0.00       | 0.00       |
| P11-E4                               | Peptoniphilus harei               | 0.00       | 0.07       | 0.00       | 0.00       | 0.00       | 0.00       |
| P2-B6                                | Clostridium citroniae             | 3.75       | 3.70       | 3.58       | 9.50       | 7.53       | 8.96       |
| P3-G11                               | Clostridium perfringens           | 1.89       | 2.23       | 2.45       | 0.00       | 0.00       | 0.00       |
| P5-C2                                | Collinsella aerofaciens           | 1.40       | 1.35       | 1.05       | 2.00       | 2.84       | 2.17       |
| P5-E12                               | Bifidobacterium pseudocatenulatum | 0.00       | 0.11       | 0.00       | 0.00       | 0.00       | 0.00       |
| P5-G3                                | Bifidobacterium longum            | 1.82       | 1.91       | 1.62       | 0.21       | 0.03       | 0.10       |
| P5-G6                                | Bifidobacterium longum            | 1.27       | 1.61       | 1.32       | 0.34       | 0.00       | 0.33       |
| P7-G9                                | Eggerthella lenta                 | 26.68      | 26.46      | 25.06      | 2.79       | 2.93       | 2.62       |
| P8-F12                               | Collinsella intestinalis          | 4.60       | 4.55       | 4.10       | 0.00       | 0.00       | 0.00       |
| P4-B2                                | Clostridium aldenense             | 2.99       | 1.73       | 2.75       | 0.83       | 0.81       | 1.18       |





**Table S2 - biological triplicate tubes\_isoLCA producers (continued)**

| With 100uM 3-oxoLCA as substrate for 48hr |                              | LCA %      |            |            | isoLCA %   |            |            |
|-------------------------------------------|------------------------------|------------|------------|------------|------------|------------|------------|
| Human isolates                            | 16S Sequencing hits          | Replicate1 | Replicate2 | Replicate3 | Replicate1 | Replicate2 | Replicate3 |
| P9-D9                                     | Parabacteroides chongii      | 0.00       | 0.00       | 0.00       | 0.00       | 0.00       | 0.00       |
| P4-B2                                     | Clostridium aldenense        | 21.90      | 21.26      | 22.06      | 6.22       | 3.14       | 6.00       |
| P1-A10                                    | Bacteroides fragilis         | 1.03       | 0.88       | 0.88       | 31.45      | 30.82      | 30.50      |
| P4-G2                                     | Ruminococcus gnavus          | 70.76      | 70.49      | 68.18      | 27.76      | 27.87      | 30.32      |
| C.innocuum                                | Clostridium innocuum DSM1286 | 0.00       | 0.00       | 0.00       | 90.07      | 89.14      | 83.95      |

\*C.innocuum was predicted from bioinformatics listed in **Table S9** - Rumgna\_genes\_mgx

**Supplementary Table 3 | *Bacteroides fragilis* NCTC 9343 3 $\beta$ -HSDH homologs.** BLAST alignment of *B. fragilis* NCTC 9343 genome against known 3 $\beta$ -HSDHs Elen\_1325 and Rumgna\_00694.

| Insert name | <i>E.lenta</i> DSM2243 3 $\beta$ HSDH |          | <i>R.gnavus</i> ATCC29149 3 $\beta$ HSDH |          |
|-------------|---------------------------------------|----------|------------------------------------------|----------|
|             | Percent Identity (%)                  | E-value  | Percent Identity                         | E-value  |
| BF2144      | 37                                    | 4.00E-44 | 37                                       | 6.00E-50 |
| BF3932      | 35                                    | 2.00E-39 | 31                                       | 2.00E-35 |
| BF0083      | 33                                    | 7.00E-35 | 31                                       | 1.00E-31 |
| BF3320      | 31                                    | 5.00E-34 | 30                                       | 7.00E-31 |
| BF1060      | 32                                    | 2.00E-28 | 30                                       | 3.00E-16 |
| BF1669      | 31                                    | 3.00E-24 | 31                                       | 2.00E-21 |
| BF0143      | 25                                    | 7.00E-16 | 30                                       | 4.00E-34 |
| BF2136      | 26                                    | 8.00E-09 | -                                        | -        |
| BF3538      | 28                                    | 8.00E-08 | -                                        | -        |
| BF2931      | 25                                    | 8.00E-06 | 31                                       | 2.00E-06 |
| BF2345      | 27                                    | 1.00E-05 | 28                                       | 4.00E-07 |

Genome BLASTed *B. fragilis* NCTC 9343  
 Max e-value 1.00E-02  
 BLAST method protein vs. protein  
 MER-FS Assembled  
 expressed and tested

**Supplementary table 4 | 3 $\alpha$ /3 $\beta$ -HSDH homolog search in *E. lenta* isolates.** Presence / absence of Elen\_0360, Elen\_0690, and Elen\_1325 homologs across assayed strains. Locus tags and orthologous group IDs are as reported in ElenMatchR v1.0.9003<sup>60</sup>.

| Strain Name                       | Strain Collection IDs                      | OG_ID30_COV50_2004 (Elen_0360)       | 3 $\alpha$ -hydroxysteroid dehydrogenase | 3 $\beta$ -hydroxysteroid dehydrogenase |
|-----------------------------------|--------------------------------------------|--------------------------------------|------------------------------------------|-----------------------------------------|
| Eggerthella lenta 11C             | DSM110905                                  | Eggerthella_lenta_11C_00554          | Eggerthella_lenta_11C_02552              | Eggerthella_lenta_11C_00083             |
| Eggerthella lenta 14A             | DSM110907                                  | Eggerthella_lenta_14A_00561          | Eggerthella_lenta_14A_02867              | Eggerthella_lenta_14A_00168             |
| Eggerthella lenta 22C             | DSM110908                                  | Eggerthella_lenta_22C_01352          | Eggerthella_lenta_22C_00285              | Eggerthella_lenta_22C_00914             |
| Eggerthella lenta 28B             | DSM110909                                  | Eggerthella_lenta_28B_02480          | Not found                                | Eggerthella_lenta_28B_00228             |
| Eggerthella lenta A2              | DSM110911                                  | Eggerthella_lenta_A2_00417           | Eggerthella_lenta_A2_00758               | Homolog is split across contigs         |
| Eggerthella lenta DSM 11767       | DSM11767                                   | Eggerthella_lenta_DSM11767_02725     | Eggerthella_lenta_DSM11767_02379         | Eggerthella_lenta_DSM11767_00025        |
| Eggerthella lenta DSM 11863       | DSM11863                                   | Eggerthella_lenta_DSM11863_01062     | Eggerthella_lenta_DSM11863_00011         | Eggerthella_lenta_DSM11863_00792        |
| Eggerthella lenta DSM 15644       | DSM15644,ATCC4305,CCUG34779,CIP104211      | Eggerthella_lenta_DSM15644_01907     | Not found                                | Eggerthella_lenta_DSM15644_00171        |
| Eggerthella lenta DSM 2243        | DSM2243,ATC25559,JCM9979,NCTC11813,VPI0255 | Eggerthella_lenta_DSM2243REF_00373   | Eggerthella_lenta_DSM2243REF_00704       | Eggerthella_lenta_DSM2243REF_01345      |
| Eggerthella lenta FAA 1-1-60AUCSF | DSM110904                                  | Eggerthella_lenta_1160AFAAUCSF_01952 | Eggerthella_lenta_1160AFAAUCSF_01137     | Eggerthella_lenta_1160AFAAUCSF_00507    |
| Eggerthella lenta FAA 1-3-56      | DSM110906                                  | Eggerthella_lenta_1356FAA_01826      | Eggerthella_lenta_1356FAA_02297          | Eggerthella_lenta_1356FAA_00478         |
| Eggerthella lenta Valencia        |                                            | Eggerthella_lenta_Valencia_02042     | Not found                                | Eggerthella_lenta_Valencia_00149        |
| Eggerthella sinensis DSM 16107    | DSM16107,LMG22123                          | Eggerthella_sinensis_DSM16107_00168  | Eggerthella_sinensis_DSM16107_03005      | Eggerthella_sinensis_DSM16107_00947     |
| Gordonibacter pamelaeeae 3C       | DSM110924                                  | Not found                            | Gordonibacter_pamelaeeae_3C_01808        | Gordonibacter_pamelaeeae_3C_02959       |
| Gordonibacter species 28C         | DSM110925                                  | Not found                            | Gordonibacter_species_28C_02314          | Gordonibacter_species_28C_01887         |

**Supplementary table 5 | 3 $\alpha$ /3 $\beta$ -HSDH homolog search in *R. gnavus* isolates.** Presence/ absence of Rumgna\_02133 (3 $\alpha$ -HSDH) and Rumgna\_00694 (3 $\beta$ -HSDH) homologs across the assayed strains.

|                                  |                           | <b>3<math>\alpha</math>-hydroxysteroid dehydrogenase</b> | <b>3<math>\beta</math>-hydroxysteroid dehydrogenase</b> |
|----------------------------------|---------------------------|----------------------------------------------------------|---------------------------------------------------------|
| <b>Strain_Name</b>               | <b>Assembly accession</b> | <b>Locus_tag (Rumgna_02133)</b>                          | <b>Locus_tag (Rumgna_00694)</b>                         |
| [Ruminococcus] gnavus ATCC 35913 | GCF_900036035.1           | RGNV35913_RS16940                                        | RGNV35913_RS11310                                       |
| [Ruminococcus] gnavus ATCC 29149 | GCF_000169475.1           | RUMGNA_02133                                             | RUMGNA_00694                                            |
| [Ruminococcus] gnavus RJX1118    | GCF_002865485.1           | Not found                                                | CDL18_06235                                             |
| [Ruminococcus] gnavus RJX1119    | GCF_002865435.1           | Not found                                                | CDL22_07295                                             |
| [Ruminococcus] gnavus RJX1120    | GCF_002865405.1           | CDL27_01435                                              | CDL27_13985                                             |
| [Ruminococcus] gnavus RJX1121    | GCF_002865465.1           | CDL19_03820                                              | CDL19_11930                                             |
| [Ruminococcus] gnavus RJX1122    | GCF_002865425.1           | CCY17_11070                                              | CCY17_10550                                             |
| [Ruminococcus] gnavus RJX1123    | GCF_002865355.1           | CDL25_02830                                              | CDL25_09750                                             |
| [Ruminococcus] gnavus RJX1124    | GCF_002865325.1           | Not found                                                | CDL26_08635                                             |
| [Ruminococcus] gnavus RJX1125    | GCF_002865345.1           | Not found                                                | CDL23_04745                                             |
| [Ruminococcus] gnavus RJX1126    | GCF_002865305.1           | Not found                                                | CDL24_05470                                             |
| [Ruminococcus] gnavus RJX1127    | GCF_002865385.1           | CDL21_08955                                              | CDL21_06950                                             |
| [Ruminococcus] gnavus RJX1128    | GCF_002865285.1           | Not found                                                | CDL20_14335                                             |

**Supplementary Table 6 | Statistical analysis of metabolite differential abundance in the PRISM and HMP2 cohorts based on linear mixed effects models.** Nominal p-values were corrected for multiple hypothesis testing using the Benjamini-Hochberg FDR method (yielding adjusted q-values).

**- PRISM**

| Compound                  | Compound ID          | HMDB.ID   | Metabolite                                         | prevalence  | RT    | m.z      | coefCD       | coefUC       | tvalCD       | tvalUC       | pvalCD      | pvalUC      | qvalCD      | qvalUC      |
|---------------------------|----------------------|-----------|----------------------------------------------------|-------------|-------|----------|--------------|--------------|--------------|--------------|-------------|-------------|-------------|-------------|
| 12.63_373.2744m/z_C18-neg | C18-neg_Cluster_0722 |           | 3-oxolithocholic acid                              | 0.831168831 | 12.63 | 373.2744 | -3.051117574 | -1.817156482 | -2.722486426 | -1.524136827 | 0.007297556 | 0.129714323 | 0.039196199 | 0.295497187 |
| 11.73_375.2901m/z_C18-neg | C18-neg_Cluster_0733 |           | isolithocholic acid                                | 0.785714286 | 11.73 | 375.2901 | -2.666696574 | -2.072739042 | -2.407205363 | -1.758769868 | 0.017369009 | 0.080785981 | 0.070958679 | 0.226126972 |
| 12.42_375.2898m/z_C18-neg | C18-neg_Cluster_0731 | HMDB00761 | lithocholate                                       | 1           | 12.42 | 375.2898 | -2.018168128 | -1.178904823 | -2.638771939 | -1.448932346 | 0.009256365 | 0.149576805 | 0.045924789 | 0.321180272 |
| 10.89_432.3114m/z_C18-neg | C18-neg_Cluster_1081 | HMDB00698 | glycolithocholate                                  | 0.967532468 | 10.89 | 432.3114 | -2.438842055 | -1.60607758  | -2.811996622 | -1.740694225 | 0.005625708 | 0.083918663 | 0.032839297 | 0.231100616 |
| 9.51_448.3066m/z_C18-neg  | C18-neg_Cluster_1196 | HMDB00631 | glycodeoxycholate                                  | 0.974025974 | 9.51  | 448.3066 | -1.518289268 | -0.267304493 | -1.67078337  | -0.276501015 | 0.096982683 | 0.782568173 | 0.226814835 | 0.870923553 |
| 10.76_391.2852m/z_C18-neg | C18-neg_Cluster_0833 | HMDB00626 | deoxycholate                                       | 1           | 10.76 | 391.2852 | -1.373244369 | -0.714923024 | -2.026957613 | -0.991929881 | 0.044551549 | 0.322930926 | 0.134608138 | 0.508429502 |
| 8.54_498.2893m/z_C18-neg  | C18-neg_Cluster_1575 | HMDB00896 | taurodeoxycholate                                  | 0.993506494 | 8.54  | 498.2893 | -0.321925722 | -0.080687537 | -0.339763864 | -0.08004843  | 0.734539945 | 0.936312241 | 0.841569358 | 0.964156984 |
| 9.23_391.2850m/z_C18-neg  | C18-neg_Cluster_0830 | HMDB00733 | hyodeoxycholate/ursodeoxycholate                   | 1           | 9.23  | 391.285  | -0.198749585 | -0.582990758 | -0.305481759 | -0.842297618 | 0.760449778 | 0.401047815 | 0.859151544 | 0.582609837 |
| 9.70_482.2939m/z_C18-neg  | C18-neg_Cluster_1465 | HMDB00722 | taurolithocholate                                  | 0.941558442 | 9.7   | 482.2939 | 0.234693469  | 0.917648263  | 0.215130141  | 0.790681092  | 0.829976711 | 0.430458006 | 0.902423    | 0.608449872 |
| 8.08_448.3067m/z_C18-neg  | C18-neg_Cluster_1197 | HMDB00708 | glycoursodeoxycholate                              | 0.948051948 | 8.08  | 448.3067 | 0.173135415  | 0.282975358  | 0.144345529  | 0.22176392   | 0.885433739 | 0.824818531 | 0.93583355  | 0.89804924  |
| 8.29_498.2890m/z_C18-neg  | C18-neg_Cluster_1574 | HMDB00951 | taurochenodeoxycholate                             | 0.974025974 | 8.29  | 498.289  | 1.105655356  | 0.630752329  | 1.191988784  | 0.639199029  | 0.235267983 | 0.523730529 | 0.410622957 | 0.684716258 |
| 9.26_448.3065m/z_C18-neg  |                      | HMDB00637 | glycochenodeoxycholate                             | 1           | 9.26  | 448.3065 | 1.057801547  | 0.425824501  | 1.439857395  | 0.544842252  | 0.152124317 | 0.586722736 | 0.307469784 | 0.733768617 |
| 8.12_464.3014m/z_C18-neg  |                      | HMDB00138 | glycocholate                                       | 1           | 8.12  | 464.3014 | 1.157067104  | 0.465029948  | 1.373601015  | 0.518928864  | 0.171745595 | 0.604623864 | 0.333592809 | 0.746416383 |
| 10.55_391.2848m/z_C18-neg | C18-neg_Cluster_0832 | HMDB00518 | chenodeoxycholate                                  | 1           | 10.55 | 391.2848 | 1.631078758  | 0.555210458  | 3.455744913  | 1.105730356  | 0.000725405 | 0.270726338 | 0.008162944 | 0.455712149 |
| 7.38_514.2839m/z_C18-neg  |                      | HMDB00036 | taurocholate                                       | 1           | 7.38  | 514.2839 | 1.941784942  | 0.947324535  | 2.025610707  | 0.928920378  | 0.044691327 | 0.354517876 | 0.134849206 | 0.540051832 |
| 8.10_407.2800m/z_C18-neg  | C18-neg_Cluster_0927 | HMDB00506 | alpha-muricholate                                  | 0.993506494 | 8.1   | 407.28   | 2.187165151  | 0.808464858  | 2.402343564  | 0.834717533  | 0.01759214  | 0.405288812 | 0.071594497 | 0.585766293 |
| 8.33_405.2643m/z_C18-neg  | C18-neg_Cluster_0900 | HMDB00391 | ketodeoxycholate                                   | 0.993506494 | 8.33  | 405.2643 | 2.371379351  | 0.893146022  | 2.900632585  | 1.026925659  | 0.004321786 | 0.306213958 | 0.027346976 | 0.49187273  |
| 9.11_407.2799m/z_C18-neg  | C18-neg_Cluster_0930 | HMDB00619 | cholate                                            | 1           | 9.11  | 407.2799 | 2.30877639   | 0.867590157  | 3.963581926  | 1.400056081  | 0.000116869 | 0.163693041 | 0.002283773 | 0.337880822 |
| 7.26_498.2898m/z_C18-neg  | C18-neg_Cluster_1576 | HMDB00874 | taurohyodeoxycholic acid/tauroursodeoxycholic acid | 0.792207792 | 7.26  | 498.2898 | 4.603187682  | 2.124010486  | 2.924937788  | 1.268643086  | 0.004016146 | 0.206658841 | 0.026045119 | 0.387456826 |
| 9.72_391.2852m/z_C18-neg  | C18-neg_Cluster_0831 |           | isodeoxycholic acid                                | 1           | 9.72  | 391.2852 | -1.022070144 | -0.891097641 | -1.49746267  | -1.227228539 | 0.136508192 | 0.221781788 | 0.285791388 | 0.404565656 |
| 10.72_389.2697m/z_C18-neg | C18-neg_Cluster_0818 |           | 3-oxodeoxycholic acid                              | 0.993506494 | 10.72 | 389.2697 | -0.80866379  | -0.868133869 | -1.29059009  | -1.302362488 | 0.198958117 | 0.194915806 | 0.368284884 | 0.374710369 |

Table S6 - HMP2

| Compound     | HMDB ID   | Metabolite                                     | RT    | m.z      | prevalence  | coefActiveNonIBD | coefActiveCD | coefActiveUC | tvalActiveNonIBD | tvalActiveCD | tvalActiveUC | pvalActiveNonIBD | pvalActiveCD | pvalActiveUC | qvalActiveNonIBD | qvalActiveCD | qvalActiveUC |
|--------------|-----------|------------------------------------------------|-------|----------|-------------|------------------|--------------|--------------|------------------|--------------|--------------|------------------|--------------|--------------|------------------|--------------|--------------|
| C18n_QI6169  |           | 3-oxolithocholic acid                          | 12.2  | 373.2749 | 0.97985348  | -0.60744546      | -2.086262023 | -2.482534657 | -0.774345658     | -4.035855028 | -2.912574823 | 0.439252173      | 6.69E-05     | 0.003816046  | 0.816430442      | 0.00180551   | 0.316071164  |
| C18n_QI13593 |           | isoallo-lithocholic acid                       | 11.15 | 751.5889 | 0.509157509 | -3.136617214     | -2.793226081 | -2.807499558 | -2.214795882     | -2.962169115 | -1.824036278 | 0.02742134       | 0.00326481   | 0.069004054  | 0.331568822      | 0.028381117  | 0.668512129  |
| C18n_QI6230  |           | isolithocholic acid                            | 11.31 | 375.2906 | 0.998168498 | -0.621043597     | -1.944397702 | -2.175999246 | -0.99048648      | -4.629538746 | -3.1925764   | 0.322624575      | 5.18E-06     | 0.001538654  | 0.749582339      | 0.000278217  | 0.251447275  |
| C18n_QI48    | HMDB00761 | lithocholate                                   | 11.98 | 375.2905 | 1           | -0.572602791     | -1.750705103 | -1.789450074 | -1.066461615     | -4.856683353 | -3.065712017 | 0.286954329      | 1.81E-06     | 0.002341326  | 0.722670778      | 0.000127584  | 0.271011442  |
| C18n_QI55    | HMDB00698 | glycolithocholate                              | 10.45 | 432.3119 | 1           | -0.558529916     | -1.102496943 | -1.624733916 | -0.096732885     | -3.258664169 | -2.935665726 | 0.273516514      | 0.001229738  | 0.003549607  | 0.712486372      | 0.014567985  | 0.312254274  |
| C18n_QI57    | HMDB00631 | glycodeoxycholate                              | 9.08  | 448.3074 | 1           | -0.548016241     | -0.987318352 | -0.984076359 | -0.964145592     | -2.699955306 | -1.593606222 | 0.335642431      | 0.007273654  | 0.111932075  | 0.756770115      | 0.049434961  | 0.735124874  |
| C18n_QI50    | HMDB00626 | deoxycholate                                   | 10.32 | 391.2857 | 1           | -0.22194394      | -1.045715993 | -1.54579115  | -0.499189364     | -3.544349631 | -3.199309747 | 0.617961408      | 0.000447335  | 0.001504175  | 0.894519868      | 0.007198192  | 0.250067094  |
| C18n_QI62    | HMDB00896 | taurodeoxycholate                              | 8.39  | 498.29   | 1           | -0.876820603     | -0.624932091 | -1.259852008 | -1.22632091      | -1.341151152 | -1.621924115 | 0.220907061      | 0.180746031  | 0.105725193  | 0.6659701        | 0.39271489   | 0.727955971  |
| C18n_QI51    | HMDB00733 | hyodeoxycholate/ursodeoxycholate               | 8.85  | 391.2855 | 0.998168498 | 0.611562243      | 0.157177606  | 0.531396148  | 1.484723235      | 0.579827832  | 1.187375523  | 0.138522375      | 0.562405922  | 0.235889367  | 0.579186679      | 0.754495436  | 0.824660967  |
| C18n_QI60    | HMDB00722 | tauroolithocholate                             | 9.65  | 482.295  | 1           | -0.825346749     | -0.626933991 | -1.316810359 | -1.396949278     | -1.601950911 | -2.051026051 | 0.163318971      | 0.110073749  | 0.041012761  | 0.609225428      | 0.292026026  | 0.592096945  |
| C18n_QI58    | HMDB00708 | glycoursodeoxycholate                          | 7.69  | 448.3071 | 0.994505495 | 0.590763639      | 1.387065804  | 1.587552352  | 0.872495392      | 3.163432312  | 2.158245667  | 0.38353977       | 0.001696487  | 0.031592219  | 0.785633186      | 0.018226509  | 0.553826924  |
| C18n_QI61    | HMDB00951 | taurochenodeoxycholate                         | 8.12  | 498.2899 | 1           | 0.534155705      | 1.946317678  | 1.241317222  | 0.774035779      | 4.390797929  | 1.655654372  | 0.439435154      | 1.50E-05     | 0.098693263  | 0.816511526      | 0.000602642  | 0.716717188  |
| C18n_QI56    | HMDB00637 | glycochenodeoxycholate                         | 8.84  | 448.307  | 1           | 0.77033984       | 1.325585229  | 0.591029322  | 1.46272214       | 3.912140276  | 1.032979755  | 0.144445953      | 0.000110023  | 0.302330701  | 0.586076488      | 0.002596692  | 0.855063823  |
| C18n_QI59    | HMDB00138 | glycocholate                                   | 7.74  | 464.3021 | 1           | 0.226444234      | 1.536269431  | 1.014019547  | 0.382731019      | 4.008241791  | 1.577620284  | 0.702152869      | 7.49E-05     | 0.115561416  | 0.924570504      | 0.001957851  | 0.737744449  |
| C18n_QI49    | HMDB00518 | chenodeoxycholate                              | 10.12 | 391.2855 | 1           | 0.337056263      | 1.477807615  | 1.287355322  | 0.775761907      | 5.159392781  | 2.726936454  | 0.438416448      | 4.17E-07     | 0.006716349  | 0.815984292      | 4.21E-05     | 0.381383737  |
| C18n_QI65    | HMDB00036 | taurocholate                                   | 7.18  | 514.2845 | 1           | 0.245060491      | 2.017327474  | 1.487859607  | 0.366253375      | 4.624465983  | 2.046853405  | 0.714398577      | 5.30E-06     | 0.041423224  | 0.928726976      | 0.000282505  | 0.594363113  |
| C18n_QI53    | HMDB00506 | alpha-muricholate                              | 7.74  | 407.2804 | 0.996336996 | 1.494679417      | 1.207564188  | 1.372751672  | 2.482738741      | 3.031087096  | 2.0984038    | 0.013508416      | 0.002619327  | 0.036589923  | 0.266327585      | 0.024364032  | 0.575925564  |
| C18n_QI52    | HMDB00391 | ketodeoxycholate                               | 7.97  | 405.2648 | 1           | 0.971201619      | 1.763261605  | 1.623888453  | 1.796157506      | 4.940754434  | 2.763956034  | 0.073336715      | 1.21E-06     | 0.006014417  | 0.469223823      | 9.51E-05     | 0.366183288  |
| C18n_QI54    | HMDB00619 | chololate                                      | 8.73  | 407.2804 | 1           | 0.444236712      | 1.676168032  | 1.488917799  | 0.94303391       | 5.387931327  | 2.908828363  | 0.346317773      | 1.32E-07     | 0.003860957  | 0.763641529      | 1.80E-05     | 0.317225696  |
| C18n_QI63    | HMDB00874 | taurohyodeoxycholate/tauroursodeoxycholate     | 7.06  | 498.29   | 1           | -0.101610082     | 1.551583707  | 1.265646526  | -0.172858466     | 4.007115884  | 1.981634945  | 0.862863171      | 7.52E-05     | 0.048306649  | 0.97018839       | 0.00196508   | 0.61401926   |
| C18n_QI64    | HMDB00932 | tauro-alpha-muricholate/tauro-beta-muricholate | 6.15  | 514.2844 | 0.95970696  | 0.546420194      | 2.563750376  | 2.321012033  | 0.495781415      | 3.49985466   | 1.937783584  | 0.620361586      | 0.000526015  | 0.053458322  | 0.895106098      | 0.00805811   | 0.629342019  |
| C18n_QI6769  |           | isodeoxycholic acid                            | 9.31  | 391.2858 | 1           | 0.025287813      | -0.879409103 | -1.130266744 | 0.060391028      | -3.20380616  | -2.484472406 | 0.95187887       | 0.00148155   | 0.013443986  | 0.991905926      | 0.016592322  | 0.451248618  |
| C18n_QI6700  |           | 3-oxodeoxycholic acid                          | 10.28 | 389.2703 | 1           | 0.129492557      | 0.314102878  | -0.642858366 | 0.37122224       | 1.363903475  | -1.69606246  | 0.173479459      | 0.090768368  | 0.927365458  | 0.383159277      | 0.705949302  |              |

**Supplementary Table 7 | TH17/IL-17a-related genes used in this study.** We collected TH17/IL-17 $\alpha$ -related genes including a group of genes enriched in the IL-17 signaling pathway<sup>6</sup> and another group of TH17 signature genes found by Revu et al<sup>7</sup>.

| gene   | host  | reference |
|--------|-------|-----------|
| CCL2   | Human | [61]      |
| CCL11  | Human | [61]      |
| CCL20  | Human | [61]      |
| CXCL1  | Human | [61]      |
| CXCL2  | Human | [61]      |
| CXCL3  | Human | [61]      |
| CXCL5  | Human | [61]      |
| CXCL6  | Human | [61]      |
| CXCL10 | Human | [61]      |
| DEFB4A | Human | [61]      |
| IFNG   | Human | [61]      |
| IL1B   | Human | [61]      |
| IL6    | Human | [61]      |
| IL17A  | Human | [61]      |
| LCN2   | Human | [61]      |
| MMP1   | Human | [61]      |
| MMP3   | Human | [61]      |
| MMP9   | Human | [61]      |
| MMP13  | Human | [61]      |
| MUC5AC | Human | [61]      |
| TNF    | Human | [61]      |
| RORC   | Human | [62]      |
| IL17A  | Human | [62]      |
| IL17F  | Human | [62]      |
| IL26   | Human | [62]      |
| GZMA   | Human | [62]      |
| GZMB   | Human | [62]      |
| CXCL13 | Human | [62]      |
| CCR6   | Human | [62]      |
| IL23R  | Human | [62]      |
| IL1R1  | Human | [62]      |
| IL6R   | Human | [62]      |
| IL6ST  | Human | [62]      |
| TCF7   | Human | [62]      |
| LEF1   | Human | [62]      |
| BATF   | Human | [62]      |
| MAF    | Human | [62]      |
| JUN    | Human | [62]      |
| JUNB   | Human | [62]      |
| JUND   | Human | [62]      |
| FOS    | Human | [62]      |

**Table S7 (continued)**

|        |       |      |
|--------|-------|------|
| FOSL2  | Human | [62] |
| BCL-XL | Human | [62] |
| BCL6   | Human | [62] |
| IL2    | Human | [62] |
| IL2RA  | Human | [62] |
| OSM    | Human | [62] |
| SOCS3  | Human | [62] |
| GFI1   | Human | [62] |
| FOXP3  | Human | [62] |
| CTLA4  | Human | [62] |
| LAG3   | Human | [62] |
| PD1    | Human | [62] |
| IL21   | Human | [62] |
| CXCR5  | Human | [62] |
| ICOS   | Human | [62] |
| IL22   | Human | [62] |



**Supplementary Table 8 | Differential expression modeling of TH17/IL-17 $\alpha$ -related genes in HMP2.** Table fields indicate 1) gene name; 2) condition (i.e. CD:Non-IBD and UC:Non-IBD); 3) effect size estimated from the linear model's diagnosis coefficient; 4) nominal p-values from the linear models (**Methods**); 5) adjusted p-values based on the Benjamini-Hochberg procedure with target false discovery rate (FDR) of 0.25.

| gene   | condition    | *effect size | p-value    | q-value    |
|--------|--------------|--------------|------------|------------|
| BATF   | CD_vs_nonIBD | 0.66565954   | 0.0832764  | 0.3825344  |
| BATF   | UC_vs_nonIBD | 0.47592211   | 0.25372625 | 0.75758555 |
| BCL6   | CD_vs_nonIBD | 0.2382921    | 0.42731984 | 0.75283582 |
| BCL6   | UC_vs_nonIBD | -0.0618586   | 0.84998722 | 0.96238886 |
| CCL11  | CD_vs_nonIBD | 1.61334959   | 0.0049228  | 0.1225743  |
| CCL11  | UC_vs_nonIBD | 2.16071217   | 0.00067176 | 0.544394   |
| CCL2   | CD_vs_nonIBD | 1.14045415   | 0.00146368 | 0.07581674 |
| CCL2   | UC_vs_nonIBD | 0.69496116   | 0.06839691 | 0.67073598 |
| CCL20  | CD_vs_nonIBD | 1.25406623   | 0.02053657 | 0.21877253 |
| CCL20  | UC_vs_nonIBD | 0.22469294   | 0.69826699 | 0.91934478 |
| CCR6   | CD_vs_nonIBD | 0.58705187   | 0.22486062 | 0.58186804 |
| CCR6   | UC_vs_nonIBD | 0.56940436   | 0.28042483 | 0.76823466 |
| CTLA4  | CD_vs_nonIBD | 0.92062258   | 0.05297442 | 0.31656802 |
| CTLA4  | UC_vs_nonIBD | 0.72813153   | 0.15824584 | 0.71702747 |
| CXCL1  | CD_vs_nonIBD | 2.59536684   | 6.60E-05   | 0.0249417  |
| CXCL1  | UC_vs_nonIBD | 1.31474778   | 0.05240926 | 0.66118259 |
| CXCL10 | CD_vs_nonIBD | 2.11897054   | 6.72E-05   | 0.0249417  |
| CXCL10 | UC_vs_nonIBD | 0.44831128   | 0.41297844 | 0.82083204 |
| CXCL13 | CD_vs_nonIBD | -0.7948318   | 0.42144955 | 0.74813925 |
| CXCL13 | UC_vs_nonIBD | -0.727229    | 0.50024863 | 0.85092407 |
| CXCL2  | CD_vs_nonIBD | 1.97153759   | 0.00164748 | 0.07966999 |
| CXCL2  | UC_vs_nonIBD | 0.46483351   | 0.48121401 | 0.84327297 |
| CXCL3  | CD_vs_nonIBD | 2.01392878   | 0.00251582 | 0.09752794 |
| CXCL3  | UC_vs_nonIBD | 0.78341499   | 0.26733981 | 0.76421472 |
| CXCL5  | CD_vs_nonIBD | 3.50329909   | 7.12E-05   | 0.0249417  |
| CXCL5  | UC_vs_nonIBD | 1.8847253    | 0.04072925 | 0.64174526 |
| CXCL6  | CD_vs_nonIBD | 2.44953922   | 2.03E-05   | 0.01542235 |
| CXCL6  | UC_vs_nonIBD | 1.39610444   | 0.0194653  | 0.61892197 |
| CXCR5  | CD_vs_nonIBD | -0.5195156   | 0.48335088 | 0.78780195 |
| CXCR5  | UC_vs_nonIBD | -0.3038025   | 0.70701093 | 0.92221105 |
| DEFB4A | CD_vs_nonIBD | 2.49965596   | 0.0101783  | 0.16390778 |
| DEFB4A | UC_vs_nonIBD | 1.63524631   | 0.11780651 | 0.69451674 |
| FOS    | CD_vs_nonIBD | 0.30656161   | 0.47545646 | 0.7834018  |
| FOS    | UC_vs_nonIBD | 0.28562745   | 0.54236613 | 0.86507241 |
| FOSL2  | CD_vs_nonIBD | 0.03764232   | 0.74903629 | 0.91611769 |
| FOSL2  | UC_vs_nonIBD | -0.1049566   | 0.41497136 | 0.82126252 |
| FOXP3  | CD_vs_nonIBD | 0.88351876   | 0.04632224 | 0.30033775 |
| FOXP3  | UC_vs_nonIBD | 0.7314862    | 0.12845262 | 0.70114245 |
| GF11   | CD_vs_nonIBD | -0.0469246   | 0.64657473 | 0.8736897  |
| GF11   | UC_vs_nonIBD | 0.04423487   | 0.69215384 | 0.91742631 |
| GZMA   | CD_vs_nonIBD | 0.41631414   | 0.14528505 | 0.48601648 |

Table S8 (continued)

|       |              |            |            |            |
|-------|--------------|------------|------------|------------|
| GZMA  | UC_vs_nonIBD | 0.24585154 | 0.42830192 | 0.82734642 |
| GZMB  | CD_vs_nonIBD | 2.0712882  | 1.45E-05   | 0.0138762  |
| GZMB  | UC_vs_nonIBD | 0.96043774 | 0.05101453 | 0.65633306 |
| ICOS  | CD_vs_nonIBD | 0.67927459 | 0.07568473 | 0.36633229 |
| ICOS  | UC_vs_nonIBD | 0.68415145 | 0.10073633 | 0.6926757  |
| IFNG  | CD_vs_nonIBD | 2.14467674 | 0.00021539 | 0.03418664 |
| IFNG  | UC_vs_nonIBD | 1.35779491 | 0.02649308 | 0.62423699 |
| IL17A | CD_vs_nonIBD | 2.5119816  | 0.00024102 | 0.03617232 |
| IL17A | UC_vs_nonIBD | 1.31400284 | 0.06745852 | 0.66897715 |
| IL17F | CD_vs_nonIBD | 1.5004707  | 0.00773224 | 0.14643648 |
| IL17F | UC_vs_nonIBD | 0.27859696 | 0.64202275 | 0.90085366 |
| IL1B  | CD_vs_nonIBD | 2.43670028 | 6.88E-05   | 0.0249417  |
| IL1B  | UC_vs_nonIBD | 0.73837514 | 0.2429393  | 0.75120037 |
| IL1R1 | CD_vs_nonIBD | 0.64263058 | 0.00982924 | 0.16230729 |
| IL1R1 | UC_vs_nonIBD | 0.48776957 | 0.06910566 | 0.67133823 |
| IL2   | CD_vs_nonIBD | 0.38557979 | 0.33467547 | 0.68342041 |
| IL2   | UC_vs_nonIBD | 0.39172329 | 0.36917548 | 0.80287802 |
| IL21  | CD_vs_nonIBD | 0.41709149 | 0.50180211 | 0.79823766 |
| IL21  | UC_vs_nonIBD | 0.55030783 | 0.4173966  | 0.82217495 |
| IL22  | CD_vs_nonIBD | 2.49564249 | 0.00015701 | 0.03033808 |
| IL22  | UC_vs_nonIBD | 0.91028228 | 0.18528717 | 0.73205688 |
| IL23R | CD_vs_nonIBD | -0.0800676 | 0.69881493 | 0.89620542 |
| IL23R | UC_vs_nonIBD | -0.2096058 | 0.35487654 | 0.80015574 |
| IL26  | CD_vs_nonIBD | 2.32519973 | 2.82E-05   | 0.01684496 |
| IL26  | UC_vs_nonIBD | 1.52221211 | 0.0088761  | 0.59963935 |
| IL2RA | CD_vs_nonIBD | 1.13797108 | 0.00686762 | 0.13905217 |
| IL2RA | UC_vs_nonIBD | 0.77523553 | 0.0863925  | 0.68533727 |
| IL6   | CD_vs_nonIBD | 1.92724443 | 0.00254056 | 0.09752794 |
| IL6   | UC_vs_nonIBD | 0.35941129 | 0.59396285 | 0.88580386 |
| IL6R  | CD_vs_nonIBD | -0.1221817 | 0.33898405 | 0.68657973 |
| IL6R  | UC_vs_nonIBD | -0.2360782 | 0.0929874  | 0.68618118 |
| IL6ST | CD_vs_nonIBD | 0.25539572 | 0.08590989 | 0.38841833 |
| IL6ST | UC_vs_nonIBD | 0.25076081 | 0.12174327 | 0.69451674 |
| JUN   | CD_vs_nonIBD | -0.3127255 | 0.12800662 | 0.45920034 |
| JUN   | UC_vs_nonIBD | -0.4123252 | 0.06715476 | 0.66897715 |
| JUNB  | CD_vs_nonIBD | 0.142444   | 0.624793   | 0.86285372 |
| JUNB  | UC_vs_nonIBD | -0.1910048 | 0.54829593 | 0.86708588 |
| JUND  | CD_vs_nonIBD | -0.1804596 | 0.26474693 | 0.62220295 |
| JUND  | UC_vs_nonIBD | -0.0224416 | 0.89846453 | 0.97534441 |
| LAG3  | CD_vs_nonIBD | 0.75072333 | 0.00353271 | 0.11068579 |
| LAG3  | UC_vs_nonIBD | 0.84006144 | 0.00283684 | 0.58005734 |
| LCN2  | CD_vs_nonIBD | 1.99882921 | 0.00621587 | 0.13483987 |
| LCN2  | UC_vs_nonIBD | 0.80038912 | 0.30386257 | 0.77779511 |

**Table S8 (continued)**

|        |              |            |            |            |
|--------|--------------|------------|------------|------------|
| LEF1   | CD_vs_nonIBD | 0.21464072 | 0.56904538 | 0.83350678 |
| LEF1   | UC_vs_nonIBD | 0.47128625 | 0.25391462 | 0.7576485  |
| MAF    | CD_vs_nonIBD | 0.090307   | 0.84436383 | 0.95422368 |
| MAF    | UC_vs_nonIBD | 0.60468103 | 0.23110106 | 0.74722093 |
| MMP1   | CD_vs_nonIBD | 2.75410459 | 0.00074791 | 0.0589297  |
| MMP1   | UC_vs_nonIBD | 1.43742136 | 0.09586379 | 0.69047639 |
| MMP13  | CD_vs_nonIBD | 2.59811573 | 0.00049254 | 0.04894808 |
| MMP13  | UC_vs_nonIBD | 0.84126055 | 0.28121054 | 0.76831517 |
| MMP3   | CD_vs_nonIBD | 3.72374924 | 1.00E-04   | 0.02560496 |
| MMP3   | UC_vs_nonIBD | 2.19330868 | 0.02895379 | 0.62423699 |
| MMP9   | CD_vs_nonIBD | 0.51876709 | 0.22250504 | 0.57976923 |
| MMP9   | UC_vs_nonIBD | 0.9222929  | 0.04902445 | 0.65510444 |
| MUC5AC | CD_vs_nonIBD | 0.83868511 | 0.24737376 | 0.60565531 |
| MUC5AC | UC_vs_nonIBD | 0.40275613 | 0.6094913  | 0.89067144 |
| OSM    | CD_vs_nonIBD | 2.88265035 | 0.00013296 | 0.02793591 |
| OSM    | UC_vs_nonIBD | 1.10084449 | 0.16073828 | 0.71829205 |
| RORC   | CD_vs_nonIBD | -0.5521908 | 0.00327323 | 0.1081523  |
| RORC   | UC_vs_nonIBD | -0.4316474 | 0.03249    | 0.62423699 |
| SOCS3  | CD_vs_nonIBD | 2.04467339 | 2.34E-05   | 0.01616636 |
| SOCS3  | UC_vs_nonIBD | 0.93418108 | 0.0614125  | 0.66644493 |
| TCF7   | CD_vs_nonIBD | 0.14508972 | 0.6346556  | 0.86771627 |
| TCF7   | UC_vs_nonIBD | 0.47570566 | 0.15640088 | 0.71454055 |
| TNF    | CD_vs_nonIBD | 0.88193266 | 0.01994997 | 0.21628315 |
| TNF    | UC_vs_nonIBD | 0.54404506 | 0.18251773 | 0.72969256 |

\* The effect size is represented by the estimated coefficient from the linear model. Positive value means that genes are up-regulated in IBD (CD or UC) compared to Non-IBD condition. Negative value means down-regulated cases.

**Supplementary Table 9 | Differential abundance modeling of 3 $\alpha$ - and 3 $\beta$ -HSDH homologs in HMP2.** Table fields in the first sheet indicate 1) homolog ID; 2) class (i.e. 3 $\alpha$ -HSDH-based homolog and 3 $\beta$ -HSDH based homolog); 3-7) the prevalence of each homolog in each disease phenotype; 8-9) effect size estimated from the linear model's dysbiosis coefficient; 10-11) nominal p-values from the linear mixed-effects models (**Methods**); and 12-13) adjusted p-values based on the Benjamini-Hochberg procedure with target false discovery rate (FDR) of 0.05. Table fields in the 2-4 sheets follow the same format as the first sheet except the first three fields: 1) the UniRef90 annotations (which had been pre-computed using HUMAnN) (i.e. protein sequences with >90% amino acid identity and >80% coverage) of the genes identified as 3 $\alpha$ - and/ or 3 $\beta$ -HSDHs; 2) the genes identified as 3 $\alpha$ - and/ or 3 $\beta$ -HSDHs (Elen\_1325 and Elen\_0690 from *E. lenta*; Rumgna\_02133 and Rumgna\_00694 from *R. gnavus*; BF3538 from *B. fragilis* NCTC 9343); 3) the homolog of a given UniRef90 - the UniRef50 family (i.e. a set of proteins expected to have >50% identity and high coverage of the query) including all UniRef90 families belonging to it.

- sum\_mgx

| Homolog ID           | class  | pre.CD-dys  | pre.CD-nondys | pre.UC-dys  | pre.UC-nondys | prev.nonIBD-nondys | coef.CD-dys  | coef.UC-dys  | pval.CD-dys | pval.UC-dys | qval.CD-dys | qval.UC-dys |
|----------------------|--------|-------------|---------------|-------------|---------------|--------------------|--------------|--------------|-------------|-------------|-------------|-------------|
| 3aHSDH               | 3aHSDH | 0.81920904  | 0.990990991   | 0.921568627 | 0.989637306   | 0.997389034        | -0.655616711 | -0.3446491   | 9.32E-25    | 7.72E-05    | 6.52E-24    | 0.000199341 |
| Rumgna_02133 homolog | 3aHSDH | 0.807909605 | 0.987387387   | 0.921568627 | 0.989637306   | 0.997389034        | -0.666843011 | -0.357198708 | 9.61E-24    | 8.54E-05    | 3.36E-23    | 0.000199341 |
| Elen_0690 homolog    | 3aHSDH | 0.237288136 | 0.598198198   | 0.509803922 | 0.621761658   | 0.72845953         | -0.346298054 | -0.187409185 | 5.29E-05    | 0.107944832 | 0.000123515 | 0.151122764 |
| 3bHSDH               | 3bHSDH | 0.700564972 | 0.637837838   | 0.607843137 | 0.60880829    | 0.514360313        | -0.101283607 | -0.433158446 | 0.278365728 | 0.000459439 | 0.31886309  | 0.000804018 |
| BF3538 homolog       | 3bHSDH | 0.355932203 | 0.466666667   | 0.392156863 | 0.409326425   | 0.318537859        | -0.15905823  | -0.439106202 | 0.031893425 | 6.94E-06    | 0.055813494 | 4.86E-05    |
| Elen_1325 homolog    | 3bHSDH | 0.333333333 | 0.174774775   | 0.215686275 | 0.186528497   | 0.161879896        | 0.108491423  | -0.040712517 | 0.056796773 | 0.600118774 | 0.079515483 | 0.600118774 |
| Rumgna_00694 homolog | 3bHSDH | 0.242937853 | 0.216216216   | 0.156862745 | 0.233160622   | 0.187989556        | 0.055924554  | -0.057733265 | 0.31886309  | 0.457082572 | 0.31886309  | 0.533263001 |

Table S9 - Elen\_genes\_mgx

| HUMAnN2 Homolog + Stratification                    | Query Gene ID | Query UniRef50  | pre.CD-dys | pre.CD-nondys | pre.UC-dys | pre.UC-nondys | prev.nonIBD-nondys | coef.CD-dys | coef.UC-dys | pval.CD-dys | pval.UC-dys | qval.CD-dys | qval.UC-dys |
|-----------------------------------------------------|---------------|-----------------|------------|---------------|------------|---------------|--------------------|-------------|-------------|-------------|-------------|-------------|-------------|
| UniRef90_C4Z6X3                                     | ELEN_0690     | UniRef50_R5H8Q8 | 0.1469     | 0.5117        | 0.3529     | 0.5699        | 0.6710             | -0.2372     | -0.2852     | 0.0005      | 0.0021      | 0.0067      | 0.0103      |
| UniRef90_C4Z6X3 unclassified                        | ELEN_0690     | UniRef50_R5H8Q8 | 0.1469     | 0.5117        | 0.3529     | 0.5699        | 0.6710             | -0.2372     | -0.2852     | 0.0005      | 0.0021      | 0.0067      | 0.0103      |
| UniRef90_R7R433                                     | ELEN_0690     | UniRef50_R5H8Q8 | 0.0339     | 0.0523        | 0.0588     | 0.0751        | 0.1697             | -0.0289     | -0.0040     | 0.3448      | 0.9282      | 0.7869      | 0.9953      |
| UniRef90_R7R433 unclassified                        | ELEN_0690     | UniRef50_R5H8Q8 | 0.0339     | 0.0523        | 0.0588     | 0.0751        | 0.1697             | -0.0289     | -0.0040     | 0.3448      | 0.9282      | 0.7869      | 0.9953      |
| UniRef90_R5IF04                                     | ELEN_0690     | UniRef50_R5H8Q8 | 0.0282     | 0.0865        | 0.0784     | 0.0829        | 0.0992             | -0.0229     | 0.0442      | 0.4161      | 0.2490      | 0.7869      | 0.7782      |
| UniRef90_R5IF04 unclassified                        | ELEN_0690     | UniRef50_R5H8Q8 | 0.0282     | 0.0865        | 0.0784     | 0.0829        | 0.0992             | -0.0229     | 0.0442      | 0.4161      | 0.2490      | 0.7869      | 0.7782      |
| UniRef90_C8WMP0 unclassified                        | ELEN_0690     | UniRef50_R5H8Q8 | 0.0000     | 0.0018        | 0.0000     | 0.0000        | 0.0052             | -0.0012     | -0.0001     | 0.5292      | 0.9762      | 0.8268      | 0.9953      |
| UniRef90_C8WMP0 g_Gordonibacter s_Gordonibacter_p   | ELEN_0690     | UniRef50_R5H8Q8 | 0.0000     | 0.0000        | 0.0000     | 0.0078        | 0.0052             | -0.0011     | -0.0045     | 0.7532      | 0.4616      | 0.9953      | 0.9331      |
| UniRef90_R7BJD8                                     | ELEN_0690     | UniRef50_R5H8Q8 | 0.0000     | 0.0000        | 0.0588     | 0.0052        | 0.0444             | -0.0006     | 0.0791      | 0.9555      | 0.0000      | 0.9953      | 0.0000      |
| UniRef90_R7BJD8 unclassified                        | ELEN_0690     | UniRef50_R5H8Q8 | 0.0000     | 0.0000        | 0.0588     | 0.0052        | 0.0444             | -0.0006     | 0.0791      | 0.9555      | 0.0000      | 0.9953      | 0.0000      |
| UniRef90_R5U0E4 unclassified                        | ELEN_1325     | UniRef50_C8WQG3 | 0.0000     | 0.0018        | 0.0000     | 0.0000        | 0.0000             | -0.0005     | 0.0000      | 0.4721      | 0.9878      | 0.7869      | 0.9953      |
| UniRef90_C8WQG3 unclassified                        | ELEN_1325     | UniRef50_C8WQG3 | 0.0000     | 0.0018        | 0.0000     | 0.0000        | 0.0000             | -0.0005     | 0.0000      | 0.4713      | 0.9953      | 0.7869      | 0.9953      |
| UniRef90_C8WMP0 g_Peptostreptococcaceae_noname s    | ELEN_0690     | UniRef50_R5H8Q8 | 0.0000     | 0.0000        | 0.0196     | 0.0000        | 0.0000             | 0.0000      | 0.0060      | 0.9977      | 0.0000      | 0.9977      | 0.0000      |
| UniRef90_C8WQG3 g_Gordonibacter s_Gordonibacter_p   | ELEN_1325     | UniRef50_C8WQG3 | 0.0056     | 0.0000        | 0.0000     | 0.0104        | 0.0052             | 0.0005      | -0.0083     | 0.9272      | 0.3201      | 0.9953      | 0.8893      |
| UniRef90_R5H8Q8                                     | ELEN_0690     | UniRef50_R5H8Q8 | 0.0056     | 0.0108        | 0.0196     | 0.0181        | 0.0183             | 0.0013      | -0.0107     | 0.9005      | 0.4742      | 0.9953      | 0.9331      |
| UniRef90_R5H8Q8 unclassified                        | ELEN_0690     | UniRef50_R5H8Q8 | 0.0056     | 0.0108        | 0.0196     | 0.0181        | 0.0183             | 0.0013      | -0.0107     | 0.9005      | 0.4742      | 0.9953      | 0.9331      |
| UniRef90_C8WQG3 g_Peptostreptococcaceae_noname s    | ELEN_1325     | UniRef50_C8WQG3 | 0.0056     | 0.0000        | 0.0196     | 0.0026        | 0.0000             | 0.0020      | 0.0072      | 0.4170      | 0.0674      | 0.7869      | 0.2807      |
| UniRef90_A6NSX2                                     | ELEN_0690     | UniRef50_R5H8Q8 | 0.0282     | 0.0360        | 0.0784     | 0.0492        | 0.0548             | 0.0030      | -0.0059     | 0.8865      | 0.8482      | 0.9953      | 0.9953      |
| UniRef90_A6NSX2 g_Pseudoflavonifractor s_Pseudoflav | ELEN_0690     | UniRef50_R5H8Q8 | 0.0282     | 0.0360        | 0.0784     | 0.0492        | 0.0548             | 0.0030      | -0.0059     | 0.8865      | 0.8482      | 0.9953      | 0.9953      |
| UniRef90_C8WMP0                                     | ELEN_0690     | UniRef50_R5H8Q8 | 0.0395     | 0.0108        | 0.0196     | 0.0078        | 0.0078             | 0.0087      | 0.0108      | 0.3970      | 0.4852      | 0.7869      | 0.9331      |
| UniRef90_C8WMP0 g_Eggerthella s_Eggerthella_lenta   | ELEN_0690     | UniRef50_R5H8Q8 | 0.0395     | 0.0090        | 0.0000     | 0.0000        | 0.0026             | 0.0094      | 0.0004      | 0.2318      | 0.9707      | 0.7869      | 0.9953      |
| UniRef90_C8WQG3 g_Eggerthella s_Eggerthella_lenta   | ELEN_1325     | UniRef50_C8WQG3 | 0.0508     | 0.0072        | 0.0000     | 0.0052        | 0.0026             | 0.0116      | -0.0048     | 0.0928      | 0.6292      | 0.3868      | 0.9953      |
| UniRef90_C8WQG3                                     | ELEN_1325     | UniRef50_C8WQG3 | 0.0621     | 0.0090        | 0.0196     | 0.0181        | 0.0078             | 0.0244      | -0.0088     | 0.0354      | 0.6145      | 0.2948      | 0.9953      |
| UniRef90_R5U0E4                                     | ELEN_1325     | UniRef50_C8WQG3 | 0.3164     | 0.1694        | 0.2157     | 0.1813        | 0.1567             | 0.1042      | -0.0265     | 0.0632      | 0.7286      | 0.3161      | 0.9953      |
| UniRef90_R5U0E4 g_Clostridium s_Clostridium_hathewa | ELEN_1325     | UniRef50_C8WQG3 | 0.3164     | 0.1676        | 0.2157     | 0.1813        | 0.1567             | 0.1047      | -0.0268     | 0.0614      | 0.7253      | 0.3161      | 0.9953      |



Table S9 - Rumgna\_genes\_mgx (continued)

|                                                                                        |              |                 |        |        |        |        |        |        |         |        |        |        |        |
|----------------------------------------------------------------------------------------|--------------|-----------------|--------|--------|--------|--------|--------|--------|---------|--------|--------|--------|--------|
| UniRef90_R6UAF4 g_Peptostreptococaceae_noname s_Clostridium_difficile                  | Rumgna_00694 | UniRef50_R5TQC2 | 0.0056 | 0.0000 | 0.0000 | 0.0000 | 0.0000 | 0.0018 | 0.0000  | 0.0068 | 0.9883 | 0.0263 | 0.9993 |
| UniRef90_R9N7L8                                                                        | Rumgna_02133 | UniRef50_R5B9W8 | 0.0056 | 0.0072 | 0.0000 | 0.0000 | 0.0026 | 0.0024 | 0.0002  | 0.5733 | 0.9724 | 0.9746 | 0.9993 |
| UniRef90_R9N7L8 unclassified                                                           | Rumgna_02133 | UniRef50_R5B9W8 | 0.0056 | 0.0072 | 0.0000 | 0.0000 | 0.0026 | 0.0024 | 0.0002  | 0.5733 | 0.9724 | 0.9746 | 0.9993 |
| UniRef90_R6ZBB2                                                                        | Rumgna_02133 | UniRef50_R5B9W8 | 0.0056 | 0.0018 | 0.0000 | 0.0026 | 0.0000 | 0.0028 | -0.0052 | 0.4915 | 0.4090 | 0.9294 | 0.9993 |
| UniRef90_R6ZBB2 g_Coriobacteriaceae_noname s_Coriobacteriaceae_bacterium_phi           | Rumgna_02133 | UniRef50_R5B9W8 | 0.0056 | 0.0018 | 0.0000 | 0.0026 | 0.0000 | 0.0028 | -0.0052 | 0.4915 | 0.4090 | 0.9294 | 0.9993 |
| UniRef90_R5TKT5 g_Blautia s_Ruminococcus_gnavus                                        | Rumgna_02133 | UniRef50_R5B9W8 | 0.4068 | 0.3009 | 0.3922 | 0.2254 | 0.1671 | 0.0032 | 0.0703  | 0.9634 | 0.4545 | 0.9851 | 0.9993 |
| UniRef90_R9K3B3                                                                        | Rumgna_02133 | UniRef50_R5B9W8 | 0.0282 | 0.0180 | 0.0000 | 0.0181 | 0.0235 | 0.0048 | -0.0164 | 0.6957 | 0.3935 | 0.9851 | 0.9993 |
| UniRef90_R9K3B3 unclassified                                                           | Rumgna_02133 | UniRef50_R5B9W8 | 0.0282 | 0.0180 | 0.0000 | 0.0181 | 0.0235 | 0.0048 | -0.0164 | 0.6957 | 0.3935 | 0.9851 | 0.9993 |
| UniRef90_B1CB64                                                                        | Rumgna_02133 | UniRef50_R5B9W8 | 0.0056 | 0.0000 | 0.0196 | 0.0000 | 0.0000 | 0.0068 | 0.0053  | 0.0105 | 0.2275 | 0.0377 | 0.8159 |
| UniRef90_B1CB64 g_Anaerofustis s_Anaerofustis_stercorihominis                          | Rumgna_02133 | UniRef50_R5B9W8 | 0.0056 | 0.0000 | 0.0196 | 0.0000 | 0.0000 | 0.0068 | 0.0053  | 0.0105 | 0.2275 | 0.0377 | 0.8159 |
| UniRef90_R5TKT5                                                                        | Rumgna_02133 | UniRef50_R5B9W8 | 0.4181 | 0.3045 | 0.3922 | 0.2383 | 0.1749 | 0.0083 | 0.0248  | 0.9094 | 0.8034 | 0.9851 | 0.9993 |
| UniRef90_R6UAF4 g_Erysipelotrichaceae_noname s_Erysipelotrichaceae_bacterium_3_1_53    | Rumgna_00694 | UniRef50_R5TQC2 | 0.0169 | 0.0072 | 0.0000 | 0.0000 | 0.0026 | 0.0092 | -0.0003 | 0.1364 | 0.9737 | 0.3834 | 0.9993 |
| UniRef90_U2C7T4                                                                        | Rumgna_02133 | UniRef50_R5B9W8 | 0.0621 | 0.1171 | 0.0980 | 0.0829 | 0.0313 | 0.0094 | -0.0558 | 0.8397 | 0.3773 | 0.9851 | 0.9993 |
| UniRef90_R6UAF4 unclassified                                                           | Rumgna_00694 | UniRef50_R5TQC2 | 0.0169 | 0.0000 | 0.0000 | 0.0000 | 0.0000 | 0.0098 | 0.0001  | 0.0050 | 0.9838 | 0.0219 | 0.9993 |
| UniRef90_R9MDG8                                                                        | Rumgna_02133 | UniRef50_R5B9W8 | 0.0452 | 0.0198 | 0.0000 | 0.0259 | 0.0261 | 0.0122 | -0.0173 | 0.3997 | 0.4423 | 0.8313 | 0.9993 |
| UniRef90_R9MDG8 unclassified                                                           | Rumgna_02133 | UniRef50_R5B9W8 | 0.0452 | 0.0198 | 0.0000 | 0.0259 | 0.0261 | 0.0122 | -0.0173 | 0.3997 | 0.4423 | 0.8313 | 0.9993 |
| UniRef90_B9Y5C1 unclassified                                                           | Rumgna_00694 | UniRef50_R5TQC2 | 0.0226 | 0.0000 | 0.0000 | 0.0000 | 0.0026 | 0.0124 | -0.0001 | 0.0000 | 0.9828 | 0.0000 | 0.9993 |
| UniRef90_R6UAF4 g_Erysipelotrichaceae_noname s_Erysipelotrichaceae_bacterium_6_1_45    | Rumgna_00694 | UniRef50_R5TQC2 | 0.0678 | 0.0162 | 0.0980 | 0.0104 | 0.0183 | 0.0163 | 0.0734  | 0.3374 | 0.0020 | 0.7797 | 0.0700 |
| UniRef90_R6UAF4 g_Erysipelotrichaceae_noname s_Erysipelotrichaceae_bacterium_21_3      | Rumgna_00694 | UniRef50_R5TQC2 | 0.0621 | 0.0072 | 0.0784 | 0.0104 | 0.0052 | 0.0172 | 0.0441  | 0.2879 | 0.0550 | 0.6804 | 0.3367 |
| UniRef90_R6R2D2                                                                        | Rumgna_02133 | UniRef50_R5B9W8 | 0.0621 | 0.0324 | 0.0980 | 0.0466 | 0.0627 | 0.0194 | 0.0113  | 0.4309 | 0.7628 | 0.8618 | 0.9993 |
| UniRef90_R6R2D2 unclassified                                                           | Rumgna_02133 | UniRef50_R5B9W8 | 0.0621 | 0.0324 | 0.0980 | 0.0466 | 0.0627 | 0.0194 | 0.0113  | 0.4309 | 0.7628 | 0.8618 | 0.9993 |
| UniRef90_H7CU74                                                                        | Rumgna_02133 | UniRef50_R5B9W8 | 0.0282 | 0.0054 | 0.0196 | 0.0026 | 0.0000 | 0.0305 | 0.0209  | 0.0001 | 0.0903 | 0.0009 | 0.4267 |
| UniRef90_H7CU74 g_Clostridium s_Clostridium_perfringens                                | Rumgna_02133 | UniRef50_R5B9W8 | 0.0282 | 0.0054 | 0.0196 | 0.0026 | 0.0000 | 0.0305 | 0.0209  | 0.0001 | 0.0903 | 0.0009 | 0.4267 |
| UniRef90_U5F5L7                                                                        | Rumgna_02133 | UniRef50_R5B9W8 | 0.0904 | 0.0631 | 0.2157 | 0.0648 | 0.0653 | 0.0322 | -0.0006 | 0.3763 | 0.9907 | 0.8313 | 0.9993 |
| UniRef90_R6UAF4 g_Erysipelotrichaceae_noname s_Clostridium_innocuum                    | Rumgna_00694 | UniRef50_R5TQC2 | 0.0847 | 0.0072 | 0.0196 | 0.0130 | 0.0026 | 0.0336 | 0.0111  | 0.0250 | 0.5978 | 0.0866 | 0.9993 |
| UniRef90_S2XY50 unclassified                                                           | Rumgna_02133 | UniRef50_R5B9W8 | 0.0678 | 0.0126 | 0.0196 | 0.0026 | 0.0026 | 0.0427 | 0.0070  | 0.0000 | 0.6139 | 0.0001 | 0.9993 |
| UniRef90_S2XY50 g_Lachnospiraceae_noname s_Lachnospiraceae_bacterium_4_1_37FAA         | Rumgna_02133 | UniRef50_R5B9W8 | 0.0452 | 0.0018 | 0.0000 | 0.0026 | 0.0026 | 0.0516 | -0.0009 | 0.0001 | 0.9651 | 0.0008 | 0.9993 |
| UniRef90_R6UAF4 g_Erysipelotrichaceae_noname s_Erysipelotrichaceae_bacterium_2_2_44A   | Rumgna_00694 | UniRef50_R5TQC2 | 0.0791 | 0.0108 | 0.0980 | 0.0207 | 0.0131 | 0.0562 | 0.0623  | 0.0031 | 0.0258 | 0.0152 | 0.2179 |
| UniRef90_S2XY50 g_Lachnospiraceae_noname s_Lachnospiraceae_bacterium_9_1_43BFAA        | Rumgna_02133 | UniRef50_R5B9W8 | 0.1130 | 0.0090 | 0.0000 | 0.0052 | 0.0026 | 0.0601 | 0.0003  | 0.0007 | 0.9911 | 0.0040 | 0.9993 |
| UniRef90_U5F5L7 g_Erysipelotrichaceae_noname s_Erysipelotrichaceae_bacterium_5_2_54FAA | Rumgna_02133 | UniRef50_R5B9W8 | 0.0226 | 0.0090 | 0.1765 | 0.0233 | 0.0000 | 0.0604 | 0.0163  | 0.0001 | 0.4467 | 0.0009 | 0.9993 |
| UniRef90_U2C7T4 unclassified                                                           | Rumgna_02133 | UniRef50_R5B9W8 | 0.0565 | 0.0450 | 0.0196 | 0.0363 | 0.0261 | 0.0832 | -0.0335 | 0.0006 | 0.3283 | 0.0036 | 0.9993 |
| UniRef90_R6UAF4                                                                        | Rumgna_00694 | UniRef50_R5TQC2 | 0.1864 | 0.0324 | 0.0980 | 0.0311 | 0.0287 | 0.1394 | 0.0821  | 0.0000 | 0.0382 | 0.0000 | 0.2577 |
| UniRef90_S2XY50                                                                        | Rumgna_02133 | UniRef50_R5B9W8 | 0.1977 | 0.0216 | 0.0196 | 0.0104 | 0.0052 | 0.1612 | 0.0108  | 0.0000 | 0.7652 | 0.0000 | 0.9993 |

**Table S9 - BF3538\_mgx**

| HUMAN2 Homolog + Stratification                      | Query Gene ID | UniRef50        | pre.CD-dys | pre.CD-nondys | pre.UC-dys | pre.UC-nondys | prev.nonIBD-nondys | coef.CD-dys | coef.UC-dys | pval.CD-dys | pval.UC-dys | qval.CD-dys | qval.UC-dys |
|------------------------------------------------------|---------------|-----------------|------------|---------------|------------|---------------|--------------------|-------------|-------------|-------------|-------------|-------------|-------------|
| UniRef90_E1WV34                                      | BF3538        | UniRef50_E1WV34 | 0.3107     | 0.4324        | 0.3137     | 0.3497        | 0.3185             | -0.1870     | -0.3871     | 0.0087      | 0.0000      | 0.0261      | 0.0001      |
| UniRef90_E1WV34 g_Bacteroides s_Bacteroides_fragilis | BF3538        | UniRef50_E1WV34 | 0.3107     | 0.4324        | 0.3137     | 0.3446        | 0.3159             | -0.1871     | -0.3866     | 0.0084      | 0.0000      | 0.0261      | 0.0001      |
| UniRef90_E1WV34 g_Bacteroides s_Bacteroides_sp_3_2_5 | BF3538        | UniRef50_E1WV34 | 0.0056     | 0.0018        | 0.0000     | 0.0000        | 0.0235             | 0.0006      | 0.0000      | 0.9485      | 0.9993      | 0.9485      | 0.9993      |
| UniRef90_E1WV34 unclassified                         | BF3538        | UniRef50_E1WV34 | 0.0282     | 0.0090        | 0.0196     | 0.0155        | 0.0026             | 0.0140      | 0.0095      | 0.1781      | 0.5764      | 0.3562      | 0.6917      |
| UniRef90_R5RWD9                                      | BF3538        | UniRef50_E1WV34 | 0.0452     | 0.0360        | 0.0784     | 0.0596        | 0.0000             | 0.0124      | -0.0336     | 0.4799      | 0.1410      | 0.5758      | 0.2115      |
| UniRef90_R5RWD9 g_Bacteroides s_Bacteroides_fragilis | BF3538        | UniRef50_E1WV34 | 0.0452     | 0.0360        | 0.0784     | 0.0596        | 0.0000             | 0.0124      | -0.0336     | 0.4799      | 0.1410      | 0.5758      | 0.2115      |



**Supplementary Table 10 | Differential abundance modeling of species with 3 $\alpha$ -/3 $\beta$ -HSDH homologs in HMP2.** Table fields follow the same format as Supplementary Information Table 9 (detailed above) without the 'class' field.

| species                           | pre.CD-dys  | pre.CD-nondys | pre.UC-dys  | pre.UC-nondys | pre.nonIBD-nondys | coef.CD-dys  | coef.UC-dys  | pval.CD-dys | pval.UC-dys | qval.CD-dys | qval.UC-dys |
|-----------------------------------|-------------|---------------|-------------|---------------|-------------------|--------------|--------------|-------------|-------------|-------------|-------------|
| Adlercreutzia_equilifaciens       | 0.04519774  | 0.066666667   | 0.039215686 | 0.10880829    | 0.161879896       | -0.095280005 | -0.018421386 | 0.115874981 | 0.826534144 | 0.202781217 | 0.826534144 |
| Bacteroides_cellulosilyticus      | 0.06779661  | 0.358558559   | 0.176470588 | 0.341968912   | 0.441253264       | -0.244964165 | -0.28521006  | 0.003337869 | 0.008327685 | 0.008761907 | 0.031264721 |
| Bacteroides_dorei                 | 0.412429379 | 0.666666667   | 0.62745098  | 0.652849741   | 0.796344648       | -0.741864941 | -0.181390829 | 6.43E-11    | 0.215956759 | 4.50E-10    | 0.302339463 |
| Bacteroides_fragilis              | 0.457627119 | 0.645045045   | 0.549019608 | 0.533678756   | 0.527415144       | -0.61688588  | -0.761459857 | 1.50E-05    | 4.29E-05    | 7.90E-05    | 0.000450683 |
| Bacteroides_intestinalis          | 0.04519774  | 0.172972973   | 0           | 0.106217617   | 0.125326371       | -0.04394252  | -0.059681073 | 0.3909779   | 0.369828381 | 0.58646685  | 0.456846823 |
| Bacteroides_uniformis             | 0.598870056 | 0.936936937   | 0.607843137 | 0.914507772   | 0.934725849       | -1.199319275 | -0.673457777 | 3.65E-26    | 4.10E-06    | 7.67E-25    | 8.61E-05    |
| Bacteroides_vulgatus              | 0.740112994 | 0.924324324   | 0.843137255 | 0.948186528   | 0.966057441       | -0.933533454 | -0.249291185 | 2.46E-21    | 0.048381849 | 2.58E-20    | 0.107090565 |
| Bifidobacterium_pseudocatenulatum | 0.033898305 | 0.189189189   | 0.098039216 | 0.111398964   | 0.164490862       | -0.125890139 | -0.06113882  | 0.096339207 | 0.546183713 | 0.183920305 | 0.603676736 |
| Catenibacterium_mitsuokai         | 0.011299435 | 0.068468468   | 0           | 0.010362694   | 0.057441253       | -0.019473213 | -0.012038734 | 0.287458109 | 0.609420567 | 0.464355408 | 0.639891596 |
| Clostridium_bolteae               | 0.774011299 | 0.747747748   | 0.784313725 | 0.79015544    | 0.537859008       | -0.238484829 | -0.338418712 | 0.074784155 | 0.057753542 | 0.157046726 | 0.110256761 |
| Clostridium_citroniae             | 0.192090395 | 0.340540541   | 0.137254902 | 0.313471503   | 0.25848564        | -0.200713759 | -0.323093724 | 0.039348582 | 0.015652418 | 0.091813358 | 0.046957253 |
| Clostridium_innocuum              | 0.129943503 | 0.028828829   | 0.058823529 | 0.080310881   | 0.026109661       | -0.004560498 | -0.049939383 | 0.919363197 | 0.421096189 | 0.965331357 | 0.491278888 |
| Clostridium_scindens              | 0.09039548  | 0.068468468   | 0.039215686 | 0.062176166   | 0.096605744       | 0.007855126  | -0.10848664  | 0.863852421 | 0.083603735 | 0.954784255 | 0.146306536 |
| Collinsella_aerofaciens           | 0.192090395 | 0.565765766   | 0.254901961 | 0.554404145   | 0.64229765        | -0.386254564 | -0.274874344 | 4.26E-05    | 0.026130731 | 0.000178956 | 0.068593168 |
| Collinsella_intestinalis          | 0.04519774  | 0.043243243   | 0.117647059 | 0.090673575   | 0.028720627       | -0.108742319 | -0.125633981 | 0.003090799 | 0.008932778 | 0.008761907 | 0.031264721 |
| Eggerthella_lenta                 | 0.118644068 | 0.041441441   | 0           | 0.025906736   | 0.018276762       | -0.011704783 | -0.066596964 | 0.746871705 | 0.181417694 | 0.915616498 | 0.272126541 |
| Gordonibacter_pamelaeae           | 0.005649718 | 0.009009009   | 0           | 0.023316062   | 0.020887728       | -0.000713535 | -0.029115134 | 0.968528731 | 0.288585251 | 0.968528731 | 0.378768142 |
| Parabacteroides_merdae            | 0.214689266 | 0.630630631   | 0.215686275 | 0.668393782   | 0.618798956       | -0.392522235 | -0.350067731 | 8.23E-05    | 0.006654119 | 0.000287893 | 0.031264721 |
| Peptoniphilus_harei               | 0           | 0.005405405   | 0           | 0.025906736   | 0.007832898       | -0.004679827 | -0.036509825 | 0.784814141 | 0.136508428 | 0.915616498 | 0.220513615 |
| Pseudoflavonifractor_capillosus   | 0.129943503 | 0.147747748   | 0.117647059 | 0.18134715    | 0.279373368       | 0.029500081  | -0.155222993 | 0.621468627 | 0.050995507 | 0.815677573 | 0.107090565 |
| Ruminococcus_gnavus               | 0.768361582 | 0.607207207   | 0.882352941 | 0.603626943   | 0.467362924       | 0.098122606  | 0.458889809  | 0.433419916 | 0.005888036 | 0.606787882 | 0.031264721 |

**Supplementary Table 11a - qPCR results for 16s rRNA gene to confirm successful colonization for the second set of experiment in Fig. 4b.**

| Sample # | <i>E. lenta</i> | Diet    | Target              | Ct values | Feces (mg) |
|----------|-----------------|---------|---------------------|-----------|------------|
| 1        | DSM 2243        | Control | <i>E. lenta</i> 16s | 25.82     | 36.6       |
| 2        | DSM 2243        | Control | <i>E. lenta</i> 16s | 24.86     | 81.6       |
| 3        | DSM 2243        | LCA     | <i>E. lenta</i> 16s | 24.96     | 80.0       |
| 4        | DSM 2243        | LCA     | <i>E. lenta</i> 16s | 23.62     | 120.3      |
| 5        | DSM 2243        | LCA     | <i>E. lenta</i> 16s | 22.99     | 60.5       |
| 6        | DSM 15644       | Control | <i>E. lenta</i> 16s | 25.50     | 50.8       |
| 7        | DSM 15644       | Control | <i>E. lenta</i> 16s | 26.21     | 65.9       |
| 8        | DSM 15644       | LCA     | <i>E. lenta</i> 16s | 27.06     | 51.7       |
| 9        | DSM 15644       | LCA     | <i>E. lenta</i> 16s | 25.35     | 89.7       |
| 10       | DSM 15644       | LCA     | <i>E. lenta</i> 16s | 26.17     | 92.8       |

**Supplementary Table 11b - qPCR results for 16s rRNA gene to confirm successful colonization for the second sets of experiment in Fig. 4c.**

| Sample # | <i>E. lenta</i> | 2nd bacteria       | Target              | Ct value       | Target                 | Ct value | Feces (mg) |
|----------|-----------------|--------------------|---------------------|----------------|------------------------|----------|------------|
| 1        | -               | -                  | <i>E. lenta</i> 16s | -              | <i>B. fragilis</i> 16s | -        | 25.9       |
| 2        | -               | -                  | <i>E. lenta</i> 16s | 33.63          | <i>B. fragilis</i> 16s | -        | 23.2       |
| 3        | -               | -                  | <i>E. lenta</i> 16s | 32.87          | <i>B. fragilis</i> 16s | -        | 39.0       |
| 4        | -               | -                  | <i>E. lenta</i> 16s | -              | <i>B. fragilis</i> 16s | -        | 26.80      |
| 17       | DSM 2243        | <i>B. fragilis</i> | <i>E. lenta</i> 16s | 22.52          | <i>B. fragilis</i> 16s | 15.13    | 35.20      |
| 18       | DSM 2243        | <i>B. fragilis</i> | <i>E. lenta</i> 16s | 24.08          | <i>B. fragilis</i> 16s | 15.04    | 48.50      |
| 19       | DSM 2243        | <i>B. fragilis</i> | <i>E. lenta</i> 16s | 23.86          | <i>B. fragilis</i> 16s | 15.65    | 33.20      |
| 20       | DSM 2243        | <i>B. fragilis</i> | <i>E. lenta</i> 16s | 24.28          | <i>B. fragilis</i> 16s | 16.77    | 101.5      |
| 56       | -               | <i>B. fragilis</i> | <i>E. lenta</i> 16s | not determined | <i>B. fragilis</i> 16s | 23.88    | 87         |
| 57       | -               | <i>B. fragilis</i> | <i>E. lenta</i> 16s | not determined | <i>B. fragilis</i> 16s | 23.24    | 96         |
| 58       | -               | <i>B. fragilis</i> | <i>E. lenta</i> 16s | not determined | <i>B. fragilis</i> 16s | 23.15    | 80         |

Supplementary table 12 | Deposition of standards in MoNA - MassBank of North America.

| Compound               | Compound_ID_Short | Chemical Formula | RT    | MZ          | RT_MS2 | MZ_MS2      | SMILES                                                                                          | MoNA_Deposition | Adduct    | Neutral  | [M+H]    | [M+NH4]  | [M+Na]   | [M-H]    | [M-H2O+H]   |
|------------------------|-------------------|------------------|-------|-------------|--------|-------------|-------------------------------------------------------------------------------------------------|-----------------|-----------|----------|----------|----------|----------|----------|-------------|
| 3-oxo lithocholic acid | 3oxoLCA           | C24H38O3         | 12.49 | 373.2748    | 12.49  | 373.2748    | <chem>C[C@H](CCCC(=O)O)[C@H]1CC[C@@H]2[C@@]1(CC[C@H]3[C@H]2CC[C@@H]4[C@@]3(CCC(=O)C4)O)C</chem> | MoNA031840      | [M-H]     | 374.2821 | 375.2894 | 392.3159 | 397.2713 | 373.2748 | 357.2788    |
| isolithocholic acid    | isoLCA            | C24H40O3         | 11.54 | 375.2905    | 11.54  | 375.2905    | <chem>C[C@H](CCCC(=O)O)[C@H]1CC[C@@H]2[C@@]1(CC[C@H]3[C@H]2CC[C@@H]4[C@@]3(CCC(=O)C4)O)C</chem> | MoNA031841      | [M-H]     | 376.2977 | 377.305  | 394.3316 | 399.287  | 375.2905 | 359.294457  |
| lithocholic acid       | LCA               | C24H40O3         | 12.24 | 375.2904    | 12.24  | 375.2904    | <chem>C[C@H](CCCC(=O)O)[C@H]1CC[C@@H]2[C@@]1(CC[C@H]3[C@H]2CC[C@@H]4[C@@]3(CCC(=O)C4)O)C</chem> | MoNA031842      | [M-H]     | 376.2977 | 377.305  | 394.3316 | 399.287  | 375.2905 | 359.294457  |
| allolithocholic acid   | alloLCA           | C24H40O3         | 12.29 | 375.2904    | 12.29  | 375.2904    | <chem>C[C@H](CCCC(=O)O)[C@H]1CC[C@@H]2[C@@]1(CC[C@H]3[C@H]2CC[C@@H]4[C@@]3(CCC(=O)C4)O)C</chem> | MoNA031843      | [M-H]     | 376.2977 | 377.305  | 394.3316 | 399.287  | 375.2905 | 359.294457  |
| isolithocholic acid    | isoLCA            | C24H40O3         | 11.42 | 375.2904    | 11.42  | 375.2904    | <chem>C[C@H](CCCC(=O)O)[C@H]1CC[C@@H]2[C@@]1(CC[C@H]3[C@H]2CC[C@@H]4[C@@]3(CCC(=O)C4)O)C</chem> | MoNA031844      | [M-H]     | 376.2977 | 377.305  | 394.3316 | 399.287  | 375.2905 | 359.294457  |
| 3oxo deoxycholic acid  | 3oxoDCA           | C24H38O4         | 10.44 | 389.2697    | 10.44  | 389.2697    | <chem>C[C@H](CCCC(=O)O)[C@H]1CC[C@@H]2[C@@]1(CC[C@H]3[C@H]2CC[C@@H]4[C@@]3(CCC(=O)C4)O)C</chem> | MoNA031845      | [M-H]     | 390.277  | 391.2843 | 408.3108 | 413.2662 | 389.2697 | 373.2737215 |
| iso deoxycholic acid   | isoDCA            | C24H40O4         | 9.38  | 391.2853    | 9.38   | 391.2853    | <chem>C[C@H](CCCC(=O)O)[C@H]1CC[C@@H]2[C@@]1(CC[C@H]3[C@H]2CC[C@@H]4[C@@]3(CCC(=O)C4)O)C</chem> | MoNA031846      | [M-H]     | 392.2927 | 393.2999 | 410.3265 | 415.2819 | 391.2854 | 375.2893716 |
| deoxycholic acid       | DCA               | C24H40O4         | 10.44 | 391.2853    | 10.44  | 391.2853    | <chem>C[C@H](CCCC(=O)O)[C@H]1CC[C@@H]2[C@@]1(CC[C@H]3[C@H]2CC[C@@H]4[C@@]3(CCC(=O)C4)O)C</chem> | MoNA031847      | [M-H]     | 392.2927 | 393.2999 | 410.3265 | 415.2819 | 391.2854 | 375.2893716 |
| 3-oxo lithocholic acid | 3oxoLCA           | C24H38O3         | 12.49 | 357.2788    | 12.49  | 357.2788    | <chem>C[C@H](CCCC(=O)O)[C@H]1CC[C@@H]2[C@@]1(CC[C@H]3[C@H]2CC[C@@H]4[C@@]3(CCC(=O)C4)O)C</chem> | MoNA031848      | [M-H2O+H] | 374.2821 | 375.2894 | 392.3159 | 397.2713 | 373.2748 | 357.2788    |
| isolithocholic acid    | isoLCA            | C24H40O3         | 11.54 | 359.294457  | 11.54  | 359.294457  | <chem>C[C@H](CCCC(=O)O)[C@H]1CC[C@@H]2[C@@]1(CC[C@H]3[C@H]2CC[C@@H]4[C@@]3(CCC(=O)C4)O)C</chem> | MoNA031849      | [M-H2O+H] | 376.2977 | 377.305  | 394.3316 | 399.287  | 375.2905 | 359.294457  |
| lithocholic acid       | LCA               | C24H40O3         | 12.24 | 359.294457  | 12.24  | 359.294457  | <chem>C[C@H](CCCC(=O)O)[C@H]1CC[C@@H]2[C@@]1(CC[C@H]3[C@H]2CC[C@@H]4[C@@]3(CCC(=O)C4)O)C</chem> | MoNA031850      | [M-H2O+H] | 376.2977 | 377.305  | 394.3316 | 399.287  | 375.2905 | 359.294457  |
| allolithocholic acid   | alloLCA           | C24H40O3         | 12.29 | 359.294457  | 12.29  | 359.294457  | <chem>C[C@H](CCCC(=O)O)[C@H]1CC[C@@H]2[C@@]1(CC[C@H]3[C@H]2CC[C@@H]4[C@@]3(CCC(=O)C4)O)C</chem> | MoNA031851      | [M-H2O+H] | 376.2977 | 377.305  | 394.3316 | 399.287  | 375.2905 | 359.294457  |
| isolithocholic acid    | isoLCA            | C24H40O3         | 11.42 | 359.294457  | 11.42  | 359.294457  | <chem>C[C@H](CCCC(=O)O)[C@H]1CC[C@@H]2[C@@]1(CC[C@H]3[C@H]2CC[C@@H]4[C@@]3(CCC(=O)C4)O)C</chem> | MoNA031852      | [M-H2O+H] | 376.2977 | 377.305  | 394.3316 | 399.287  | 375.2905 | 359.294457  |
| 3oxo deoxycholic acid  | 3oxoDCA           | C24H38O4         | 10.44 | 373.2737215 | 10.44  | 373.2737215 | <chem>C[C@H](CCCC(=O)O)[C@H]1CC[C@@H]2[C@@]1(CC[C@H]3[C@H]2CC[C@@H]4[C@@]3(CCC(=O)C4)O)C</chem> | MoNA031853      | [M-H2O+H] | 390.277  | 391.2843 | 408.3108 | 413.2662 | 389.2697 | 373.2737215 |
| iso deoxycholic acid   | isoDCA            | C24H40O4         | 9.38  | 375.2893716 | 9.38   | 375.2893716 | <chem>C[C@H](CCCC(=O)O)[C@H]1CC[C@@H]2[C@@]1(CC[C@H]3[C@H]2CC[C@@H]4[C@@]3(CCC(=O)C4)O)C</chem> | MoNA031854      | [M-H2O+H] | 392.2927 | 393.2999 | 410.3265 | 415.2819 | 391.2854 | 375.2893716 |
| deoxycholic acid       | DCA               | C24H40O4         | 10.44 | 375.2893716 | 10.44  | 375.2893716 | <chem>C[C@H](CCCC(=O)O)[C@H]1CC[C@@H]2[C@@]1(CC[C@H]3[C@H]2CC[C@@H]4[C@@]3(CCC(=O)C4)O)C</chem> | MoNA031854      | [M-H2O+H] | 392.2927 | 393.2999 | 410.3265 | 415.2819 | 391.2854 | 375.2893716 |

## References

- 56 Varasi, M.; Walker, K. A. M.; Maddox, M. L. A Revised Mechanism for the Mitsunobu Reaction. *J. Org. Chem.* **52**, 4235–4238, doi:10.1021/jo00228a016 (1987).
- 57 Yang, J.; Cheng, Y.; Shi, Z.; Zhao, Z. Synthesis of Novel Triazole Derivatives of Methyl 3-Oxochohanate Using Microwave Irradiation. *Journal of Chemical Research* **34**, 680–683, doi:10.3184/030823410X12857507693328 (2010).
- 58 Fujioka, H.; Okitsu, T.; Ohnaka, T.; Sawama, Y.; Kubo, O.; Okamoto, K.; Kita, Y. Reaction of Tetrahydropyranyl Ethers with Triethylsilyl Trifluoromethanesulfonate–2,4,6-Collidine Combination: Speculation on the Intermediate, Efficient Deprotection, and Application to Efficient Ring-Closing Metathesis as a Tether. *Adv. Synth. Catal.* **349**, 636–646, doi:10.1002/adsc.200600572 (2007).
- 59 Miro, P.; Vayá, I.; Sastre, G.; Jiménez, M. C.; Marin, M. L.; Miranda, M. A. Triplet Energy Management Between Two Signaling Units Through Cooperative Rigid Scaffolds. *Chem. Commun.* **52**, 713–716, doi:10.1039/C5CC08102E (2016).
- 60 Bisanz, J. E. et al. A Genomic Toolkit for the Mechanistic Dissection of Intractable Human Gut Bacteria. *Cell Host Microbe* **27**, 1001-1013.e9 (2020).
- 61 Lloyd-Price, J. et al. Multi-omics of the gut microbial ecosystem in inflammatory bowel diseases. *Nature* **569**, 655–662 (2019).
- 62 Revu, S. et al. IL-23 and IL-1 $\beta$  Drive Human Th17 Cell Differentiation and Metabolic Reprogramming in Absence of CD28 Costimulation. *Cell Reports* **22**, 2642–2653 (2018).
